# Supplementary material for: Genetic Structure of Avian Influenza Viruses from Ducks of the Atlantic Flyway of North America
Source: PubMed Central journal article supplement (PMC3907406; doi:10.1371/journal.pone.0086999), 2014-01-30

**Figure S2. Identification of Atlantic flyway duck AIV genes in other bird hosts.**

Phylogenetic trees were constructed to highlight the distribution of the genes found in the 109 Atlantic flyway duck AIVs in non-duck host species. The neighbour-joining trees were constructed with MEGA5 and support values based on 1000 bootstrap replicates are shown as percentages where  $\geq 70\%$ . The sub-lineages are labelled on the right of the phylogenetic trees. Black branch lines indicate detection of the sub-lineage in non-duck species, whereas grey branch lines indicate the detection of the sub-lineage only in ducks. For the H16 tree, the 3 gull-related lineages (H16A to C) established in the Flugenome database were labelled in red.

**PB2**

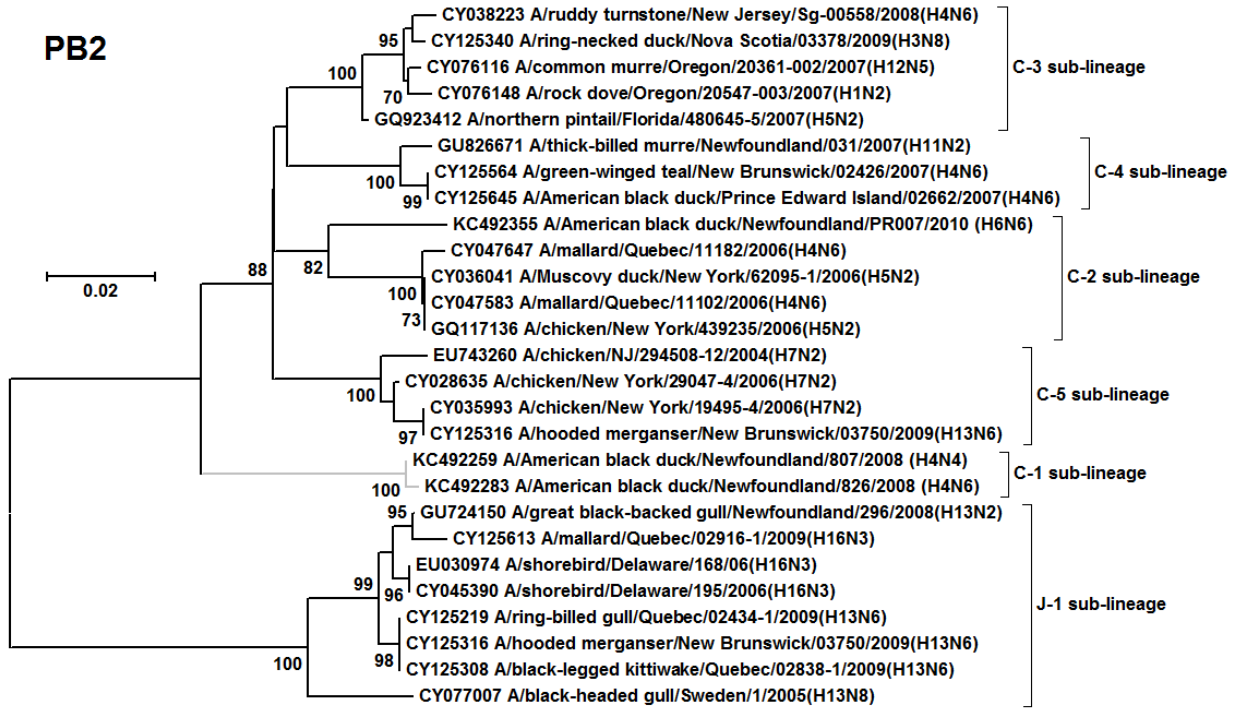

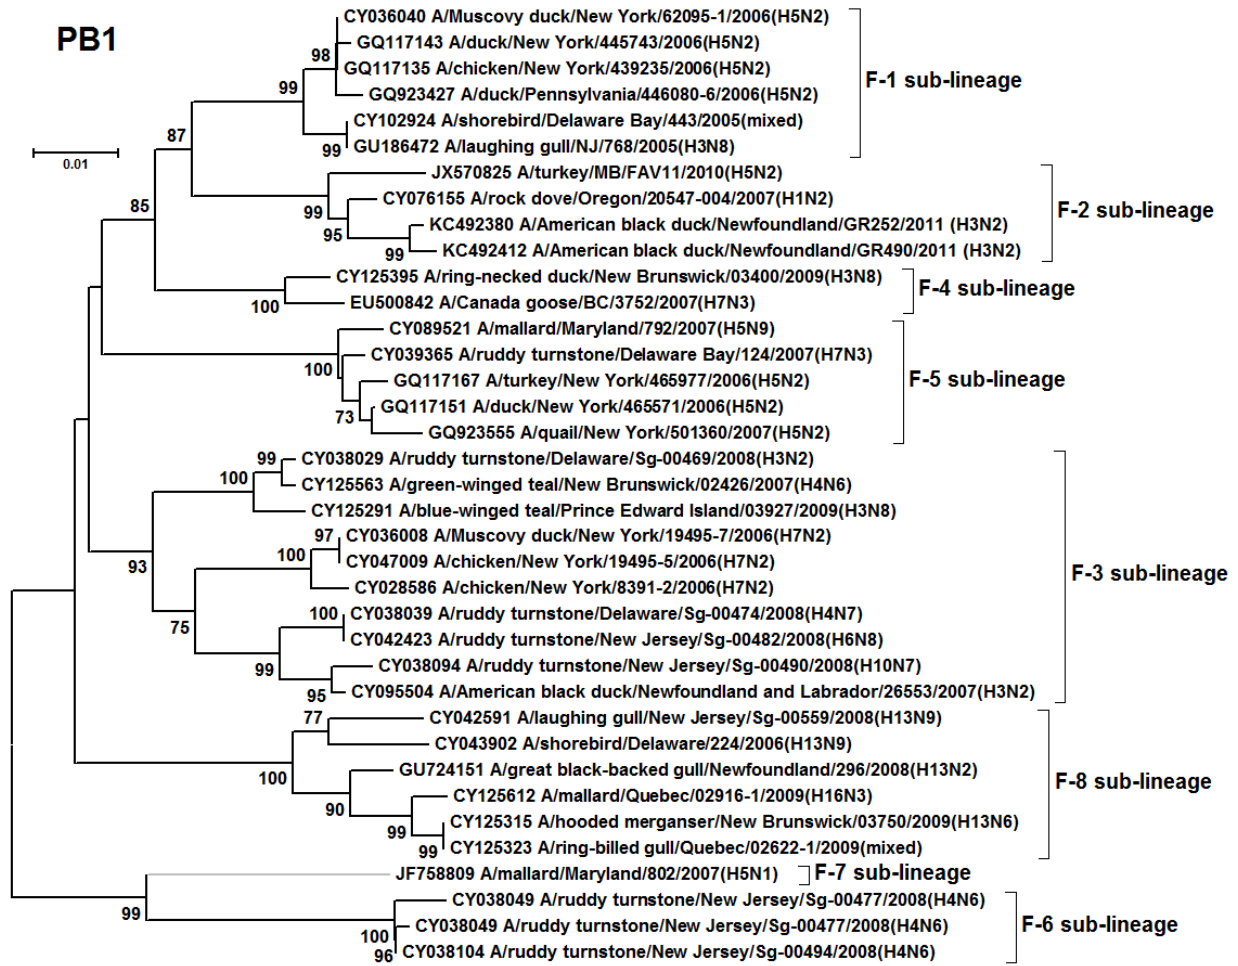

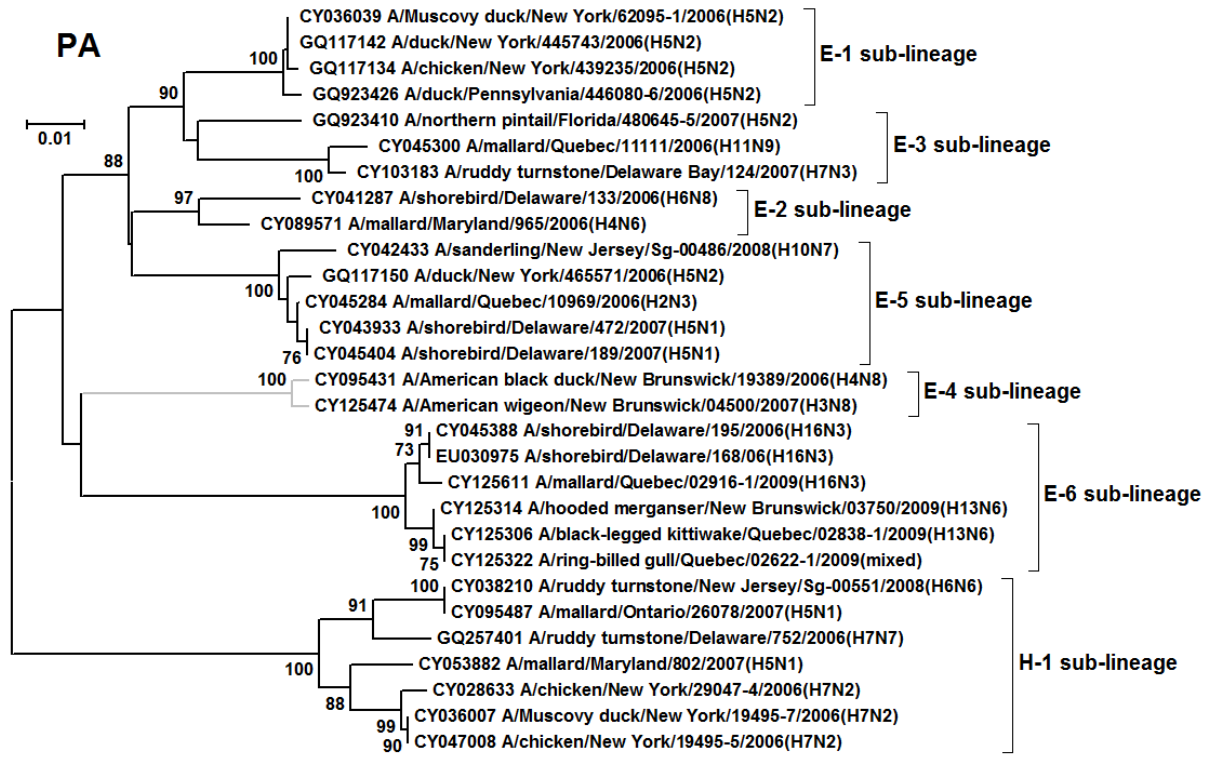

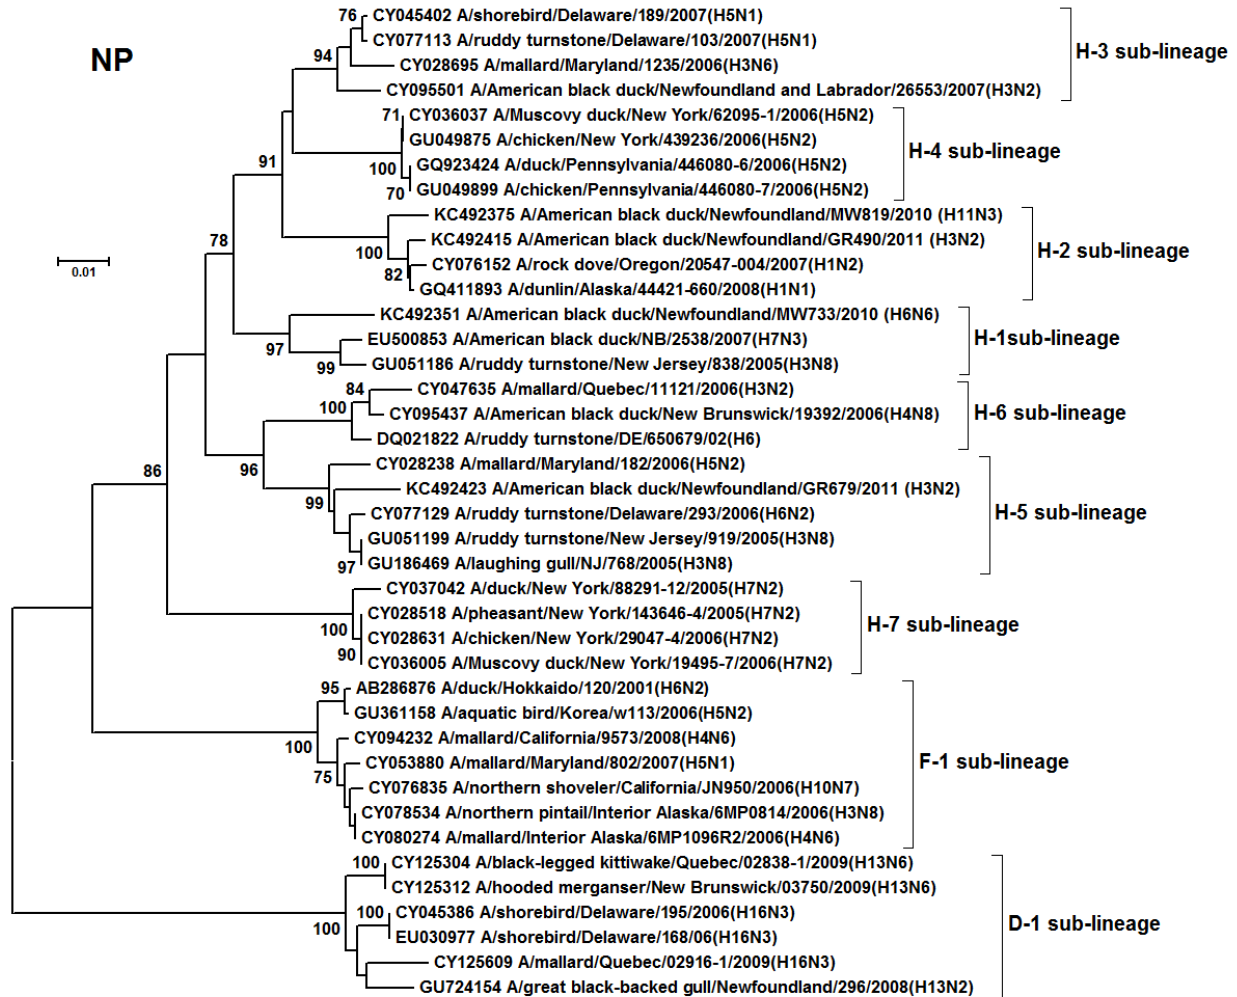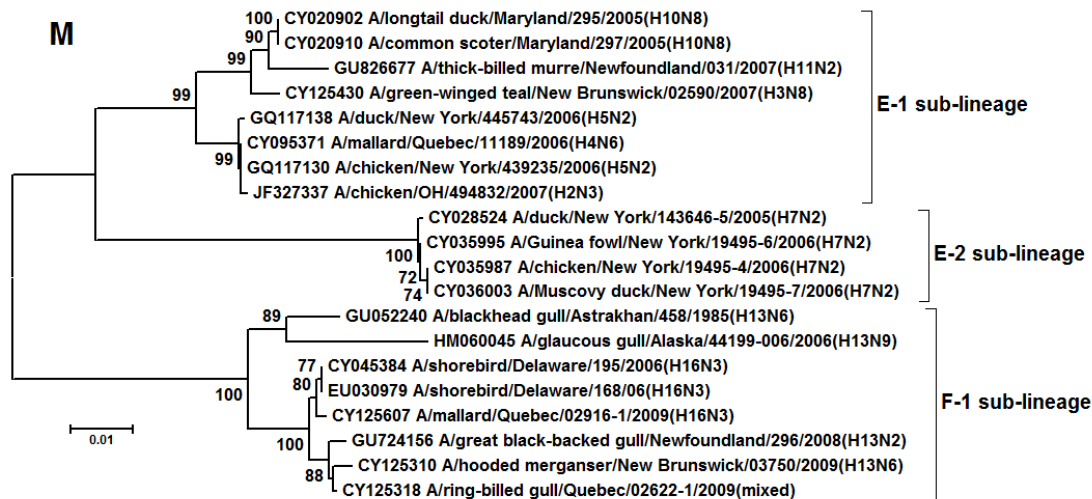

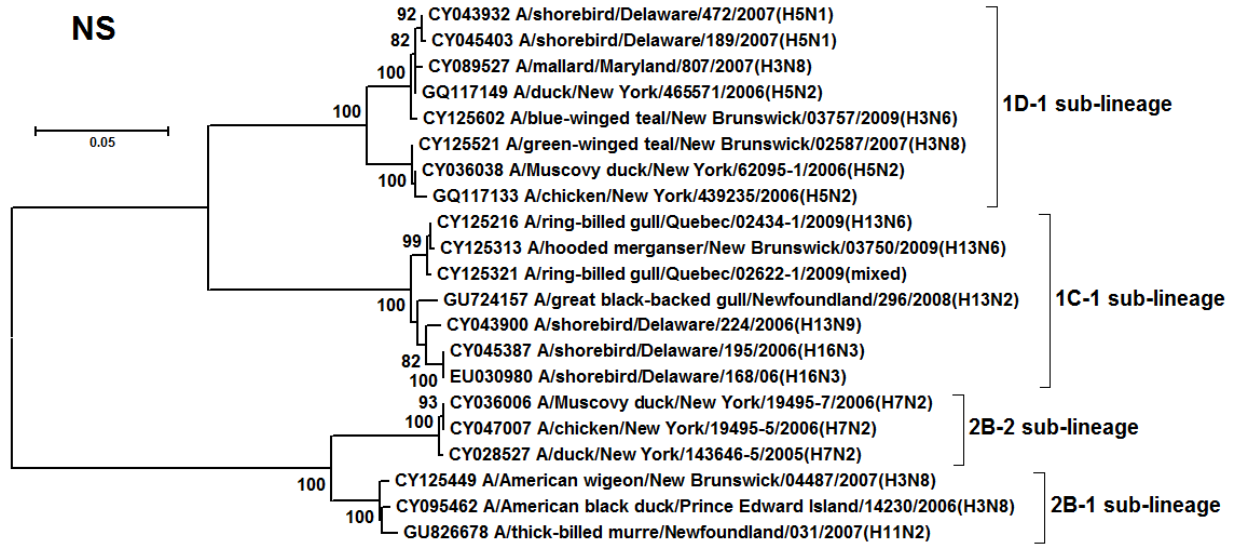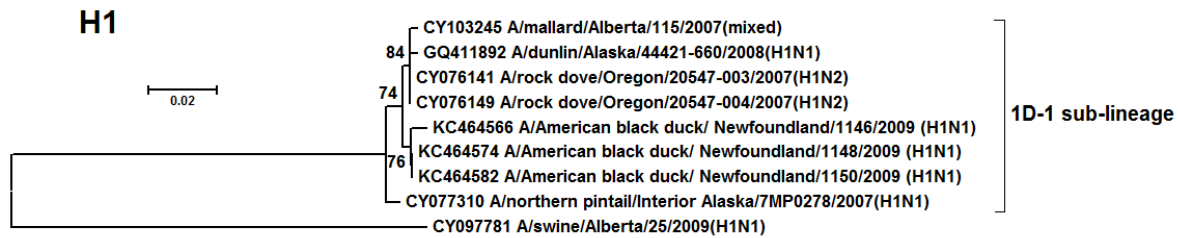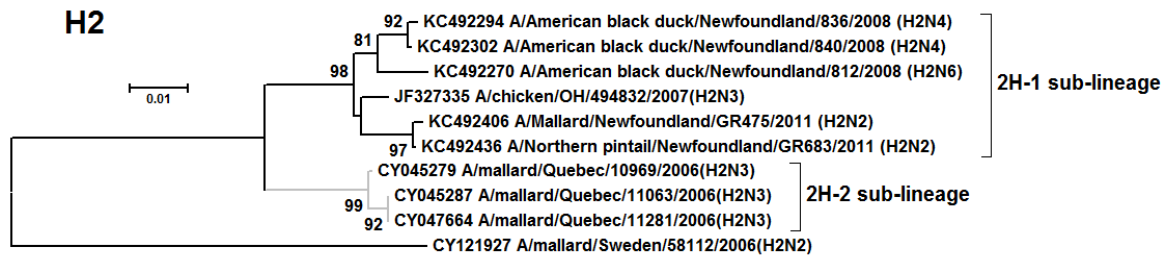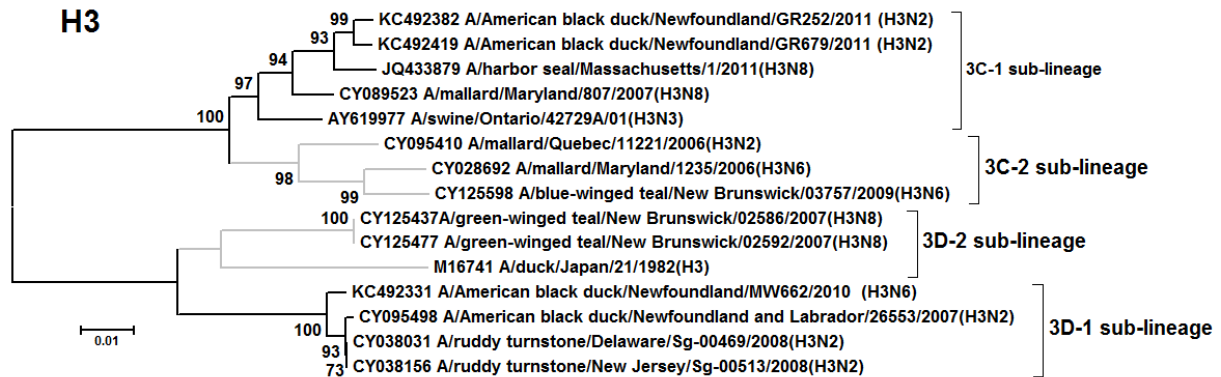

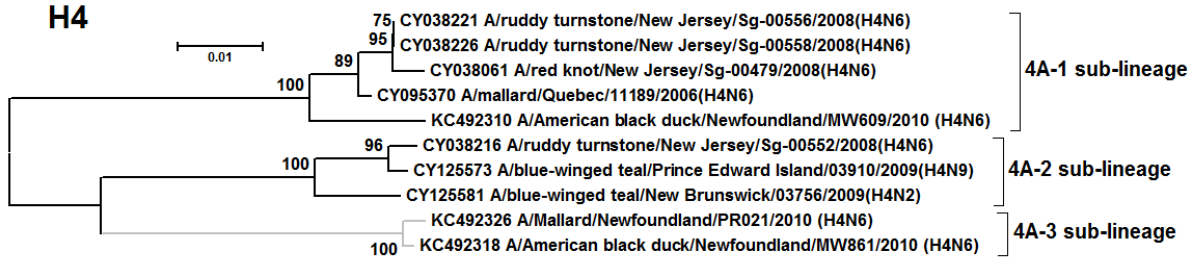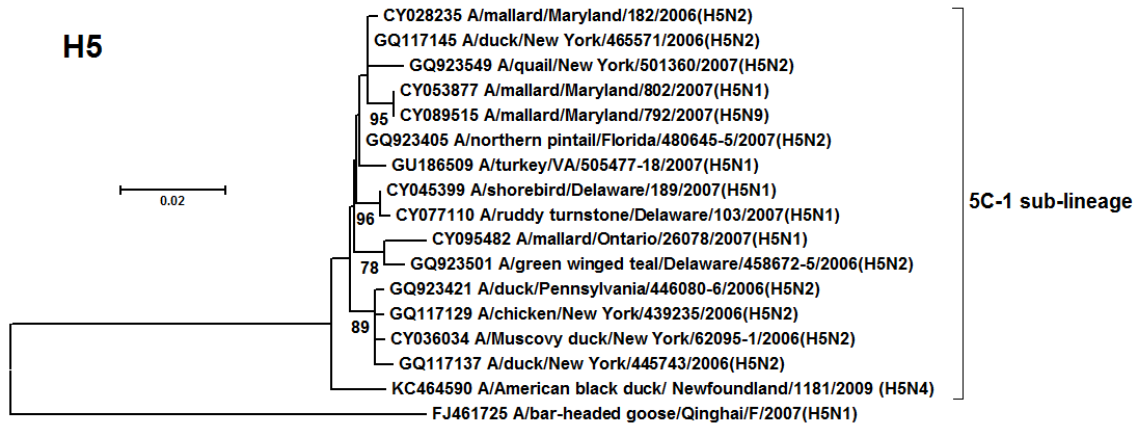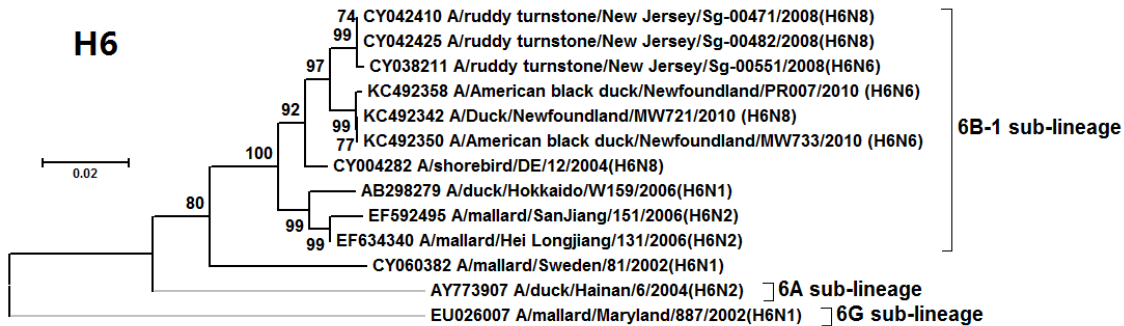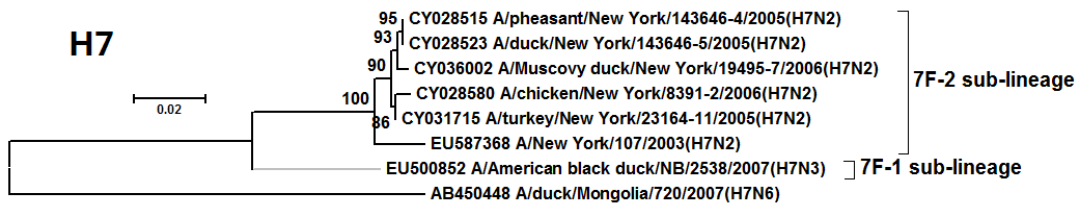

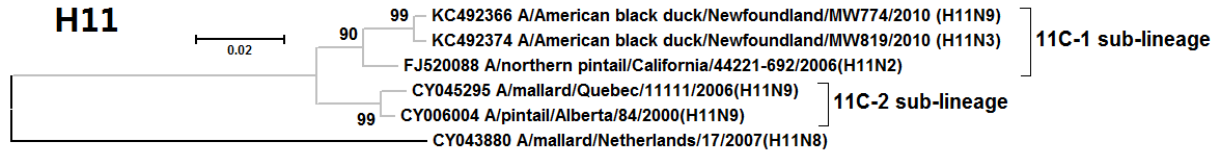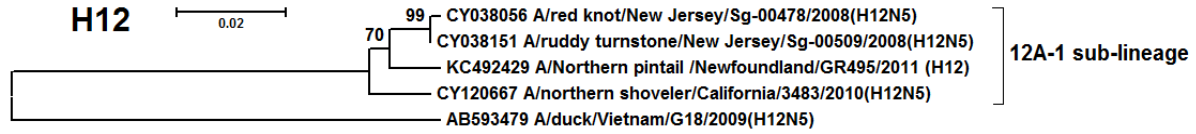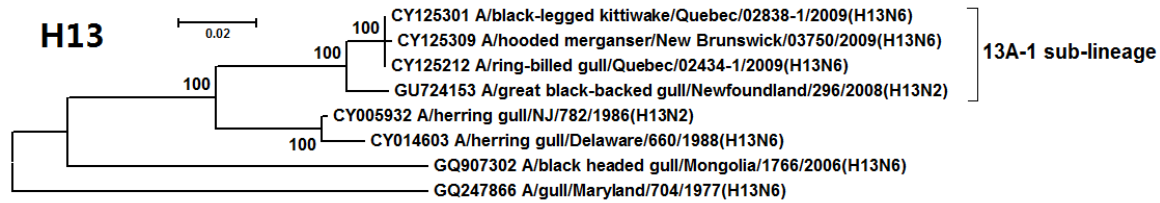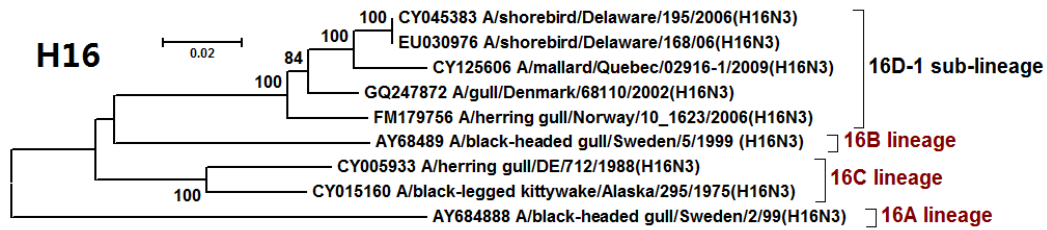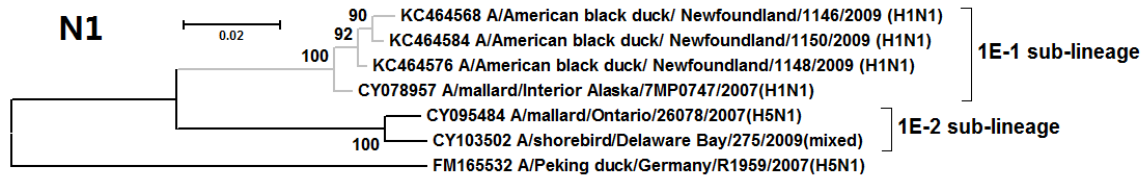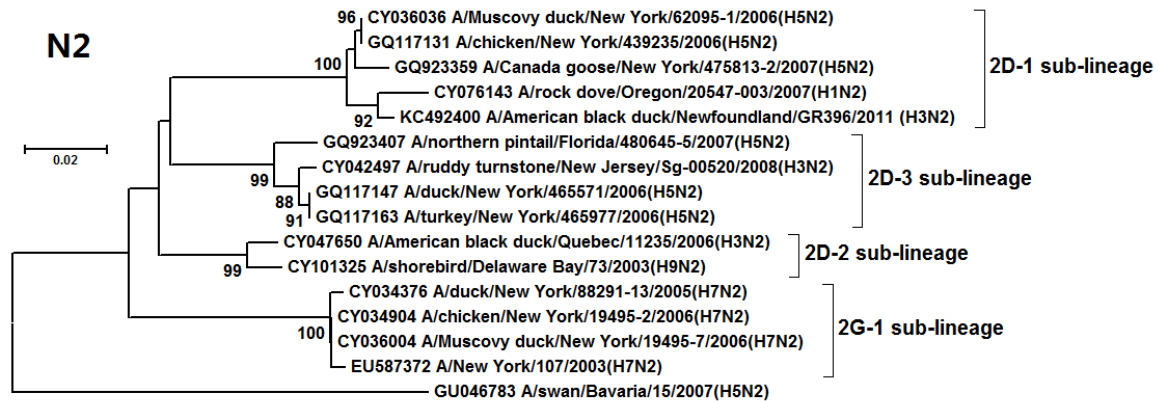



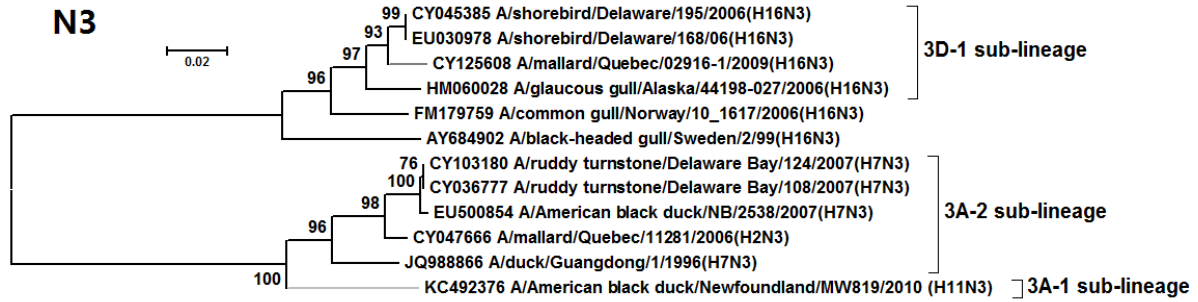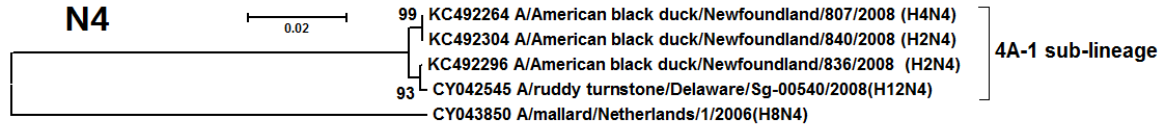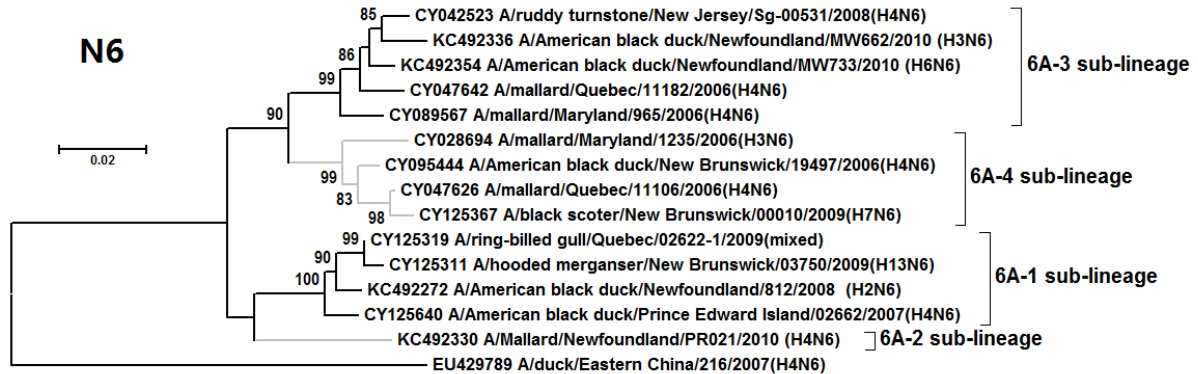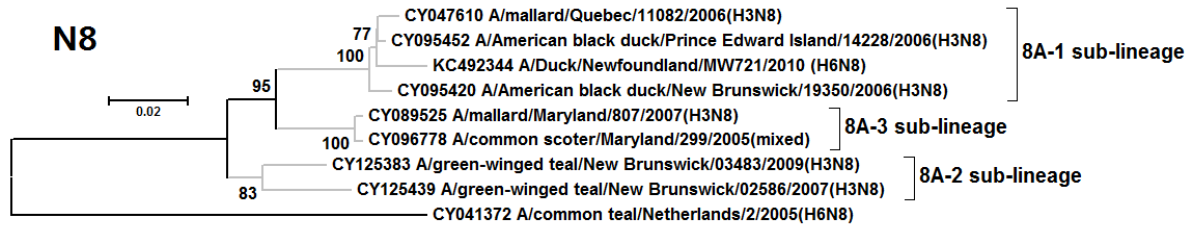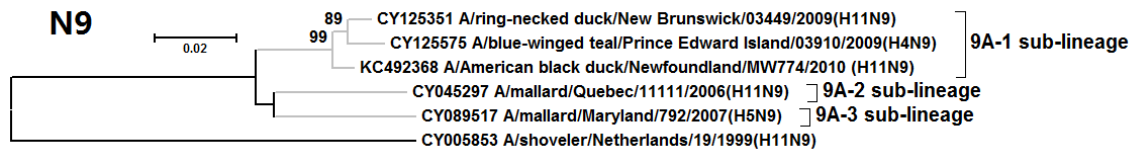

Supplement: pone.0086999.s002.pdf [file pone.0086999.s002.pdf]
