# Supplementary material for: Genetic Structure of Avian Influenza Viruses from Ducks of the Atlantic Flyway of North America
Source: PubMed Central journal article supplement (PMC3907406; doi:10.1371/journal.pone.0086999), 2014-01-30

**Figure S4. Distribution of the AIV gene types from Atlantic flyway ducks by location.** Gene typing was done as described in the Materials and Methods section such that sequences with nucleotide identity of  $\geq 99\%$  are considered as homologous genes or the same gene type. Sequences from different locations within the Atlantic bird flyway are shown in different colours, as indicated in the legend. The locations are abbreviated as follows: NL, Newfoundland; QC, Quebec; MD, Maryland; NB, New Brunswick; PEI, Prince Edward Island; NY, New York; PA, Pennsylvania; DE, Delaware; ON, Ontario; FL, Florida; NS, Nova Scotia. The 18 gene types detected only in Newfoundland are labeled with asterisk (\*).

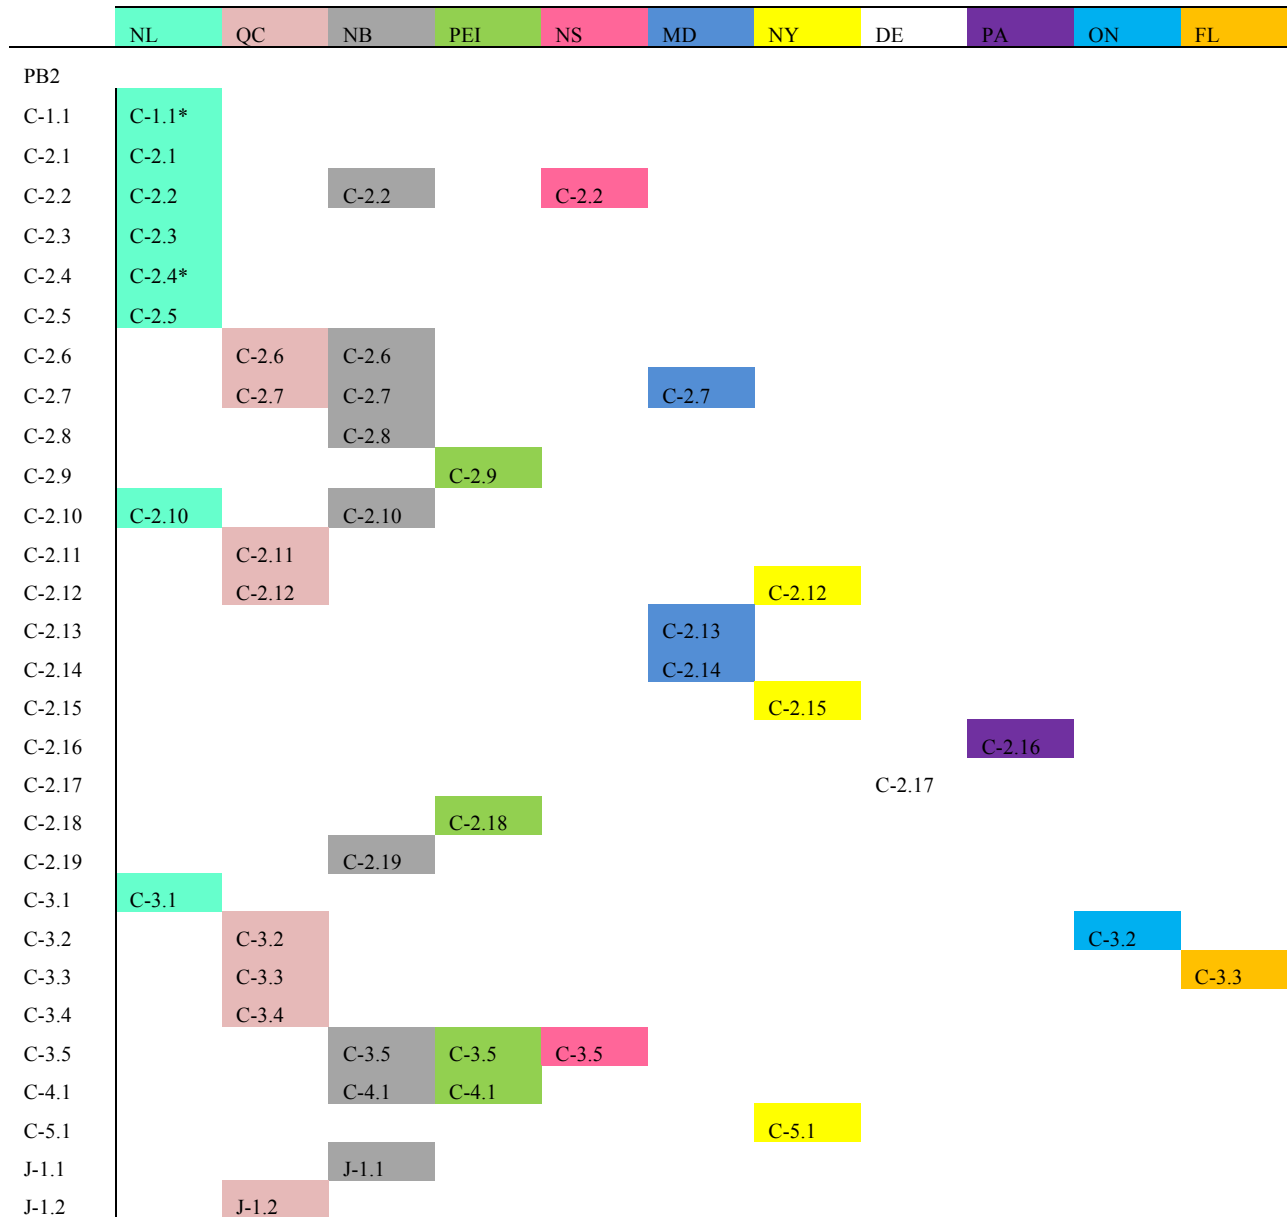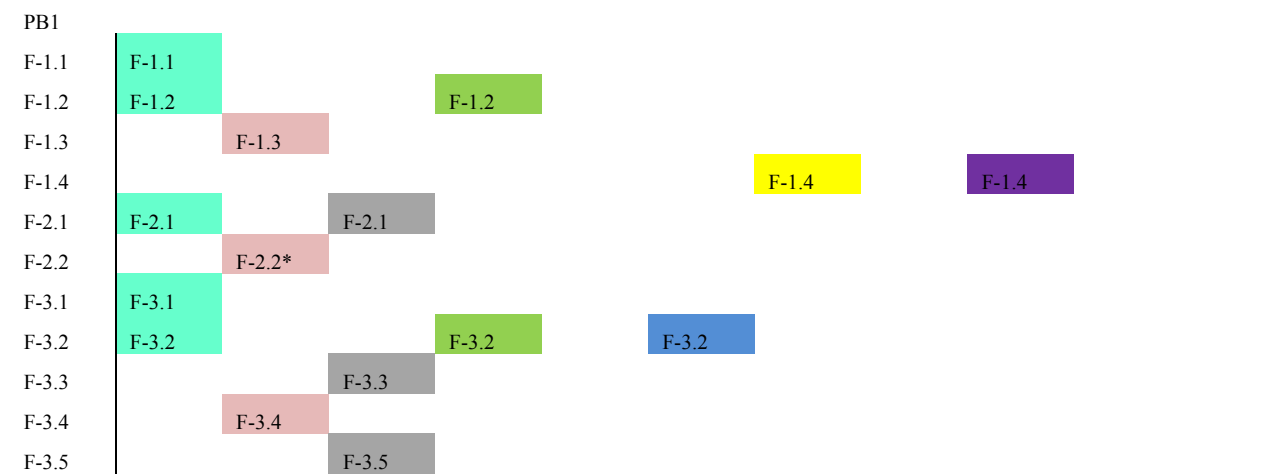

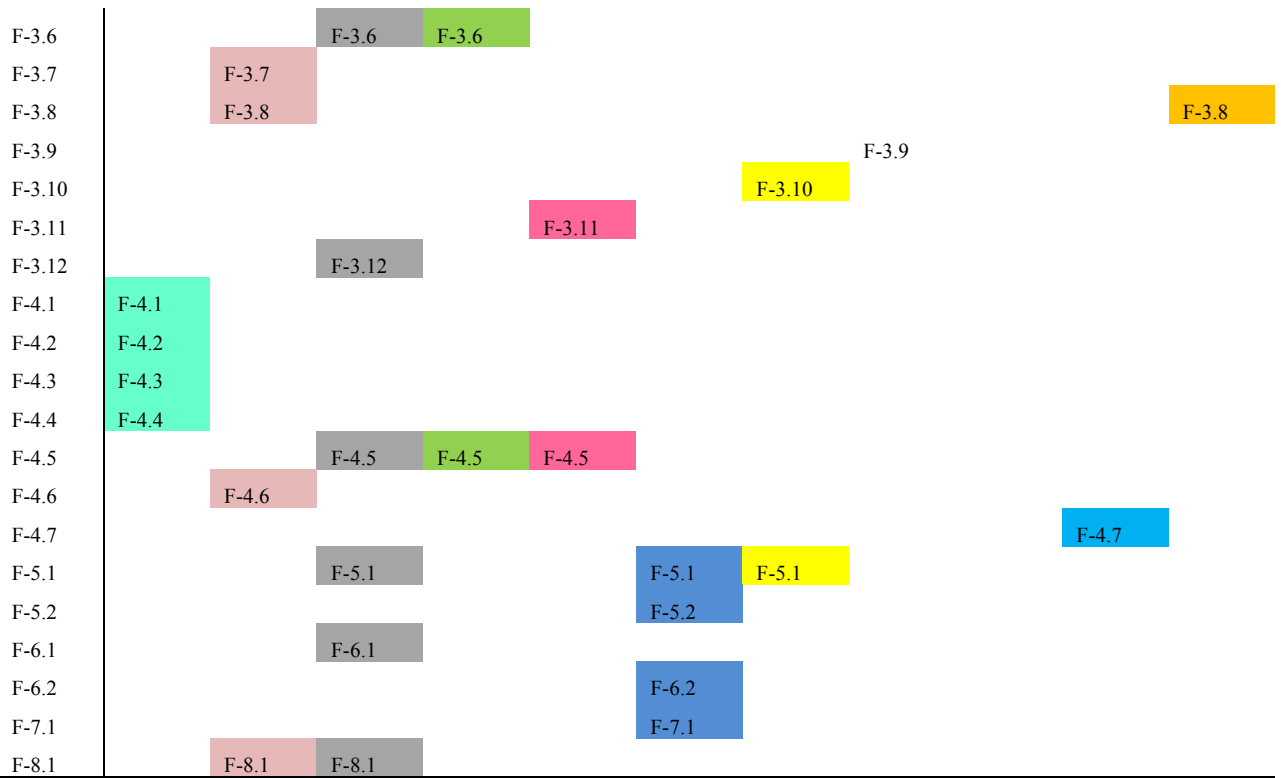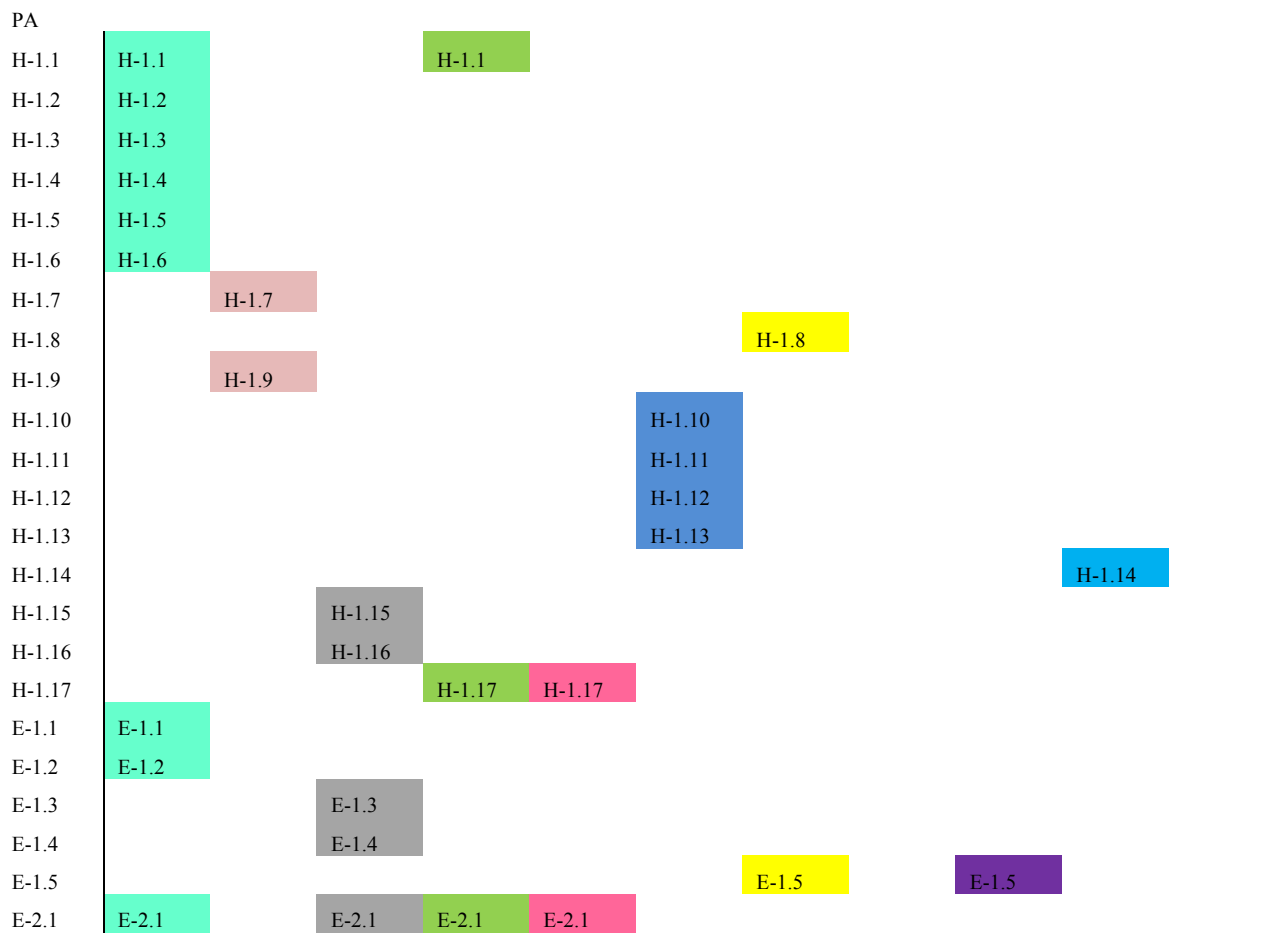

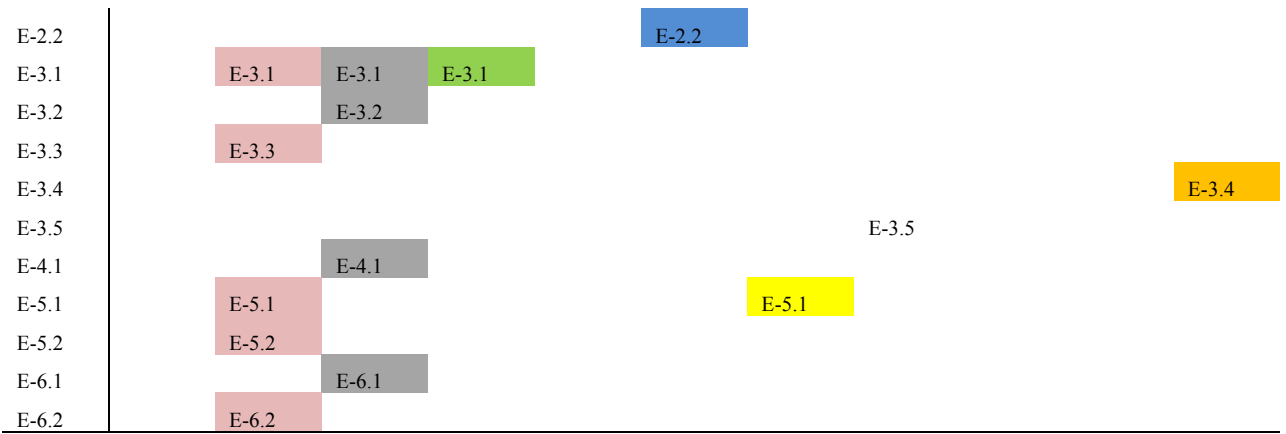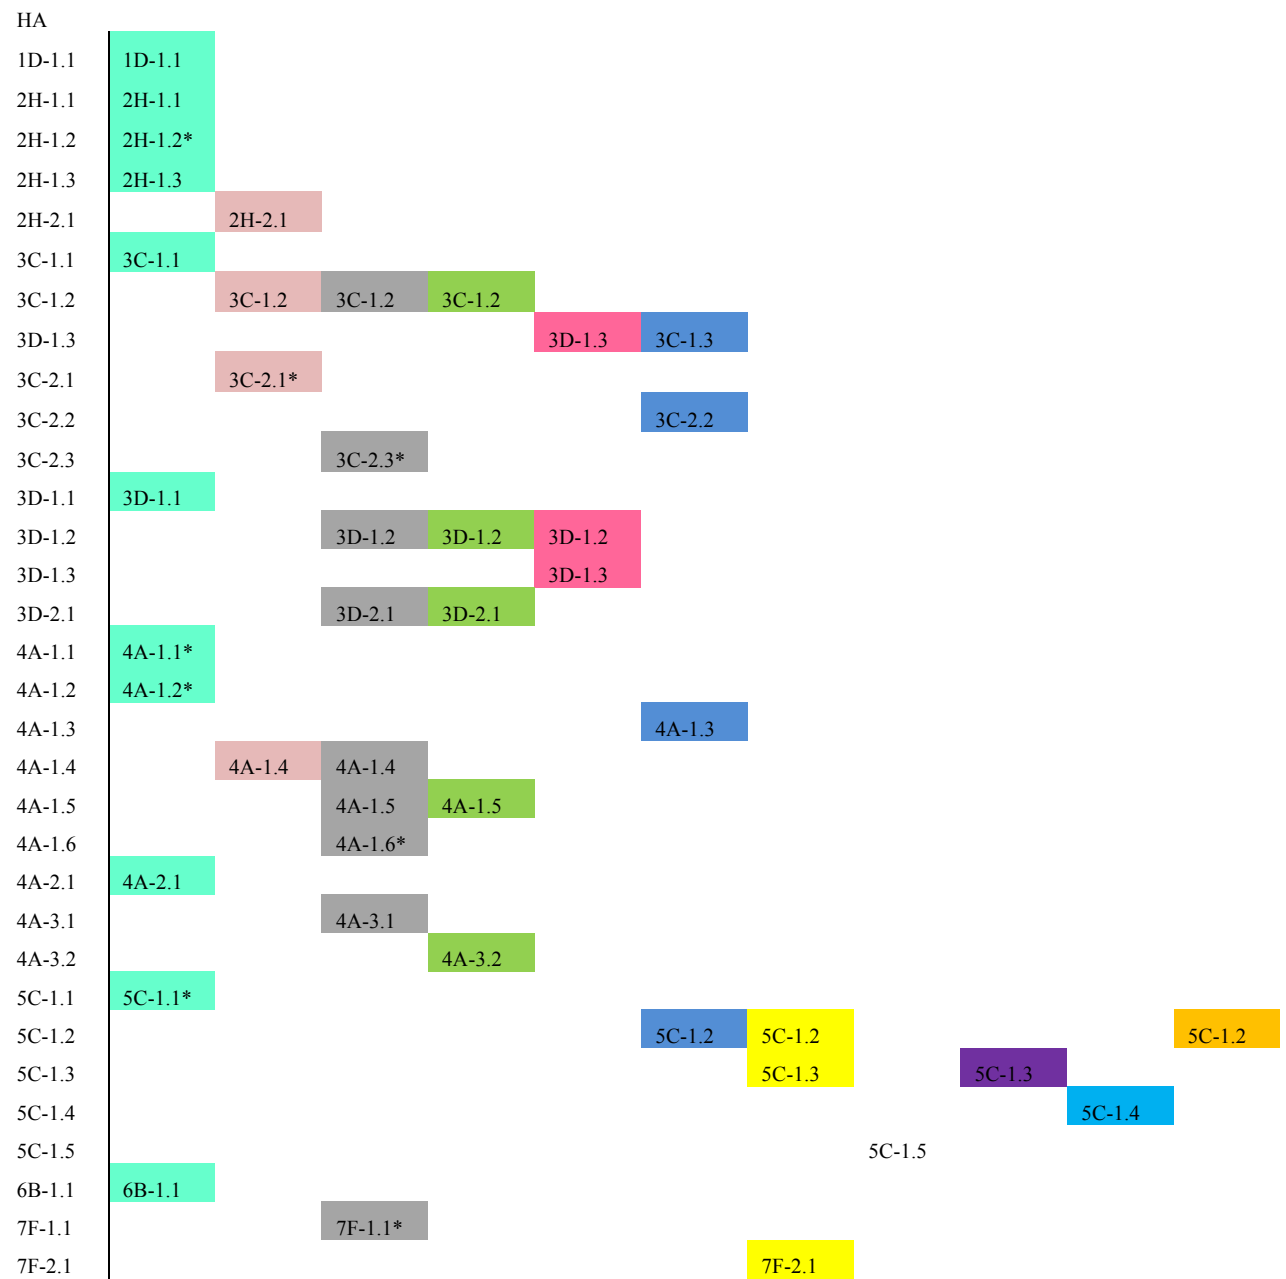

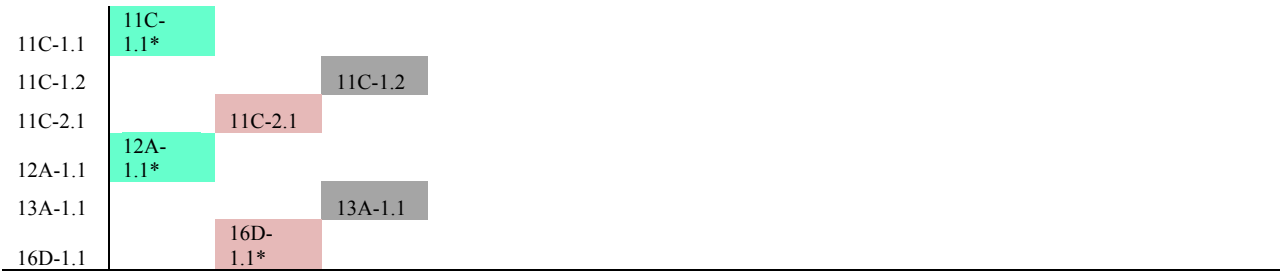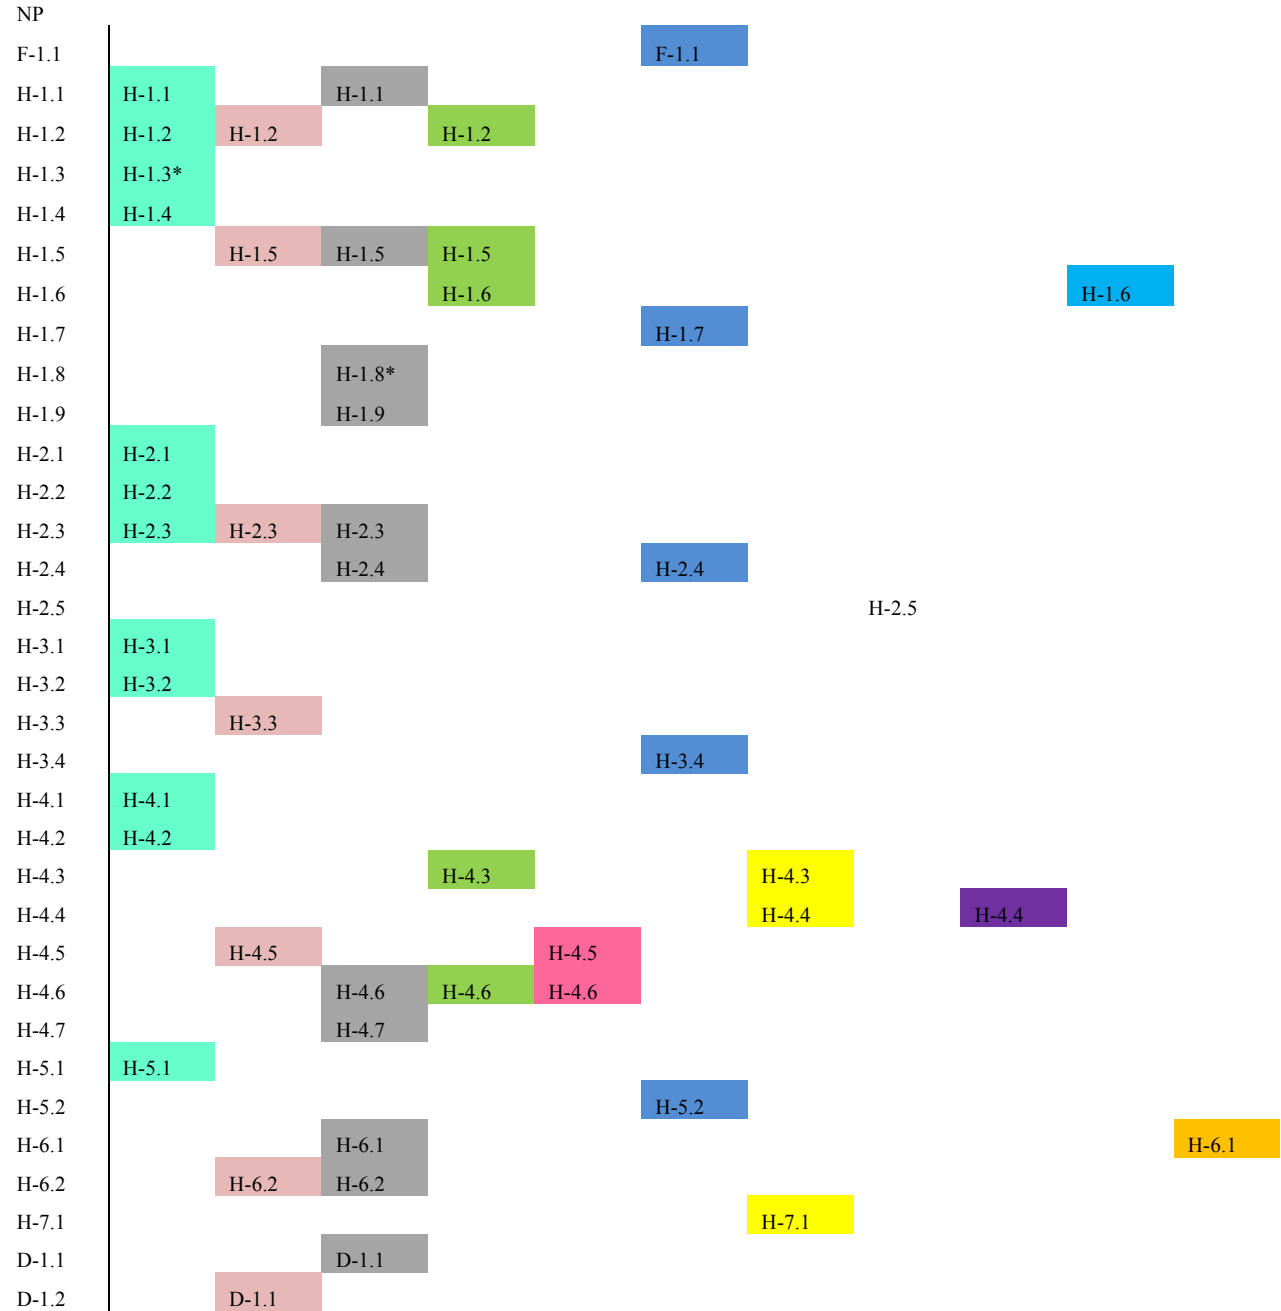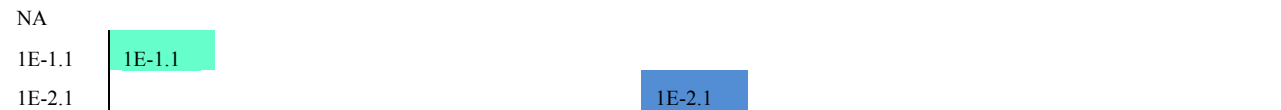

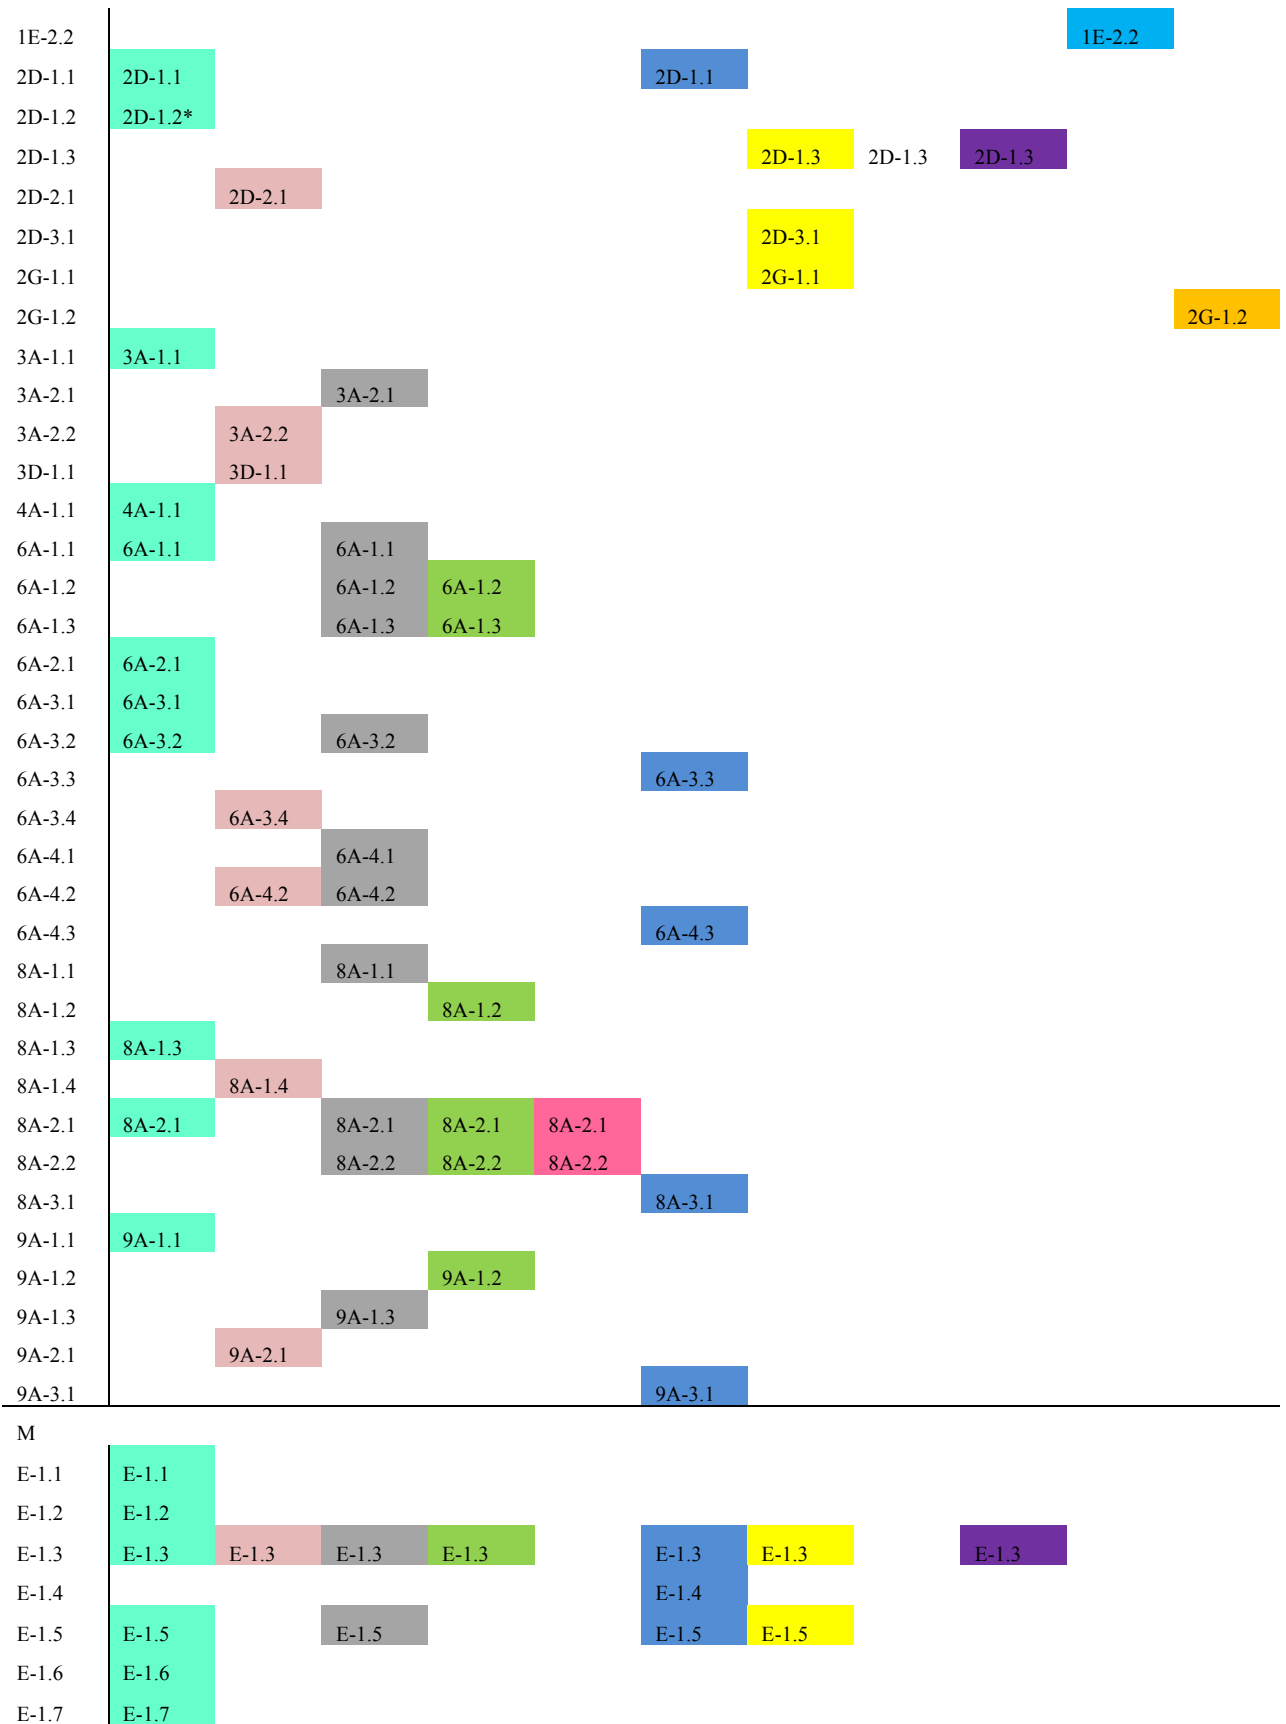

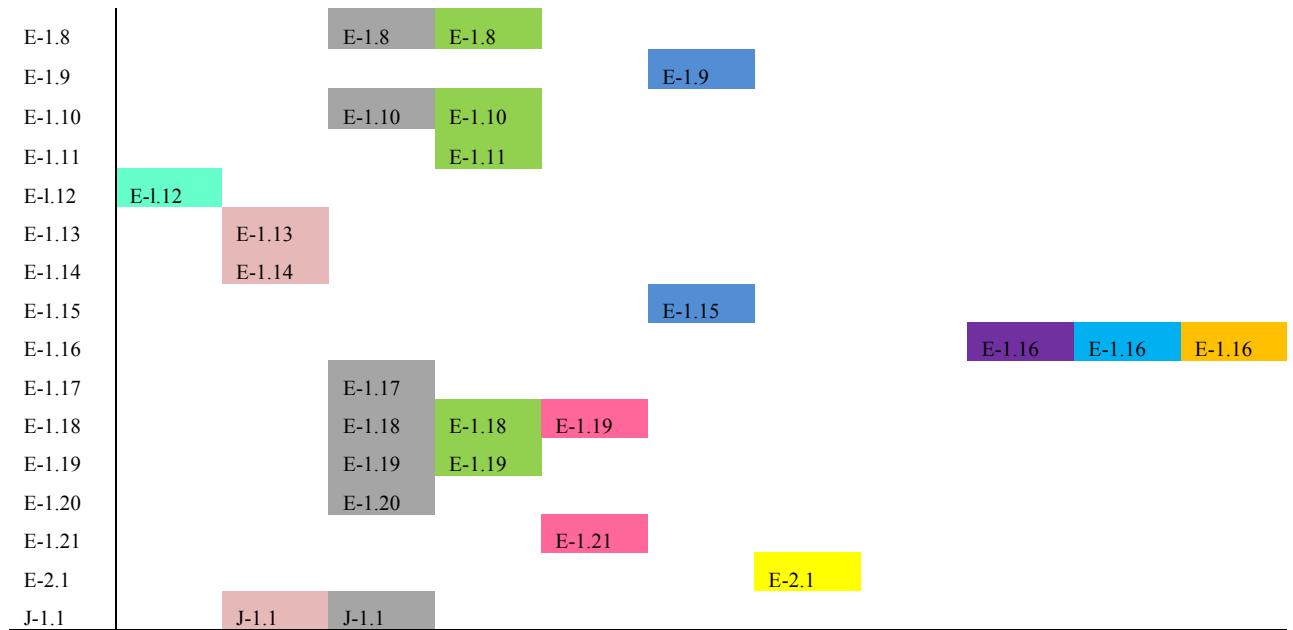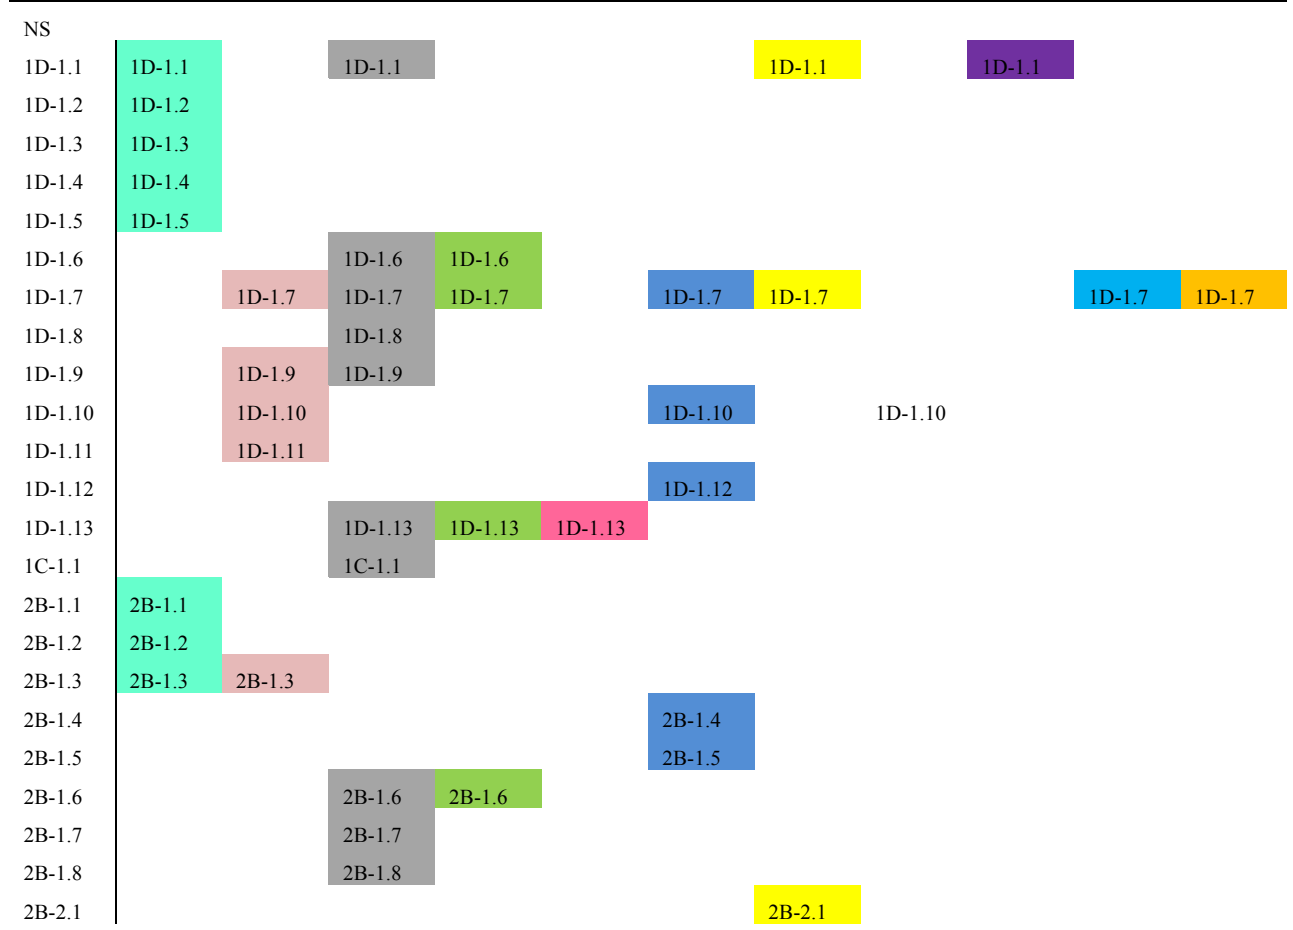

Supplement: pone.0086999.s004.pdf [file pone.0086999.s004.pdf]
