# Supplementary material for: Genetic Structure of Avian Influenza Viruses from Ducks of the Atlantic Flyway of North America
Source: PubMed Central journal article supplement (PMC3907406; doi:10.1371/journal.pone.0086999), 2014-01-30
Supplement: pone.0086999.s003.pdf [file pone.0086999.s003.pdf]

**Figure S3. Gene type categorization of the Atlantic flyway duck AIVs by year and location.**

Gene typing was done as described in the Materials and Methods section such that sequences with nucleotide identity of  $\geq 99\%$  are considered as homologous genes or the same gene type.

Sequences from different locations within the Atlantic bird flyway are shown in different colours, as indicated in the legend. The locations are abbreviated as follows: NL, Newfoundland; QC, Quebec; MD, Maryland; NB, New Brunswick; PEI, Prince Edward Island; NY, New York; PA, Pennsylvania; DE, Delaware; ON, Ontario; FL, Florida; NS, Nova Scotia.

|        |        | PB2    |        |       |        |       |       |
|--------|--------|--------|--------|-------|--------|-------|-------|
|        |        | 2006   | 2007   | 2008  | 2009   | 2010  | 2011  |
| C-2.6  | C-2.7  | C-2.6  | C-2.7  | C-1.1 | C-2.1  | C-2.1 | C-2.2 |
| C-2.7  | C-2.13 | C-2.6  | C-2.7  | C-1.1 | C-2.1  | C-2.1 | C-2.2 |
| C-2.7  | C-2.14 | C-2.6  | C-2.7  | C-1.1 | C-2.1  | C-2.1 | C-2.2 |
| C-2.11 | C-2.6  | C-2.6  | C-4.1  | C-1.1 | C-2.4  | C-2.3 | C-2.2 |
| C-2.12 | C-2.6  | C-2.6  | C-4.1  | C-1.1 | C-2.18 | C-2.3 | C-2.2 |
| C-2.12 | C-2.6  | C-2.6  | C-2.10 | C-1.1 | C-2.18 | C-2.3 | C-2.2 |
| C-2.12 | C-2.7  | C-2.6  | C-2.10 | C-2.2 | C-3.5  | C-2.4 | C-2.5 |
| C-2.12 | C-2.10 | C-2.6  | C-3.2  | C-2.2 | C-3.5  | C-2.4 | C-3.1 |
| C-2.12 | C-2.10 | C-2.6  | C-3.3  |       | C-3.5  | C-2.5 |       |
| C-2.12 | C-2.9  | C-2.6  |        |       | J-1.2  |       |       |
| C-2.12 | C-4.1  | C-2.6  |        |       | C-2.2  |       |       |
| C-2.12 | C-4.1  | C-2.7  |        |       | C-2.2  |       |       |
| C-2.12 | C-2.12 | C-2.19 |        |       | C-2.8  |       |       |
| C-3.2  | C-2.12 | C-2.19 |        |       | C-3.5  |       |       |
| C-3.2  | C-2.15 | C-2.19 |        |       | C-3.5  |       |       |
| C-3.2  | C-5.1  | C-2.19 |        |       | C-3.5  |       |       |
| C-3.3  | C-2.17 | C-2.19 |        |       | C-3.5  |       |       |
| C-3.3  | C-2.16 | C-2.19 |        |       | J-1.1  |       |       |
| C-3.4  |        | C-4.1  |        |       |        |       |       |

  

| Legend |    |
|--------|----|
| NL     | DE |
| QC     | MD |
| NB     | FL |
| NS     | PA |
| PEI    | NY |
| ON     |    |

|       |        | PB1   |       |       |        |       |       |
|-------|--------|-------|-------|-------|--------|-------|-------|
|       |        | 2006  | 2007  | 2008  | 2009   | 2010  | 2011  |
| F-1.3 | F-3.2  | F-3.5 | F-5.2 | F-3.2 | F-3.1  | F-1.1 | F-1.1 |
| F-1.3 | F-5.1  | F-3.5 | F-5.2 | F-3.2 | F-3.1  | F-1.1 | F-2.1 |
| F-2.2 | F-6.2  | F-3.5 | F-7.1 | F-3.2 | F-3.1  | F-1.2 | F-2.1 |
| F-3.4 | F-3.3  | F-3.5 | F-3.6 | F-3.2 | F-3.1  | F-1.2 | F-2.1 |
| F-3.4 | F-3.5  | F-3.5 | F-3.6 | F-3.2 | F-1.2  | F-3.1 | F-4.1 |
| F-3.4 | F-3.5  | F-3.5 | F-3.2 | F-3.2 | F-3.6  | F-3.1 | F-4.1 |
| F-3.4 | F-5.1  | F-3.5 | F-3.2 | F-4.2 | F-4.5  | F-3.1 | F-4.1 |
| F-3.4 | F-5.1  | F-3.5 | F-4.7 | F-4.2 | F-4.5  | F-3.1 | F-4.4 |
| F-3.4 | F-5.1  | F-3.5 | F-3.8 |       | F-4.5  | F-4.3 |       |
| F-3.4 | F-3.2  | F-3.5 |       |       | F-8.1  |       |       |
| F-3.4 | F-3.6  | F-3.6 |       |       | F-2.1  |       |       |
| F-3.4 | F-3.6  | F-3.6 |       |       | F-3.11 |       |       |
| F-3.7 | F-1.4  | F-3.6 |       |       | F-3.12 |       |       |
| F-3.7 | F-1.4  | F-3.6 |       |       | F-3.12 |       |       |
| F-3.8 | F-5.1  | F-3.6 |       |       | F-4.5  |       |       |
| F-4.6 | F-3.10 | F-3.6 |       |       | F-4.5  |       |       |
| F-4.6 | F-3.9  | F-3.6 |       |       | F-4.5  |       |       |
| F-4.6 | F-1.4  | F-4.5 |       |       | F-8.1  |       |       |
| F-4.6 |        | F-6.1 |       |       |        |       |       |

|       |        | PA    |        |       |       |       |       |
|-------|--------|-------|--------|-------|-------|-------|-------|
|       |        | 2006  | 2007   | 2008  | 2009  | 2010  | 2011  |
| E-3.1 | E-2.2  | E-1.3 | H-1.12 | E-2.1 | E-1.1 | E-1.1 | E-1.2 |
| E-3.3 | H-1.10 | E-1.4 | H-1.13 | E-2.1 | E-1.1 | E-1.1 | E-2.1 |

|       |        |        |        |       |        |       |       |
|-------|--------|--------|--------|-------|--------|-------|-------|
| E-5.1 | H-1.11 | H-1.17 | H-1.13 | E-2.1 | E-1.1  | H-1.4 | E-2.1 |
| E-5.1 | E-3.2  | H-1.17 | H-1.1  | H-1.1 | H-1.3  | H-1.4 | E-2.1 |
| E-5.1 | E-3.1  | H-1.17 | E-3.1  | H-1.1 | E-2.1  | H-1.4 | E-2.1 |
| E-5.2 | E-3.2  | H-1.17 | H-1.6  | H-1.1 | E-2.1  | H-1.4 | E-2.1 |
| E-5.2 | E-4.1  | H-1.17 | H-1.6  | H-1.1 | H-1.17 | H-1.5 | H-1.2 |
| E-5.2 | E-4.1  | H-1.17 | H-1.14 | H-1.1 | E-2.1  | H-1.5 | H-1.5 |
| H-1.7 | E-4.1  | E-3.1  | E-3.4  |       | E-2.1  | H-1.5 |       |
| H-1.7 | H-1.1  | E-4.1  |        |       | E-6.2  |       |       |
| H-1.7 | H-1.1  | E-4.1  |        |       | E-2.1  |       |       |
| H-1.7 | H-1.1  | E-4.1  |        |       | E-2.1  |       |       |
| H-1.7 | E-1.5  | E-4.1  |        |       | E-2.1  |       |       |
| H-1.7 | E-1.5  | E-4.1  |        |       | E-6.1  |       |       |
| H-1.7 | E-5.1  | E-4.1  |        |       | H-1.15 |       |       |
| H-1.7 | H-1.8  | E-4.1  |        |       | H-1.15 |       |       |
| H-1.7 | E-3.5  | E-4.1  |        |       | H-1.16 |       |       |
| H-1.7 | E-1.5  | E-4.1  |        |       | H-1.17 |       |       |
| H-1.9 |        | E-4.1  |        |       |        |       |       |

HA

|         | 2006   |        | 2007   |        | 2008   |         | 2009    |         | 2010 |  | 2011 |
|---------|--------|--------|--------|--------|--------|---------|---------|---------|------|--|------|
| 2H-2.1  | 3C-2.2 | 3C-1.2 | 3C-1.2 | 3C-1.3 | 2H-1.2 | 1D-1.1  | 3D-1.1  | 2H-1.1  |      |  |      |
| 2H-2.1  | 4A-1.3 | 3C-1.2 | 3C-1.2 | 5C-1.2 | 2H-1.2 | 1D-1.1  | 4A-1.2  | 2H-1.1  |      |  |      |
| 2H-2.1  | 5C-1.2 | 3C-1.2 | 3C-1.2 | 5C-1.2 | 2H-1.3 | 1D-1.1  | 4A-2.1  | 3C-1.1  |      |  |      |
| 3C-1.2  | 3C-1.2 | 3C-1.2 | 3C-1.2 | 4A-1.5 | 3D-1.1 | 5C-1.1  | 4A-2.1  | 3C-1.1  |      |  |      |
| 3C-2.1  | 4A-1.4 | 3C-1.2 | 3C-1.2 | 4A-1.5 | 3D-1.1 | 3D-1.2  | 6B-1.1  | 3C-1.1  |      |  |      |
| 3C-2.1  | 4A-1.6 | 3C-1.2 | 3C-1.2 | 3D-1.1 | 4A-1.1 | 3D-2.1  | 6B-1.1  | 3C-1.1  |      |  |      |
| 3C-2.1  | 4A-1.6 | 3C-1.2 | 3C-1.2 | 3D-1.1 | 4A-1.1 | 4A-3.2  | 6B-1.1  | 3C-1.1  |      |  |      |
| 3C-2.1  | 4A-1.6 | 3C-1.2 | 3C-1.2 | 5C-1.4 | 4A-1.1 | 3D-1.2  | 11C-1.1 | 12A-1.1 |      |  |      |
| 3C-2.1  | 4A-1.6 | 3C-1.2 | 3C-1.2 | 5C-1.2 |        | 3D-1.2  | 11C-1.1 |         |      |  |      |
| 3C-2.1  | 3C-1.2 | 3C-1.2 | 3C-1.2 |        |        | 16D-1.1 |         |         |      |  |      |
| 3C-2.1  | 3C-1.2 | 3C-2.3 | 3C-2.3 |        |        | 3C-2.3  |         |         |      |  |      |
| 3C-2.1  | 4A-1.5 | 3D-2.1 | 3D-2.1 |        |        | 3D-1.2  |         |         |      |  |      |
| 3C-2.1  | 5C-1.2 | 3D-2.1 | 3D-2.1 |        |        | 3D-1.2  |         |         |      |  |      |
| 4A-1.4  | 5C-1.3 | 3D-2.1 | 3D-2.1 |        |        | 3D-1.2  |         |         |      |  |      |
| 4A-1.4  | 5C-1.3 | 3D-2.1 | 3D-2.1 |        |        | 3D-1.3  |         |         |      |  |      |
| 4A-1.4  | 7F-2.1 | 3D-2.1 | 3D-2.1 |        |        | 4A-3.1  |         |         |      |  |      |
| 4A-1.4  | 5C-1.5 | 3D-2.1 | 3D-2.1 |        |        | 11C-1.2 |         |         |      |  |      |
| 4A-1.4  | 5C-1.3 | 4A-1.5 | 4A-1.5 |        |        | 13A-1.1 |         |         |      |  |      |
| 11C-2.1 |        | 7F-1.1 | 7F-1.1 |        |        |         |         |         |      |  |      |

NP

|       | 2006  |       | 2007  |       | 2008  |       | 2009  |       | 2010 |  | 2011 |
|-------|-------|-------|-------|-------|-------|-------|-------|-------|------|--|------|
| H-1.2 | H-2.4 | H-1.5 | H-1.7 | H-1.7 | H-1.2 | H-4.1 | H-1.1 | H-1.4 |      |  |      |
| H-1.5 | H-3.4 | H-1.5 | H-1.7 | H-1.7 | H-1.2 | H-4.1 | H-1.1 | H-2.1 |      |  |      |
| H-1.5 | H-5.2 | H-1.8 | F-1.1 | F-1.1 | H-1.2 | H-4.1 | H-1.1 | H-2.1 |      |  |      |
| H-1.5 | H-1.8 | H-1.8 | H-1.5 | H-1.5 | H-3.1 | H-4.2 | H-1.1 | H-2.1 |      |  |      |
| H-1.5 | H-2.3 | H-1.8 | H-4.3 | H-4.3 | H-3.1 | H-1.6 | H-1.3 | H-2.1 |      |  |      |
| H-1.5 | H-6.1 | H-1.8 | H-2.3 | H-2.3 | H-3.1 | H-1.6 | H-1.3 | H-2.1 |      |  |      |

|       |       |       |       |       |       |       |       |
|-------|-------|-------|-------|-------|-------|-------|-------|
| H-2.3 | H-6.1 | H-1.8 | H-3.2 | H-3.1 | H-4.6 | H-2.1 | H-5.1 |
| H-3.3 | H-6.1 | H-1.8 | H-1.6 | H-3.1 | H-4.6 | H-2.2 | H-5.1 |
| H-3.3 | H-6.2 | H-1.8 | H-6.1 |       | H-4.6 | H-2.2 |       |
| H-4.5 | H-1.2 | H-1.8 |       |       | D-1.1 |       |       |
| H-6.2 | H-1.2 | H-1.8 |       |       | H-1.1 |       |       |
| H-6.2 | H-4.3 | H-1.8 |       |       | H-1.1 |       |       |
| H-6.2 | H-4.3 | H-2.4 |       |       | H-1.9 |       |       |
| H-6.2 | H-4.4 | H-4.7 |       |       | H-4.5 |       |       |
| H-6.2 | H-4.4 | H-4.7 |       |       | H-4.6 |       |       |
| H-6.2 | H-7.1 | H-4.7 |       |       | H-4.6 |       |       |
| H-6.2 | H-2.5 | H-4.7 |       |       | H-4.6 |       |       |
| H-6.2 | H-4.4 | H-4.7 |       |       | D-1.1 |       |       |
| H-6.2 |       | H-4.7 |       |       |       |       |       |

NA

|        | 2006   |        | 2007    |        | 2008   |        | 2009   |  | 2010 |  | 2011 |
|--------|--------|--------|---------|--------|--------|--------|--------|--|------|--|------|
| 2D-2.1 | 2D-1.1 | 3A-2.1 | 1E- 2.1 | 4A-1.1 | 1E-1.1 | 3A-1.1 | 2D     |  |      |  |      |
| 2D-2.1 | 6A-3.3 | 6A-1.3 | 8A-3.1  | 4A-1.1 | 1E-1.1 | 6A-2.1 | 2D     |  |      |  |      |
| 2D-2.1 | 6A-4.3 | 6A-4.2 | 9A-3.1  | 4A-1.1 | 1E-1.1 | 6A-2.1 | 2D     |  |      |  |      |
| 2D-2.1 | 6A-1.1 | 8A-1.1 | 6A-1.3  | 6A-1.1 | 4A     | 6A-2.1 | 2D     |  |      |  |      |
| 2D-2.1 | 6A-4.1 | 8A-1.1 | 6A-1.3  | 6A-1.1 | 8A-2.1 | 6A-2.1 | 2D     |  |      |  |      |
| 2D-2.1 | 6A-4.1 | 8A-1.1 | 2D-1.1  | 6A-1.1 | 8A-2.2 | 6A-3.1 | 2D-1.1 |  |      |  |      |
| 2D-2.1 | 8A-1.1 | 8A-1.1 | 2D-1.1  | 8A     | 9A-1.2 | 6A-3.2 | 2D-1.2 |  |      |  |      |
| 2D-2.1 | 8A-1.1 | 8A-1.1 | 1E- 2.2 | 8A-2.1 | 8A-2.1 | 8A-1.3 | -      |  |      |  |      |
| 2D-2.1 | 8A-1.1 | 8A-1.1 | 2G-1.2  |        | 8A-2.1 | 9A-1.1 |        |  |      |  |      |
| 3A-2.2 | 6A-1.2 | 8A-1.1 |         |        | 3D-1.1 |        |        |  |      |  |      |
| 3A-2.2 | 8A-1.2 | 8A-1.1 |         |        | 2D-1.1 |        |        |  |      |  |      |
| 3A-2.2 | 8A-1.2 | 8A-1.1 |         |        | 6A-1.2 |        |        |  |      |  |      |
| 6A-3.4 | 2D-1.3 | 8A-1.1 |         |        | 6A-3.2 |        |        |  |      |  |      |
| 6A-4.2 | 2D-1.3 | 8A-2.2 |         |        | 8A-2.1 |        |        |  |      |  |      |
| 6A-4.2 | 2D-3.1 | 8A-2.2 |         |        | 8A-2.1 |        |        |  |      |  |      |
| 6A-4.2 | 2G-1.1 | 8A-2.2 |         |        | 8A-2.1 |        |        |  |      |  |      |
| 6A-4.2 | 2D-1.3 | 8A-2.2 |         |        | 8A-2.2 |        |        |  |      |  |      |
| 8A-1.4 | 2D-1.3 | 8A-2.2 |         |        | 9A-1.3 |        |        |  |      |  |      |
| 9A-2.1 |        | 8A-2.2 |         |        |        |        |        |  |      |  |      |

M

|       | 2006   |        | 2007   |       | 2008  |        | 2009  |       | 2010 |  | 2011 |
|-------|--------|--------|--------|-------|-------|--------|-------|-------|------|--|------|
| E-1.3 | E-1.3  | E-1.5  | E-1.9  | E-1.3 | E-1.3 | E-1.1  | E-1.1 | E-1.2 |      |  |      |
| E-1.3 | E-1.4  | E-1.8  | E-1.5  | E-1.3 | E-1.3 | E-1.1  | E-1.1 | E-1.2 |      |  |      |
| E-1.3 | E-1.15 | E-1.10 | E-1.5  | E-1.3 | E-1.3 | E-1.1  | E-1.1 | E-1.2 |      |  |      |
| E-1.3 | E-1.3  | E-1.10 | E-1.8  | E-1.3 | E-1.3 | E-1.7  | E-1.1 | E-1.2 |      |  |      |
| E-1.3 | E-1.3  | E-1.10 | E-1.11 | E-1.3 | E-1.3 | E-1.3  | E-1.5 | E-1.2 |      |  |      |
| E-1.3 | E-1.3  | E-1.10 | E-1.12 | E-1.3 | E-1.3 | E-1.18 | E-1.5 | E-1.2 |      |  |      |
| E-1.3 | E-1.8  | E-1.10 | E-1.12 | E-1.3 | E-1.3 | E-1.19 | E-1.5 | E-1.6 |      |  |      |
| E-1.3 | E-1.10 | E-1.10 | E-1.16 | E-1.3 | E-1.3 | E-1.19 | E-1.6 | E-1.7 |      |  |      |
| E-1.3 | E-1.10 | E-1.10 | E-1.16 |       |       | E-1.19 | E-1.6 |       |      |  |      |
| E-1.3 | E-1.10 | E-1.10 |        |       |       | J-1.1  |       |       |      |  |      |

|        |        |        |
|--------|--------|--------|
| E-1.3  | E-1.10 | E-1.10 |
| E-1.3  | E-1.11 | E-1.10 |
| E-1.3  | E-2.1  | E-1.10 |
| E-1.3  | E-1.3  | E-1.18 |
| E-1.13 | E-1.3  | E-1.18 |
| E-1.13 | E-1.5  | E-1.18 |
| E-1.13 | E-1.16 | E-1.18 |
| E-1.14 | E-1.3  | E-1.18 |
| E-1.14 |        | E-1.18 |

|        |
|--------|
| E-1.5  |
| E-1.17 |
| E-1.19 |
| E-1.19 |
| E-1.19 |
| E-1.20 |
| E-1.21 |
| J-1.1  |

NS

|         | 2006    |        | 2007   |        | 2008    |        | 2009   |  | 2010 |  | 2011 |
|---------|---------|--------|--------|--------|---------|--------|--------|--|------|--|------|
| 2B-1.3  | 2B-1.5  | 2B-1.6 | 2B-1.4 | 1D-1.1 | 2B-1.1  | 1D-1.2 | 2B-1.2 |  |      |  |      |
| 1D-1.7  | 1D-1.10 | 2B-1.6 | 1D-1.7 | 1D-1.1 | 2B-1.1  | 1D-1.4 | 2B-1.2 |  |      |  |      |
| 1D-1.7  | 1D-1.12 | 2B-1.6 | 1D-1.7 | 1D-1.1 | 2B-1.2  | 1D-1.4 | 2B-1.2 |  |      |  |      |
| 1D-1.7  | 2B-1.6  | 2B-1.6 | 1D-1.6 | 1D-1.1 | 1D-1.5  | 1D-1.5 | 2B-1.2 |  |      |  |      |
| 1D-1.7  | 2B-1.6  | 2B-1.6 | 1D-1.7 | 1D-1.1 | 1D-1.13 | 1D-1.5 | 2B-1.2 |  |      |  |      |
| 1D-1.7  | 2B-1.6  | 2B-1.6 | 1D-1.1 | 1D-1.1 | 1D-1.13 | 1D-1.5 | 2B-1.2 |  |      |  |      |
| 1D-1.7  | 1D-1.7  | 2B-1.6 | 1D-1.1 | 1D-1.1 | 1D-1.13 | 1D-1.5 | 2B-1.3 |  |      |  |      |
| 1D-1.7  | 1D-1.7  | 2B-1.6 | 1D-1.7 | 1D-1.1 | 1D-1.13 | 1D-1.5 | 1D-1.3 |  |      |  |      |
| 1D-1.7  | 1D-1.8  | 2B-1.6 | 1D-1.7 |        | 1D-1.13 | 1D-1.5 |        |  |      |  |      |
| 1D-1.7  | 2B-1.6  | 2B-1.6 |        |        | 1C-1.1  |        |        |  |      |  |      |
| 1D-1.7  | 2B-1.6  | 1D-1.1 |        |        | 2B-1.7  |        |        |  |      |  |      |
| 1D-1.9  | 1D-1.6  | 1D-1.1 |        |        | 2B-1.8  |        |        |  |      |  |      |
| 1D-1.9  | 2B-2.1  | 1D-1.1 |        |        | 1D-1.7  |        |        |  |      |  |      |
| 1D-1.9  | 1D-1.1  | 1D-1.1 |        |        | 1D-1.13 |        |        |  |      |  |      |
| 1D-1.9  | 1D-1.1  | 1D-1.1 |        |        | 1D-1.13 |        |        |  |      |  |      |
| 1D-1.9  | 1D-1.7  | 1D-1.6 |        |        | 1D-1.13 |        |        |  |      |  |      |
| 1D-1.10 | 1D-1.10 | 1D-1.6 |        |        | 1D-1.13 |        |        |  |      |  |      |
| 1D-1.10 | 1D-1.1  | 1D-1.9 |        |        | 1C-1.1  |        |        |  |      |  |      |
| 1D-1.11 |         | 1D-1.9 |        |        |         |        |        |  |      |  |      |
