# Supplementary material for: Genetic Structure of Avian Influenza Viruses from Ducks of the Atlantic Flyway of North America
Source: PubMed Central journal article supplement (PMC3907406; doi:10.1371/journal.pone.0086999), 2014-01-30

**Figure S5. Spatial distribution of detections of the Atlantic flyway duck AIV gene sub-lineages in North American flyways.** The numbers of viruses identified in each flyway are shown for the indicated gene sub-lineages that were identified in the 2006-2011 Atlantic flyway duck viruses. Only sub-lineages with  $\geq 10$  genes detected in at least one flyway are shown. Flyways are shown in different shading: Atlantic flyway (AF), black; Mississippi flyway (MF), dark grey; Central flyway (CF), light grey; Pacific flyway (PF), white.

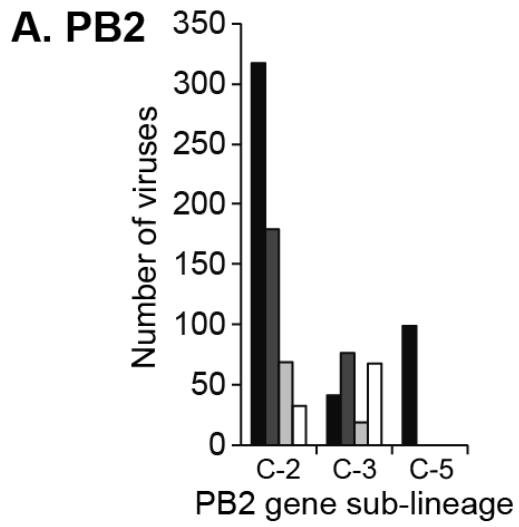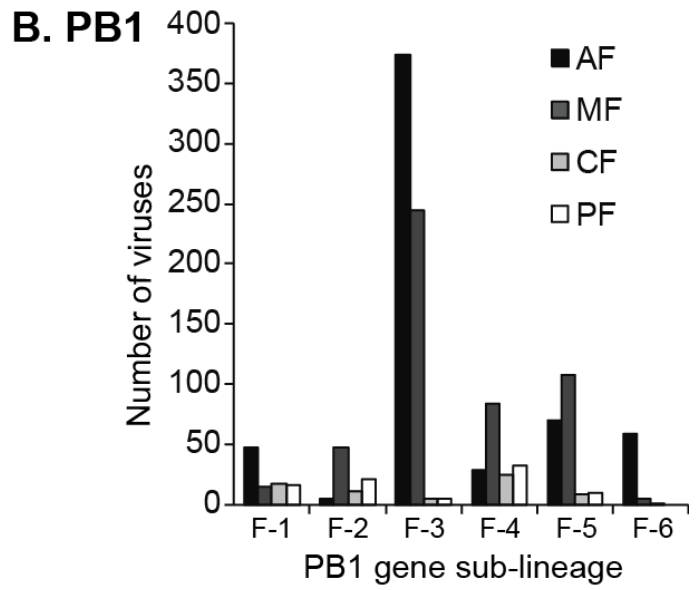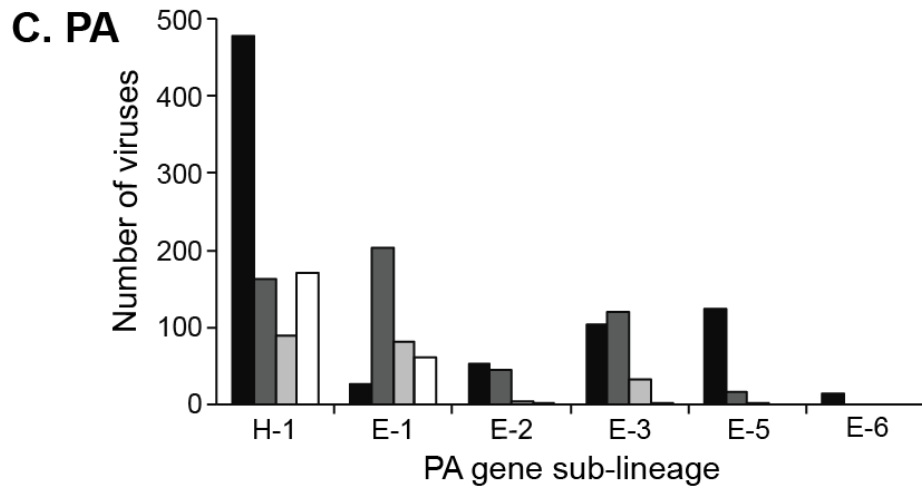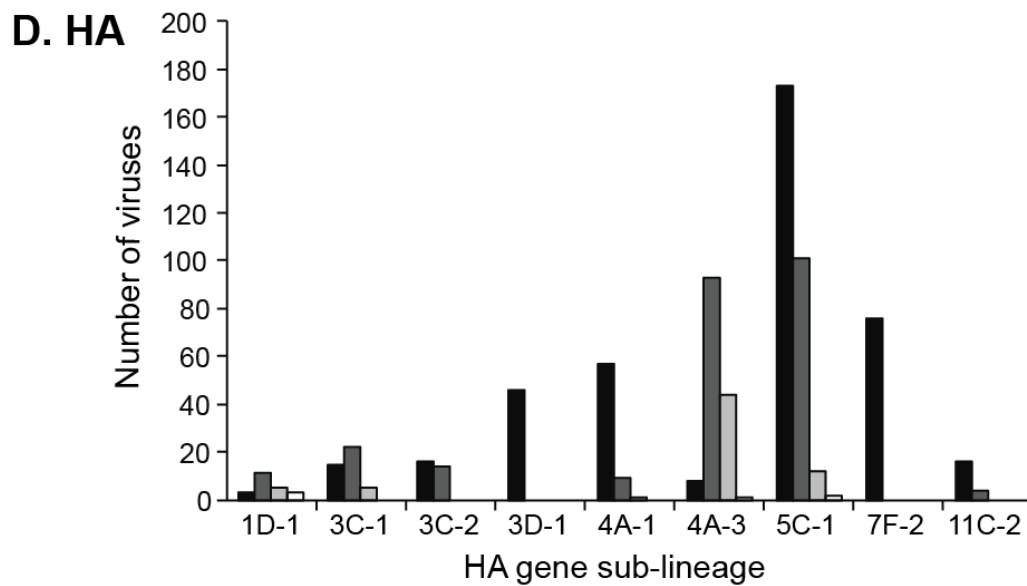

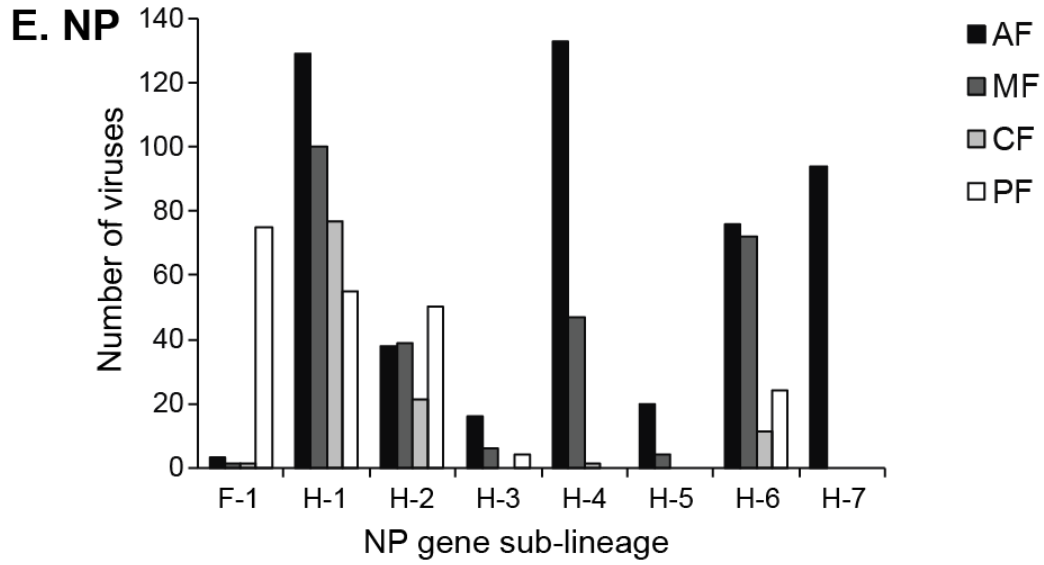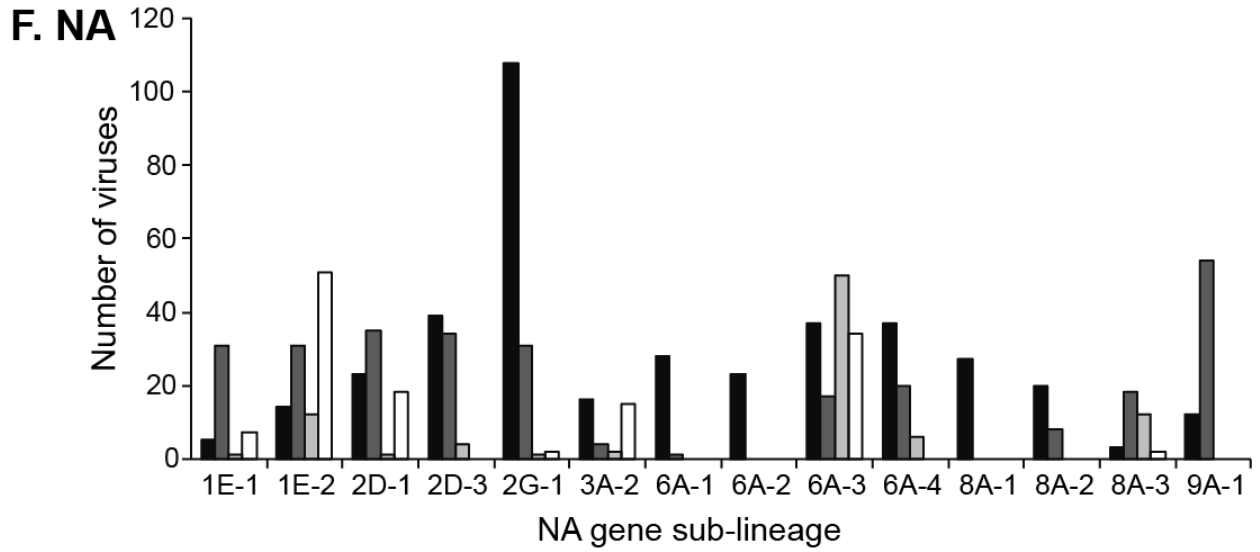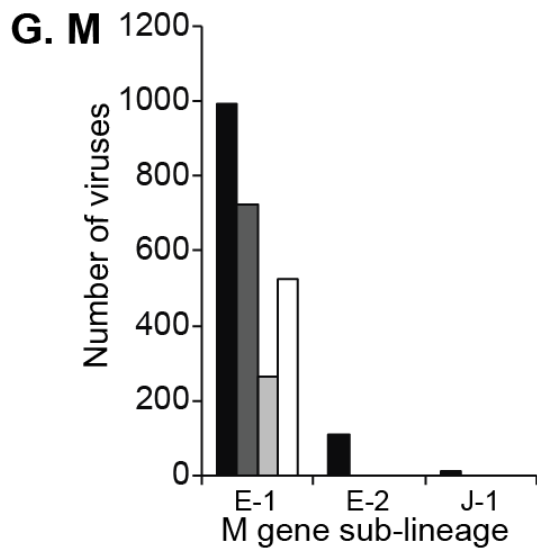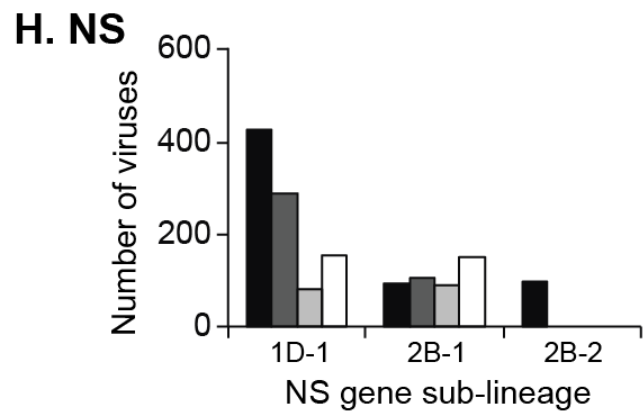

Supplement: pone.0086999.s005.pdf [file pone.0086999.s005.pdf]
