# Supplementary material for: Genetic Structure of Avian Influenza Viruses from Ducks of the Atlantic Flyway of North America
Source: PubMed Central journal article supplement (PMC3907406; doi:10.1371/journal.pone.0086999), 2014-01-30
Supplement: pone.0086999.s006.pdf [file pone.0086999.s006.pdf]

Table S1. The 25 duck AIVs from Newfoundland, Canada, sequenced in this study.

| HA | Virus                                               | Abbreviation       | Date<br>(mm/dd/yy) | Site              |
|----|-----------------------------------------------------|--------------------|--------------------|-------------------|
| H2 | A/Northern pintail/Newfoundland/GR683/2011(H2N2)    | NOPI NL GR683 2011 | 10/13/11           | Commonwealth Pond |
|    | A/Mallard/Newfoundland/GR475/2011(H2N2)             | MALL NL GR475 2011 | 09/14/11           | Quidi Vidi Lake   |
|    | A/American black duck/Newfoundland/836/2008(H2N4)   | ABDU NL 836 2008   | 10/08/08           | Mundy Pond        |
|    | A/American black duck/Newfoundland/840/2008(H2N4)   | ABDU NL 840 2008   | 10/15/08           | Mundy Pond        |
|    | A/American black duck/Newfoundland/812/2008(H2N6)   | ABDU NL 812 2008   | 09/26/08           | Mundy Pond        |
| H3 | A/American black duck/Newfoundland/GR252/2011(H3N2) | ABDU NL GR252 2011 | 08/31/11           | Mundy Pond        |
|    | A/American black duck/Newfoundland/GR490/2011(H3N2) | ABDU NL GR490 2011 | 09/17/11           | Commonwealth Pond |
|    | A/American black duck/Newfoundland/GR256/2011(H3N2) | ABDU NL GR256 2011 | 08/31/11           | Mundy Pond        |
|    | A/American black duck/Newfoundland/GR396/2011(H3N2) | ABDU NL GR396 2011 | 09/12/11           | Commonwealth Pond |
|    | A/American black duck/Newfoundland/MW662/2010(H3N6) | ABDU NL MW662 2010 | 09/17/10           | Commonwealth Pond |
|    | A/American black duck/Newfoundland/732/2008(H3N8)   | ABDU NL 732 2008   | 09/15/08           | Mundy Pond        |
|    | A/American black duck/Newfoundland/734/2008 H3N8)   | ABDU NL 734 2008   | 09/19/08           | Mundy Pond        |
|    | A/Northern pintail /Newfoundland/GR679/2011(H3N2)   | NOPI NL GR679 2011 | 10/12/11           | Commonwealth Pond |
| H4 | A/American black duck/Newfoundland/807/2008(H4N4)   | ABDU NL 807 2008   | 10/01/08           | Mundy Pond        |
|    | A/American black duck/Newfoundland/819/2008(H4N6)   | ABDU NL 819 2008   | 09/26/08           | Mundy Pond        |
|    | A/American black duck/Newfoundland/826/2008(H4N6)   | ABDU NL 826 2008   | 10/08/08           | Mundy Pond        |
|    | A/American black duck/Newfoundland/MW609/2010(H4N6) | ABDU NL MW609 2010 | 09/16/10           | Mundy Pond        |
|    | A/American black duck/Newfoundland/MW861/2010(H4N6) | ABDU NL MW861 2010 | 12/01/10           | Commonwealth Pond |
|    | A/Mallard/Newfoundland/PR021/2010(H4N6)             | MALL NL PR021 2010 | 10/14/10           | Commonwealth Pond |
| H6 | A/American black duck/Newfoundland/MW733/2010(H6N6) | ABDU NL MW733 2010 | 10/14/10           | Commonwealth Pond |
|    | A/American black duck/Newfoundland/PR007/2010(H6N6) | ABDU NL PR007 2010 | 10/15/10           | Commonwealth Pond |

|     |                                                                            |                     |          |                   |
|-----|----------------------------------------------------------------------------|---------------------|----------|-------------------|
|     | A/Mallard and American Black Duck Hybrid<br>/Newfoundland/MW721/2010(H6N8) | M-A Hybrid MW721 NL | 09/30/10 | Quidi Vidi Lake   |
| H11 | A/American black<br>duck/Newfoundland/MW819/2010(H11N3)                    | ABDU NL MW819 2010  | 11/22/10 | Commonwealth Pond |
|     | A/American black<br>duck/Newfoundland/MW774/2010(H11N9)                    | ABDU NL MW774 2010  | 11/08/10 | Commonwealth Pond |
| H12 | A/Northern pintail/Newfoundland/GR495/2011(H12)                            | NOPI NL GR495 2011  | 09/19/11 | Mundy Pond        |

---
