# Supplementary material for: Genetic Structure of Avian Influenza Viruses from Ducks of the Atlantic Flyway of North America
Source: PubMed Central journal article supplement (PMC3907406; doi:10.1371/journal.pone.0086999), 2014-01-30
Supplement: pone.0086999.s007.pdf [file pone.0086999.s007.pdf]

Table S2. Genetic analysis of the 109 Atlantic flyway duck AIVs (from 2006 to 2011).

| HA | Virus identification information                                 | Genotype    | Sub-genotype <sup>b</sup> | Gene type by segment <sup>c</sup> |       |       |        |       |        |        |         |
|----|------------------------------------------------------------------|-------------|---------------------------|-----------------------------------|-------|-------|--------|-------|--------|--------|---------|
|    |                                                                  |             |                           | PB2                               | PB1   | PA    | HA     | NP    | NA     | M      | NS      |
| H1 | A/American black duck/Newfoundland/1146/2009(H1N1) <sup>a</sup>  | CFE1DH1EE2B | CFE1DH1EE2B-1             | C-2.1                             | F-3.1 | E-1.1 | 1D-1.1 | H-4.1 | 1E-1.1 | E-1.1  | 2B-1.1  |
|    | A/American black duck/Newfoundland/1148/2009(H1N1) <sup>a</sup>  |             | CFE1DH1EE2B-1             | C-2.1                             | F-3.1 | E-1.1 | 1D-1.1 | H-4.1 | 1E-1.1 | E-1.1  | 2B-1.1  |
|    | A/American black duck/Newfoundland/1150/2009(H1N1) <sup>a</sup>  |             | CFE1DH1EE2B-1             | C-2.1                             | F-3.1 | E-1.1 | 1D-1.1 | H-4.1 | 1E-1.1 | E-1.1  | 2B-1.1  |
|    | A/domestic duck/Newfoundland/MW668/2010(H1N1) <sup>a</sup>       |             | CFE1DH1EE2B-1             | C-2.1                             | F-3.1 | E-1.1 | 1D-1.1 | H-4.1 | 1E-1.1 | E-1.1  | 2B-1.1  |
| H2 | A/Northern pintail/Newfoundland/GR683/2011(H2N2)                 | CFE2HH2DE2B | CFH2HH2DE2B-1             | C-2.2                             | F-4.1 | E-2.1 | 2H-1.1 | H-2.1 | 2D-1   | E-1.2  | 2B-1.2  |
|    | A/mallard/Newfoundland/GR475/2011(H2N2)                          |             | CFH2HH2DE2B-2             | C-2.2                             | F-4.1 | E-1.2 | 2H-1.1 | H-2.1 | 2D-1   | E-1.2  | 2B-1.2  |
|    | A/mallard/Quebec/10969/2006(H2N3)                                | CFE2HH3AE1D | CFE2HH3AE1D-1             | C-2.11                            | F-4.6 | E-5.1 | 2H-2.1 | H-1.2 | 3A-2.2 | E-1.14 | 1D-1.7  |
|    | A/mallard/Quebec/11063/2006(H2N3)                                |             | CFE2HH3AE1D-2             | C-3.2                             | F-1.3 | E-5.1 | 2H-2.1 | H-3.3 | 3A-2.2 | E-1.13 | 1D-1.10 |
|    | A/mallard/Quebec/11281/2006(H2N3)                                |             | CFE2HH3AE1D-2             | C-3.2                             | F-1.3 | E-5.1 | 2H-2.1 | H-3.3 | 3A-2.2 | E-1.13 | 1D-1.10 |
|    | A/American black duck/Newfoundland/836/2008(H2N4)                | CFE2HH4AE1D | CFE2HH4AE1D-1             | C-2.2                             | F-4.2 | E-2.1 | 2H-1.2 | H-3.1 | 4A-1.1 | E-1.3  | 1D-1.1  |
|    | A/American black duck/Newfoundland/840/2008(H2N4)                |             | CFE2HH4AE1D-1             | C-2.2                             | F-4.2 | E-2.1 | 2H-1.2 | H-3.1 | 4A-1.1 | E-1.3  | 1D-1.1  |
|    | A/American black duck/Newfoundland/812/2008(H2N6)                | CFH2HH6AE1D | CFH2HH6AE1D-1             | C-1.1                             | F-3.2 | H-1.1 | 2H-1.3 | H-3.1 | 6A-1.1 | E-1.3  | 1D-1.1  |
| H3 | A/American black duck/Newfoundland/GR252/2011(H3N2)              | CFE3CH2DE2B | CFE3CH2DE2B-1             | C-2.2                             | F-2.1 | E-2.1 | 3C-1.1 | H-2.1 | 2D-1   | E-1.4  | 2B-1.2  |
|    | A/American black duck/Newfoundland/GR256/2011(H3N2)              |             | CFE3CH2DE2B-2             | C-2.2                             | F-2.1 | E-2.1 | 3C-1.1 | H-5.1 | 2D-1.2 | E-1.4  | 2B-1.2  |
|    | A/American black duck/Newfoundland/GR490/2011(H3N2)              |             | CFE3CH2DE2B-?             | C-2.2                             | F-2.1 | E-2.1 | 3C-1.1 | H-2.1 | 2D     | E-1.4  | 2B-1.2  |
|    | A/American black duck/Newfoundland/GR396/2011(H3N2)              | CFH3CH2DE2B | CFH3CH2DE2B-1             | C-2.2                             | F-1.1 | H-1.2 | 3C-1.1 | H-2.1 | 2D-1.1 | E-1.4  | 2B-1.2  |
|    | A/American black duck/Newfoundland/GR679/2011(H3N2)              |             | CFH3CH2DE2B-2             | C-2.5                             | F-4.1 | H-1.5 | 3C-1.1 | H-5.1 | 2D     | E-1.6  | 2B-1.2  |
|    | A/American black duck/Newfoundland and Labrador/26516/2007(H3N2) | CFH3DH2DE1D | CFH3DH2DE1D-1             | C-2.10                            | F-3.2 | H-1.6 | 3D-1.1 | H-2.3 | 2D-1.1 | E-1.12 | 1D-1.1  |
|    | A/American black duck/Newfoundland and Labrador/26553/2007(H3N2) |             | CFH3DH2DE1D-2             | C-2.10                            | F-3.2 | H-1.6 | 3D-1.1 | H-3.2 | 2D-1.1 | E-1.12 | 1D-1.1  |
|    | A/American black duck/Quebec/11235/2006(H3N2)                    | CFH3CH2DE1D | CFH3CH2DE1D-1             | C-3.2                             | F-3.4 | H-1.7 | 3C-2.1 | H-6.2 | 2D-2.1 | E-1.3  | 1D-1.7  |
|    | A/mallard/Quebec/11040/2006(H3N2)                                |             | CFH3CH2DE1D-2             | C-2.12                            | F-3.4 | H-1.7 | 3C-2.1 | H-6.2 | 2D-2.1 | E-1.3  | 1D-1.7  |
|    | A/mallard/Quebec/11045/2006(H3N2)                                |             | CFH3CH2DE1D-2             | C-2.12                            | F-3.4 | H-1.7 | 3C-2.1 | H-6.2 | 2D-2.1 | E-1.3  | 1D-1.7  |

|                                                          |             |               |        |        |        |        |       |        |        |         |
|----------------------------------------------------------|-------------|---------------|--------|--------|--------|--------|-------|--------|--------|---------|
| A/mallard/Quebec/11121/2006(H3N2)                        |             | CFH3CH2DE1D-2 | C-2.12 | F-3.4  | H-1.7  | 3C-2.1 | H-6.2 | 2D-2.1 | E-1.3  | 1D-1.7  |
| A/mallard/Quebec/11020/2006(H3N2)                        |             | CFH3CH2DE1D-2 | C-2.12 | F-3.4  | H-1.7  | 3C-2.1 | H-6.2 | 2D-2.1 | E-1.3  | 1D-1.7  |
| A/mallard/Quebec/11247/2006(H3N2)                        |             | CFH3CH2DE1D-3 | C-3.3  | F-4.6  | H-1.7  | 3C-2.1 | H-6.2 | 2D-2.1 | E-1.3  | 1D-1.7  |
| A/mallard/Quebec/11194/2006(H3N2)                        |             | CFH3CH2DE1D-3 | C-3.3  | F-4.6  | H-1.7  | 3C-2.1 | H-6.2 | 2D-2.1 | E-1.3  | 1D-1.7  |
| A/mallard/Quebec/11093/2006(H3N2)                        |             | CFH3CH2DE1D-3 | C-3.4  | F-4.6  | H-1.7  | 3C-2.1 | H-6.2 | 2D-2.1 | E-1.3  | 1D-1.7  |
| A/mallard/Quebec/11221/2006(H3N2)                        |             | CFH3CH2DE1D-4 | C-2.7  | F-2.2  | H-1.7  | 3C-2.1 | H-6.2 | 2D-2.1 | E-1.3  | 1D-1.7  |
| A/American black duck/Newfoundland/MW662/2010(H3N6)      | CFE3CH6AE1D | CFE3CH6AE1D-1 | C-2.4  | F-4.3  | E-1.1  | 3D-1.1 | H-1.1 | 6A-3.1 | E-1.1  | 1D-1.5  |
| A/American black duck/New Brunswick/25182/2007(H3N6)     | CFE3CH6AE2B | CFE3CH6AE2B-1 | C-2.7  | F-6.1  | E-1.3  | 3C-2.3 | H-2.4 | 6A-4.2 | E-1.5  | 2B-1.4  |
| A/mallard/Maryland/1235/2006(H3N6)                       | CFH3CH6AE1D | CFH3CH6AE1D-1 | C-2.7  | F-5.1  | H-1.10 | 3C-2.2 | H-3.4 | 6A-4.3 | E-1.15 | 1D-1.12 |
| A/blue-winged teal/New Brunswick/03757/2009(H3N6)        |             | CFH3CH6AE1D-2 | C-2.2  | F-3.12 | H-1.15 | 3C-2.3 | H-1.1 | 6A-3.2 | E-1.20 | 1D-1.7  |
| A/American black duck/Newfoundland/732/2008(H3N8)        | CFE3DH8AE1D | CFE3DH8AE1D-1 | C-1.1  | F-3.2  | E-2.1  | 3D-1.1 | H-3.1 | 8A     | E-1.3  | 1D-1.1  |
| A/mallard/Nova Scotia/03271/2009(H3N8)                   |             | CFE3DH8AE1D-2 | C-3.5  | F-4.5  | E-2.1  | 3D-1.2 | H-4.6 | 8A-2.1 | E-1.19 | 1D-1.13 |
| A/ring-necked duck/Nova Scotia/03378/2009(H3N8)          |             | CFE3DH8AE1D-2 | C-3.5  | F-4.5  | E-2.1  | 3D-1.2 | H-4.6 | 8A-2.1 | E-1.19 | 1D-1.13 |
| A/ring-necked duck/New Brunswick/03400/2009(H3N8)        |             | CFE3DH8AE1D-2 | C-3.5  | F-4.5  | E-2.1  | 3D-1.2 | H-4.6 | 8A-2.1 | E-1.19 | 1D-1.13 |
| A/green-winged teal/New Brunswick/03483/2009(H3N8)       |             | CFE3DH8AE1D-2 | C-3.5  | F-4.5  | E-2.1  | 3D-1.2 | H-4.6 | 8A-2.1 | E-1.19 | 1D-1.13 |
| A/northern pintail/New Brunswick/03547/2009(H3N8)        |             | CFE3DH8AE1D-2 | C-3.5  | F-4.5  | E-2.1  | 3D-1.2 | H-4.6 | 8A-2.1 | E-1.19 | 1D-1.13 |
| A/blue-winged teal/Prince Edward Island/03912/2009(H3N8) |             | CFE3DH8AE1D-2 | C-3.5  | F-4.5  | E-2.1  | 3D-1.2 | H-4.6 | 8A-2.1 | E-1.19 | 1D-1.13 |
| A/green-winged teal/New Brunswick/02586/2007(H3N8)       | CFH3DH8AE1D | CFH3DH8AE1D-1 | C-2.19 | F-3.6  | H-1.17 | 3D-2.1 | H-4.7 | 8A-2.2 | E-1.18 | 1D-1.9  |
| A/green-winged teal/New Brunswick/02587/2007(H3N8)       |             | CFH3DH8AE1D-1 | C-2.19 | F-3.6  | H-1.17 | 3D-2.1 | H-4.7 | 8A-2.2 | E-1.18 | 1D-1.1  |
| A/green-winged teal/New Brunswick/02588/2007(H3N8)       |             | CFH3DH8AE1D-1 | C-2.19 | F-3.6  | H-1.17 | 3D-2.1 | H-4.7 | 8A-2.2 | E-1.18 | 1D-1.1  |
| A/green-winged teal/New Brunswick/02590/2007(H3N8)       |             | CFH3DH8AE1D-1 | C-2.19 | F-3.6  | H-1.17 | 3D-2.1 | H-4.7 | 8A-2.2 | E-1.18 | 1D-1.1  |
| A/green-winged teal/New Brunswick/02591/2007(H3N8)       |             | CFH3DH8AE1D-1 | C-2.19 | F-3.6  | H-1.17 | 3D-2.1 | H-4.7 | 8A-2.2 | E-1.18 | 1D-1.1  |
| A/green-winged teal/New Brunswick/02592/2007(H3N8)       |             | CFH3DH8AE1D-1 | C-2.19 | F-3.6  | H-1.17 | 3D-2.1 | H-4.7 | 8A-2.2 | E-1.18 | 1D-1.1  |
| A/American black duck/Newfoundland/734/2008(H3N8)        |             | CFH3DH8AE1D-2 | C-1.1  | F-3.2  | H-1.1  | 3D-1.1 | H-3.1 | 8A-2.1 | E-1.3  | 1D-1.1  |

|    |                                                             |             |               |        |        |        |        |       |        |        |         |
|----|-------------------------------------------------------------|-------------|---------------|--------|--------|--------|--------|-------|--------|--------|---------|
|    | A/blue-winged teal/Nova Scotia/03971/2009(H3N8)             |             | CFH3DH8AE1D-3 | C-2.2  | F-3.11 | H-1.17 | 3D-1.3 | H-4.5 | 8A-2.2 | E-1.21 | 1D-1.13 |
|    | A/blue-winged teal/Prince Edward Island/03927/2009(H3N8)    |             | CFH3DH8AE1D-4 | C-2.18 | F-3.6  | H-1.17 | 3D-2.1 | H-1.6 | 8A-2.2 | E-1.18 | 1D-1.13 |
|    | A/mallard/Quebec/11082/2006(H3N8)                           | CFE3CH8AE2B | CFE3CH8AE2B-1 | C-2.7  | F-3.7  | E-3.1  | 3C-1.2 | H-2.3 | 8A-1.4 | E-1.14 | 2B-1.3  |
|    | A/American black duck/New Brunswick/19350/2006(H3N8)        |             | CFE3CH8AE2B-2 | C-2.6  | F-3.5  | E-4.1  | 3C-1.2 | H-1.8 | 8A-1.1 | E-1.10 | 2B-1.6  |
|    | A/American wigeon/New Brunswick/04487/2007(H3N8)            |             | CFE3CH8AE2B-2 | C-2.6  | F-3.5  | E-4.1  | 3C-1.2 | H-1.8 | 8A-1.1 | E-1.10 | 2B-1.6  |
|    | A/American wigeon/New Brunswick/04488/2007(H3N8)            |             | CFE3CH8AE2B-2 | C-2.6  | F-3.5  | E-4.1  | 3C-1.2 | H-1.8 | 8A-1.1 | E-1.10 | 2B-1.6  |
|    | A/American wigeon/New Brunswick/04489/2007(H3N8)            |             | CFE3CH8AE2B-2 | C-2.6  | F-3.5  | E-4.1  | 3C-1.2 | H-1.8 | 8A-1.1 | E-1.10 | 2B-1.6  |
|    | A/American wigeon/New Brunswick/04490/2007(H3N8)            |             | CFE3CH8AE2B-2 | C-2.6  | F-3.5  | E-4.1  | 3C-1.2 | H-1.8 | 8A-1.1 | E-1.10 | 2B-1.6  |
|    | A/American wigeon/New Brunswick/04491/2007(H3N8)            |             | CFE3CH8AE2B-2 | C-2.6  | F-3.5  | E-4.1  | 3C-1.2 | H-1.8 | 8A-1.1 | E-1.10 | 2B-1.6  |
|    | A/American wigeon/New Brunswick/04492/2007(H3N8)            |             | CFE3CH8AE2B-2 | C-2.6  | F-3.5  | E-4.1  | 3C-1.2 | H-1.8 | 8A-1.1 | E-1.10 | 2B-1.6  |
|    | A/American wigeon/New Brunswick/04493/2007(H3N8)            |             | CFE3CH8AE2B-2 | C-2.6  | F-3.5  | E-4.1  | 3C-1.2 | H-1.8 | 8A-1.1 | E-1.10 | 2B-1.6  |
|    | A/American wigeon/New Brunswick/04494/2007(H3N8)            |             | CFE3CH8AE2B-2 | C-2.6  | F-3.5  | E-4.1  | 3C-1.2 | H-1.8 | 8A-1.1 | E-1.10 | 2B-1.6  |
|    | A/American wigeon/New Brunswick/04497/2007(H3N8)            |             | CFE3CH8AE2B-2 | C-2.6  | F-3.5  | E-4.1  | 3C-1.2 | H-1.8 | 8A-1.1 | E-1.10 | 2B-1.6  |
|    | A/American wigeon/New Brunswick/04500/2007(H3N8)            |             | CFE3CH8AE2B-2 | C-2.6  | F-3.5  | E-4.1  | 3C-1.2 | H-1.8 | 8A-1.1 | E-1.10 | 2B-1.6  |
|    | A/American black duck/Prince Edward Island/14228/2006(H3N8) | CFH3CH8AE2B | CFH3CH8AE2B-1 | C-4.1  | F-3.6  | H-1.1  | 3C-1.2 | H-1.2 | 8A-1.2 | E-1.10 | 2B-1.6  |
|    | A/American black duck/Prince Edward Island/14230/2006(H3N8) |             | CFH3CH8AE2B-2 | C-2.9  | F-3.6  | H-1.1  | 3C-1.2 | H-1.2 | 8A-1.2 | E-1.10 | 2B-1.6  |
|    | A/mallard/Maryland/807/2007(H3N8)                           | CFH3CH8AE1D | CFH3CH8AE1D-1 | C-2.7  | F-5.2  | H-1.12 | 3C-1.3 | H-1.7 | 8A-3.1 | E-1.9  | 1D-1.7  |
| H4 | A/blue-winged teal/New Brunswick/03756/2009(H4N2)           | CFH4AH2DE2B | CFH4AH2DE2B-1 | C-2.8  | F-2.1  | H-1.16 | 4A-3.1 | H-1.1 | 2D-1.1 | E-1.5  | 2B-1.7  |
|    | A/American black duck/Newfoundland/807/2008(H4N4)           | CFH4AH4AE1D | CFH4AH4AE1D-1 | C-1.1  | F-3.2  | H-1.1  | 4A-1.1 | H-1.2 | 4A-1.1 | E-1.3  | 1D-1.1  |
|    | A/American black duck/Newfoundland/819/2008(H4N6)           | CFH4AH6AE1D | CFH4AH6AE1D-1 | C-1.1  | F-3.2  | H-1.1  | 4A-1.1 | H-1.2 | 6A-1.1 | E-1.3  | 1D-1.1  |
|    | A/American black duck/Newfoundland/826/2008(H4N6)           |             | CFH4AH6AE1D-1 | C-1.1  | F-3.2  | H-1.1  | 4A-1.1 | H-1.2 | 6A-1.1 | E-1.3  | 1D-1.1  |

|    |                                                                 |             |               |        |       |        |        |              |         |        |         |
|----|-----------------------------------------------------------------|-------------|---------------|--------|-------|--------|--------|--------------|---------|--------|---------|
|    | A/American black duck/Newfoundland/MW861/2010(H4N6)             |             | CFH4AH6AE1D-2 | C-2.3  | F-1.1 | H-1.5  | 4A-2.1 | H-1.1        | 6A-2.1  | E-1.5  | 1D-1.5  |
|    | A/mallard/Newfoundland/PR021/2010(H4N6)                         |             | CFH4AH6AE1D-2 | C-2.4  | F-1.1 | H-1.5  | 4A-2.1 | H-1.1        | 6A-2.1  | E-1.6  | 1D-1.5  |
|    | A/American black duck/Prince Edward Island/14235/2006(H4N6)     |             | CFH4AH6AE1D-3 | C-4.1  | F-3.2 | H-1.1  | 4A-1.5 | H-4.3        | 6A-1.2  | E-1.11 | 1D-1.6  |
|    | A/American black duck/Prince Edward Island/02708/2007(H4N6)     |             | CFH4AH6AE1D-3 | C-4.1  | F-3.6 | H-1.1  | 4A-1.5 | H-4.3        | 6A-1.3  | E-1.11 | 1D-1.6  |
|    | A/mallard/Quebec/11182/2006(H4N6)                               |             | CFH4AH6AE1D-4 | C-2.12 | F-3.2 | H-1.9  | 4A-1.4 | H-1.5        | 6A-3.4  | E-1.3  | 1D-1.9  |
|    | A/mallard/Quebec/11189/2006(H4N6)                               |             | CFH4AH6AE1D-4 | C-2.12 | F-3.4 | H-1.7  | 4A-1.4 | H-1.5        | 6A-4.2  | E-1.3  | 1D-1.9  |
|    | A/American black duck/Newfoundland/MW609/2010(H4N6)             | CFE4AH6AE1D | CFE4AH6AE1D-1 | C-2.1  | F-3.1 | E-1.1  | 4A-1.2 | H-2.1        | 6A-2.1  | E-1.1  | 1D-1.2  |
|    | A/American black duck/New Brunswick/19347/2006(H4N6)            |             | CFE4AH6AE1D-2 | C-2.10 | F-3.3 | E-3.1  | 4A-1.4 | H-2.3        | 6A-1.1  | E-1.8  | 1D-1.8  |
|    | A/American black duck/New Brunswick/19497/2006(H4N6)            |             | CFE4AH6AE1D-3 | C-2.7  | F-5.1 | E-3.2  | 4A-1.6 | H-6.1        | 6A-4.1  | E-1.3  | 1D-1.7  |
|    | A/American black duck/New Brunswick/19502/2006(H4N6)            |             | CFE4AH6AE1D-3 | C-2.7  | F-5.1 | E-3.2  | 4A-1.6 | H-6.2        | 6A-4.1  | E-1.3  | 1D-1.7  |
|    | A/mallard/Quebec/11106/2006(H4N6)                               |             | CFE4AH6AE1D-4 | C-2.12 | F-3.4 | E-5.2  | 4A-1.4 | H-1.5        | 6A-4.2  | E-1.3  | 1D-1.9  |
|    | A/mallard/Quebec/11103/2006(H4N6)                               |             | CFE4AH6AE1D-4 | C-2.12 | F-3.4 | E-5.2  | 4A-1.4 | H-1.5        | 6A-4.2  | E-1.3  | 1D-1.9  |
|    | A/mallard/Quebec/11102/2006(H4N6)                               |             | CFE4AH6AE1D-4 | C-2.12 | F-3.4 | E-5.2  | 4A-1.4 | H-1.5        | 6A-4.2  | E-1.13 | 1D-1.9  |
|    | A/American black duck/Prince Edward Island/02662/2007(H4N6)     |             | CFE4AH6AE1D-5 | C-4.1  | F-3.6 | E-3.1  | 4A-1.5 | H-1.5        | 6A-1.3  | E-1.8  | 1D-1.6  |
|    | A/green-winged teal/New Brunswick/02426/2007(H4N6)              |             | CFE4AH6AE1D-5 | C-4.1  | F-3.6 | E-3.1  | 4A-1.5 | H-1.5        | 6A-1.3  | E-1.8  | 1D-1.6  |
|    | A/mallard/Maryland/965/2006(H4N6)                               | CFE4AH6AE2B | CFE4AH6AE2B-1 | C-2.13 | F-6.2 | E-2.2  | 4A-1.3 | H-2.4        | 6A-3.3  | E-1.4  | 2B-1.5  |
|    | A/American black duck/New Brunswick/19389/2006(H4N8)            | CFE4AH8AE2B | CFE4AH8AE2B-1 | C-2.6  | F-3.5 | E-4.1  | 4A-1.6 | H-6.1        | 8A-1.1  | E-1.3  | 2B-1.6  |
|    | A/American black duck/New Brunswick/19392/2006(H4N8)            |             | CFE4AH8AE2B-2 | C-2.6  | F-5.1 | E-4.1  | 4A-1.6 | H-6.1        | 8A-1.1  | E-1.10 | 2B-1.6  |
|    | A/blue-winged teal/Prince Edward Island/03910/2009(H4N9)        | CFE4AH9AE1D | CFE4AH9AE1D-1 | C-2.18 | F-1.2 | E-2.1  | 4A-3.2 | H-1.6        | 9A-1.2  | E-1.3  | 1D-1.13 |
| H5 | A/American black duck/Newfoundland/1181/2009(H5N4) <sup>a</sup> | CFH5CH4AE1D | CFH5CH4AE1D-1 | C-2.4  | F-3.1 | H-1.3  | 5C-1.1 | H-4.2        | 4A      | E-1.7  | 1D-1.5  |
|    | A/mallard/Maryland/802/2007(H5N1)                               | CFH5CF1EE1D | CFH5CF1EE1D-1 | C-2.7  | F-7.1 | H-1.13 | 5C-1.2 | <b>F-1.1</b> | 1E- 2.1 | E-1.5  | 1D-1.7  |
|    | A/mallard/Ontario/26078/2007(H5N1)                              | CFH5CH1EE1D | CFH5CH1EE1D-1 | C-3.2  | F-4.7 | H-1.14 | 5C-1.4 | H-1.6        | 1E- 2.2 | E-1.16 | 1D-1.7  |
|    | A/mallard/Maryland/182/2006(H5N2)                               | CFH5CH2DE1D | CFH5CH2DE1D-1 | C-2.14 | F-3.7 | H-1.11 | 5C-1.2 | H-5.2        | 2D-1.1  | E-1.3  | 1D-1.10 |
|    | A/Muscovy duck/New York/62095-1/2006(H5N2)                      | CFE5CH2DE1D | CFE5CH2DE1D-1 | C-2.12 | F-1.4 | E-1.5  | 5C-1.3 | H-4.4        | 2D-1.3  | E-1.3  | 1D-1.1  |
|    | A/duck/New York/445743/2006(H5N2)                               |             | CFE5CH2DE1D-1 | C-2.12 | F-1.4 | E-1.5  | 5C-1.3 | H-4.4        | 2D-1.3  | E-1.3  | 1D-1.1  |
|    | A/duck/New York/465571/2006(H5N2)                               | CFE5CH2GE1D | CFE5CH2GE1D-1 | C-2.15 | F-5.1 | E-5.1  | 5C-1.2 | H-4.3        | 2D-3.1  | E-1.5  | 1D-1.7  |

|               |                                                      |              |                |           |           |           |           |           |           |           |           |
|---------------|------------------------------------------------------|--------------|----------------|-----------|-----------|-----------|-----------|-----------|-----------|-----------|-----------|
|               | A/northern pintail/Florida/480645-5/2007(H5N2)       |              | CFE5CH2GE1D-2  | C-3.3     | F-3.8     | E-3.4     | 5C-1.2    | H-6.1     | 2G-2.1    | E-1.16    | 1D-1.7    |
|               | A/duck/Pennsylvania/446080-6/2006(H5N2)              | CFE5CH2DE1D  | CFE5CH2DE1D-1  | C-2.16    | F-1.4     | E-1.5     | 5C-1.3    | H-4.4     | 2D-1.3    | E-1.3     | 1D-1.1    |
|               | A/green winged teal/Delaware/458672-5/2006(H5N2)     |              | CFE5CH2DE1D-2  | C-2.17    | F-3.9     | E-3.5     | 5C-1.5    | H-2.5     | 2D-1.3    | E-1.16    | 1D-1.10   |
| H6            | A/mallard/Maryland/792/2007(H5N9)                    | CFH5CH9AE1D  | CFH5CH9AE1D    | C-2.7     | F-5.2     | H-1.13    | 5C-1.2    | H-1.7     | 9A-3.1    | E-1.5     | 1D-1.7    |
|               | A/American black duck/Newfoundland/MW733/2010(H6N6)  | CFH6BH6AE1D  | CFH6BH6AE1D-1  | C-2.3     | F-3.1     | H-1.4     | 6B-1.1    | H-1.3     | 6A-3.2    | E-1.1     | 1D-1.4    |
|               | A/American black duck/Newfoundland/PR007/2010(H6N6)  |              | CFH6BH6AE1D-2  | C-2.1     | F-3.1     | H-1.5     | 6B-1.1    | H-1.1     | 6A-2.1    | E-1.6     | 1D-1.5    |
| H7            | A/duck/Newfoundland/MW721/2010(H6N8)                 | CFH6BH8AE1D  | CFH6BH8AE1D-1  | C-2.1     | F-3.1     | H-1.4     | 6B-1.1    | H-1.3     | 8A-1.3    | E-1.1     | 1D-1.4    |
|               | A/American black duck/NB/2538/2007(H7N3)             | CFE7FH3AE1D  | CFE7FH3AE1D-1  | C-2.6     | F-4.5     | E-1.4     | 7F-1.1    | H-1.5     | 3A-2.1    | E-1.10    | 1D-1.9    |
|               | A/Muscovy duck/New York/19495-7/2006(H7N2)           | CFH7FH2GE2B  | CFH7FH2GE2B-1  | C-5.1     | F-3.10    | H-1.8     | 7F-2.1    | H-7.1     | 2G-1.1    | E-2.1     | 2B-2.1    |
| H11           | A/American black duck/Newfoundland/MW819/2010(H11N3) | CFH11CH3AE1D | CFH11CH3AE1D-1 | C-2.5     | F-1.2     | H-1.4     | 11C-1.1   | H-2.2     | 3A-1.1    | E-1.5     | 1D-1.5    |
|               | A/American black duck/Newfoundland/MW774/2010(H11N9) | CFH11CH9AE1D | CFH11CH9AE1D-1 | C-2.3     | F-1.2     | H-1.4     | 11C-1.1   | H-2.2     | 9A-1.1    | E-1.5     | 1D-1.5    |
|               | A/mallard/Quebec/11111/2006(H11N9)                   | CFE11CH9AE1D | CFE11CH9AE1D-1 | C-2.6     | F-3.7     | E-3.3     | 11C-2.1   | H-4.5     | 9A-2.1    | E-1.3     | 1D-1.11   |
|               | A/ring-necked duck/New Brunswick/03449/2009(H11N9)   | CFH11CH9AE2B | CFH11CH9AE2B-1 | C-3.5     | F-3.12    | H-1.15    | 11C-1.2   | H-1.9     | 9A-1.3    | E-1.17    | 2B-1.8    |
| H12           | A/Northern pintail/Newfoundland/GR495/2011(H12)      | CFE12AH?E1D  | CFE12AH?E1D-1  | C-3.1     | F-4.4     | E-2.1     | 12A-1.1   | H-1.4     | -         | E-1.7     | 1D-1.3    |
| H13           | A/hooded merganser/New Brunswick/03750/2009(H13N6)   | JFE13AD6AF1C | JFE13AD6AF1C-1 | J-1.1     | F-8.1     | E-6.1     | 13A-1.1   | D-1.1     | 6A-1.2    | F-1.1     | 1C-1.1    |
| H16           | A/mallard/Quebec/02916-1/2009(H16N3)                 | JFE16DD3DF1C | JFE16DD3DF1C-1 | J-1.2     | F-8.1     | E-6.2     | 16D-1.1   | D-1.1     | 3D-1.1    | F-1.1     | 1C-1.1    |
| <b>Totals</b> | <b>109</b>                                           | <b>43</b>    | <b>70</b>      |           |           |           |           |           |           |           |           |
|               | <b>Gene lineages</b>                                 |              |                | <b>2</b>  | <b>1</b>  | <b>2</b>  | <b>12</b> | <b>3</b>  | <b>9</b>  | <b>2</b>  | <b>3</b>  |
|               | <b>Gene sub-lineages</b>                             |              |                | <b>6</b>  | <b>8</b>  | <b>7</b>  | <b>19</b> | <b>9</b>  | <b>20</b> | <b>3</b>  | <b>4</b>  |
|               | <b>Gene types</b>                                    |              |                | <b>29</b> | <b>31</b> | <b>34</b> | <b>38</b> | <b>32</b> | <b>38</b> | <b>23</b> | <b>23</b> |

<sup>a</sup> The 4 H1N1 viruses and the H5N4 virus from Newfoundland were sequenced previously (accession numbers KC464555-KC464586, KC492275-KC492290 and KC492307-KC492330).

<sup>b</sup> Repeatedly detected homologous genomes are shaded in grey.

<sup>c</sup> AIV genes of origin other than North American avian are highlighted in colour: Eurasian avian, blue; Eurasian gull, yellow; North American gull, green.
