# Supplementary material for: Genetic Structure of Avian Influenza Viruses from Ducks of the Atlantic Flyway of North America
Source: PubMed Central journal article supplement (PMC3907406; doi:10.1371/journal.pone.0086999), 2014-01-30
Supplement: pone.0086999.s008.pdf [file pone.0086999.s008.pdf]

Table S3. AIV gene typing summary for Atlantic flyway locations with 20 or more viruses.

| Location      | Category <sup>a</sup> | HA | NA | PB2 | PB1 | PA | NP | M | NS | Total |
|---------------|-----------------------|----|----|-----|-----|----|----|---|----|-------|
| Newfoundland  | Gene lineages         | 9  | 7  | 1   | 1   | 2  | 1  | 1 | 2  | 24    |
|               | Sub-lineages          | 10 | 10 | 3   | 4   | 3  | 5  | 1 | 2  | 38    |
|               | Gene types            | 13 | 12 | 8   | 9   | 9  | 12 | 8 | 7  | 78    |
| Quebec        | Gene lineages         | 4  | 5  | 1   | 1   | 2  | 1  | 1 | 2  | 17    |
|               | Sub-lineages          | 6  | 7  | 3   | 5   | 4  | 6  | 2 | 3  | 36    |
|               | Gene types            | 6  | 7  | 8   | 7   | 7  | 6  | 4 | 6  | 51    |
| New Brunswick | Gene lineages         | 3  | 5  | 2   | 1   | 2  | 2  | 2 | 3  | 19    |
|               | Sub-lineages          | 6  | 8  | 4   | 6   | 6  | 5  | 2 | 3  | 40    |
|               | Gene types            | 8  | 12 | 9   | 9   | 9  | 11 | 9 | 10 | 81    |

<sup>a</sup> Gene lineages, sub-lineages and gene types are defined as sharing  $\geq 90\%$ ,  $\geq 95\%$  and  $\geq 99\%$  nucleotide identity, respectively.
