# Supplementary material for: Genetic Structure of Avian Influenza Viruses from Ducks of the Atlantic Flyway of North America
Source: PubMed Central journal article supplement (PMC3907406; doi:10.1371/journal.pone.0086999), 2014-01-30
Supplement: pone.0086999.s009.pdf [file pone.0086999.s009.pdf]

Table S4. AIV genotyping for Atlantic flyway locations with 20 or more viruses.

| Location      | Viruses | Genotypes | Sub-genotypes | Repeatedly detected<br>sub-genotypes |
|---------------|---------|-----------|---------------|--------------------------------------|
| Newfoundland  | 31      | 19        | 24            | 3                                    |
| Quebec        | 20      | 6         | 10            | 4                                    |
| New Brunswick | 32      | 11        | 14            | 3                                    |
