# Supplementary material for: Genetic Structure of Avian Influenza Viruses from Ducks of the Atlantic Flyway of North America
Source: PubMed Central journal article supplement (PMC3907406; doi:10.1371/journal.pone.0086999), 2014-01-30
Supplement: pone.0086999.s010.pdf [file pone.0086999.s010.pdf]

Table S5. Repeated gene type detections across space and time in ducks of the Atlantic flyway over 2006-2011.

| <b>Segment</b> | <b>Gene type</b> | <b>Detection year/location<sup>a</sup></b>      | <b>Duration (years)</b>    |
|----------------|------------------|-------------------------------------------------|----------------------------|
| <b>PB2</b>     | C-2.1            | 2009/NL, 2010/NL                                | 2                          |
|                | C-2.2            | 2008/NL, 2009/NB, 2011/NL                       | 3                          |
|                | C-2.4            | 2009/NL, 2010/NL                                | 2                          |
|                | C-2.5            | 2010/NL, 2011/NL                                | 2                          |
|                | C-2.6            | 2006/QC, 2006/NB, 2006/NB, 2007/NB              | 2                          |
|                | C-2.7            | 2006/QC, 2006/MD, 2006/NB, 2007/MD,<br>2007/NB  | 2                          |
|                | C-2.8            | 2007/MD, 2007/NB, 2009/NB                       | 3                          |
|                | C-2.10           | 2006/NB, 2007/NL                                | 2                          |
|                | C-3.2            | 2006/QC, 2007/ON                                | 2                          |
|                | C-3.3            | 2006/QC, 2007/FL                                | 2                          |
|                | C-3.5            | 2009/PEI, 2009/NS, 2009/QC                      | 1                          |
|                | C-4.1            | 2007/NB, 2007/PEI                               | 1                          |
|                | <b>PB1</b>       | F-1.1                                           | 2010/NL, 2010/NL, 2011/NL  |
| F-3.1          |                  | 2009/NL, 2010/NL                                | 2                          |
| F-3.2          |                  | 2006/PEI, 2007/NL, 2008/NL                      | 3                          |
| F-3.5          |                  | 2006/NB, 2007/NB                                | 2                          |
| F-3.6          |                  | 2007/PEI, 2009/PEI                              | 3                          |
| F-3.8          |                  | 2006/QC, 2007/FL                                | 2                          |
| F-3.12         |                  | 2009/PEI, 2009/NB                               | 1                          |
| F-4.5          |                  | 2007/NB, 2009/NS, 2009/NB                       | 3                          |
| F-5.1          |                  | 2006/NB, 2006/NY, 2006/MD, 2007/MD              | 2                          |
| F-8.1          |                  | 2009/QC, 2009/NB                                | 1                          |
| <b>PA</b>      |                  | E-1.1                                           | 2009/NL, 2010/NL           |
|                | E-1.5            | 2006/NY, 2006/PA                                | 1                          |
|                | E-2.1            | 2008/NL, 2009/PEI, 2009/NS, 2009/NB,<br>2011/NL | 4                          |
|                | E-3.1            | 2006/QC, 2006/PEI                               | 1                          |
|                | E-5.1            | 2006/QC, 2006/NY, 2006/NB                       | 1                          |
|                | H-1.1            | 2006/PEI, 2008/NL                               | 3                          |
|                | H-1.5            | 2010/NL, 2011/NL                                | 2                          |
|                | H-1.15           | 2009/PEI, 2009/NB                               | 1                          |
|                | H-1.17           | 2007/NB, 2009/NB, 2009/PEI                      | 3                          |
|                | E-4.1            | 2006/NB, 2007/NB                                | 2                          |
|                | <b>NP</b>        | H-1.1                                           | 2009/PEI, 2009/NB, 2010/NL |
| H-1.2          |                  | 2006/QC, 2006/PEI, 2008/NL                      | 3                          |
| H-1.5          |                  | 2006/QC, 2006/NB, 2007/NB                       | 2                          |
| H-1.8          |                  | 2006/NB, 2007/NB                                | 2                          |
| H-2.1          |                  | 2010/NL, 2011/NL                                | 2                          |
| H-2.3          |                  | 2006/QC, 2007/NL                                | 2                          |
| H-2.4          |                  | 2006/MD, 2007/NB                                | 2                          |
| H-4.3          |                  | 2006/PEI, 2006/NY                               | 1                          |
| H-4.4          |                  | 2006/NY, 2006/PA                                | 1                          |

|           |         |                                                                   |   |
|-----------|---------|-------------------------------------------------------------------|---|
|           | H-4.6   | 2009/PEI, 2009/NS, 2009/NB                                        | 1 |
|           | H-6.1   | 2006/NB, 2007/FL                                                  | 2 |
|           | H-6.2   | 2006/QC, 2006/NB                                                  | 1 |
| <b>M</b>  | E-1.1   | 2009/NL, 2010/NL                                                  | 2 |
|           | E-1.3   | 2006/QC, 2006/MD, 2006/NB, 2006/NY,<br>2006/PA, 2008/NL, 2009/PEI | 4 |
|           | E-1.5   | 2006/NY, 2007/MD, 2007/NB, 2009/NB,<br>2010/NL                    | 5 |
|           | E-1.6   | 2010/NL, 2011/NL                                                  | 2 |
|           | E-1.7   | 2009/NL, 2011/NL                                                  | 3 |
|           | E-1.8   | 2006/NB, 2007/NB, 2007/PEI                                        | 2 |
|           | E-1.10  | 2006/NB, 2007/NB                                                  | 2 |
|           | E-1.16  | 2006/DE, 2007/ON, 2007/FL                                         | 2 |
|           | E-1.18  | 2007/NB, 2009/PEI                                                 | 3 |
|           | E-1.19  | 2009/PEI, 2009/NS, 2009/NB                                        | 1 |
|           | J-1.1   | 2009/QC, 2009/NB                                                  | 1 |
| <b>NS</b> | 1D-1.1  | 2006/NY, 2007/NL, 2008/NL                                         | 3 |
|           | 1D-1.5  | 2009/NL, 2010/NL                                                  | 2 |
|           | 1D-1.6  | 2006/PEI, 2007/NB, 2007/PEI                                       | 2 |
|           | 1D-1.7  | 2006/QC, 2006/NB, 2007/FL, 2007/ON,<br>2009/PEI                   | 4 |
|           | 1D-1.9  | 2006/QC, 2006/PA, 2007/NB                                         | 2 |
|           | 1D-1.10 | 2006/QC, 2006/MD, 2006/DE                                         | 1 |
|           | 1D-1.13 | 2009/PEI, 2009/NS, 2009/NB                                        | 1 |
|           | 1C-1.1  | 2009/QC, 2009/NB                                                  | 1 |
|           | 2B-1.6  | 2006/NB, 2006/PEI, 2007/NB                                        | 2 |
| <b>HA</b> | 3C-1.2  | 2006/QC, 2006/NB, 2006/PEI, 2007/NB                               | 2 |
|           | 3C-2.3  | 2007/NB, 2009/PEI                                                 | 3 |
|           | 3D-1.1  | 2007/NL, 2008/NL, 2010/NL                                         | 4 |
|           | 3D-1.2  | 2009/PEI, 2009/NS, 2009/NS                                        | 1 |
|           | 3D-2.1  | 2007/NB, 2009/PEI                                                 | 3 |
|           | 4A-1.4  | 2006/QC, 2006/NB                                                  | 1 |
|           | 4A-1.5  | 2006/PEI, 2007/NB, 2007/PEI                                       | 2 |
|           | 5C-1.2  | 2006/MD, 2007/MD, 2007/FL                                         | 2 |
|           | 5C-1.3  | 2006/NY, 2006/PA                                                  | 1 |
| <b>NA</b> | 2D-1.1  | 2006/MD, 2007/NL, 2009/NB, 2011/NL                                | 6 |
|           | 2D-1.3  | 2006/NY, 2006/PA, 2006/DE                                         | 1 |
|           | 6A-1.1  | 2006/NB, 2008/NL                                                  | 3 |
|           | 6A-1.2  | 2006/PEI, 2009/NB                                                 | 4 |
|           | 6A-3.2  | 2009/PEI, 2010/NL                                                 | 2 |
|           | 6A-4.2  | 2006/QC, 2007/NB                                                  | 2 |
|           | 8A-2.1  | 2008/NL, 2009/NS, 2009/NB                                         | 2 |
|           | 8A-2.2  | 2007/NB, 2009/PEI, 2009/NB                                        | 3 |

<sup>a</sup> NL, Newfoundland; QC, Quebec; MD, Maryland; NB, New Brunswick; PEI, Prince Edward Island; NY, New York; PA, Pennsylvania; DE, Delaware; ON, Ontario; FL, Florida; NS, Nova Scotia
