# Supplementary material for: Genetic Structure of Avian Influenza Viruses from Ducks of the Atlantic Flyway of North America
Source: PubMed Central journal article supplement (PMC3907406; doi:10.1371/journal.pone.0086999), 2014-01-30
Supplement: pone.0086999.s011.pdf [file pone.0086999.s011.pdf]

Table S6. Detection of the 248 Atlantic flyway AIV gene types through years in North American flyways.

| Segment | Gene type | Detection in NCBI database | Detection of the Newfoundland AIV gene types over 2007-2011 | Total period | Duration (years) |
|---------|-----------|----------------------------|-------------------------------------------------------------|--------------|------------------|
| PB2     | C-1.1     | No                         | 2008                                                        | 2008         | 1                |
|         | C-2.1     | 2005-2010                  | 2009-2010                                                   | 2005-2010    | 6                |
|         | C-2.2     | 2004-2009                  | 2008-2011                                                   | 2004-2011    | 8                |
|         | C-2.3     | 2003-2009                  | 2010                                                        | 2003-2010    | 8                |
|         | C-2.4     | No                         | 2009-2010                                                   | 2009-2010    | 2                |
|         | C-2.5     | 2000-2010                  | 2010-2011                                                   | 2000-2011    | 12               |
|         | C-2.6     | 2003-2007                  | No                                                          | 2003-2007    | 5                |
|         | C-2.7     | 2003-2009                  | No                                                          | 2003-2009    | 7                |
|         | C-2.8     | 2007-2009                  | No                                                          | 2007-2009    | 3                |
|         | C-2.9     | 2003-2006                  | No                                                          | 2003-2006    | 4                |
|         | C-2.10    | 2002-2007                  | 2007                                                        | 2002-2007    | 6                |
|         | C-2.11    | 2005-2007                  | No                                                          | 2005-2007    | 3                |
|         | C-2.12    | 2005-2007                  | No                                                          | 2005-2007    | 3                |
|         | C-2.13    | 1985-2007                  | No                                                          | 1985-2007    | 23               |
|         | C-2.14    | 2005-2006                  | No                                                          | 2005-2006    | 2                |
|         | C-2.15    | 2006-2009                  | No                                                          | 2006-2009    | 4                |
|         | C-2.16    | 2005-2007                  | No                                                          | 2005-2007    | 3                |
|         | C-2.17    | 2000-2006                  | No                                                          | 2000-2006    | 7                |
|         | C-2.18    | 2005-2009                  | No                                                          | 2005-2009    | 5                |
|         | C-2.19    | 2004-2007                  | No                                                          | 2004-2007    | 4                |
|         | C-3.1     | 1983-2010                  | 2011                                                        | 1983-2010    | 29               |
|         | C-3.2     | 2005-2007                  | No                                                          | 2005-2007    | 3                |
|         | C-3.3     | 2006                       | No                                                          | 2006         | 1                |
|         | C-3.4     | 2005-2008                  | No                                                          | 2005-2008    | 4                |
|         | C-3.5     | 2006-2009                  | No                                                          | 2006-2009    | 4                |
|         | C-4.1     | 2005-2007                  | No                                                          | 2005-2007    | 3                |
|         | C-5.1     | 2003-2006                  | No                                                          | 2003-2006    | 4                |
|         | J-1.1     | 2009                       | No                                                          | 2009         | 1                |
|         | J-1.2     | 2005-2009                  | No                                                          | 2005-2009    | 5                |
|         | PB1       | F-1.1                      | 2006-2010                                                   | 2010-2011    | 2006-2011        |
| F-1.2   |           | 2006-2009                  | 2010                                                        | 2006-2010    | 5                |
| F-1.3   |           | 2006-2009                  | No                                                          | 2006-2009    | 4                |
| F-1.4   |           | 2004-2007                  | No                                                          | 2004-2007    | 4                |
| F-2.1   |           | 2003-2010                  | 2011                                                        | 2003-2011    | 9                |
| F-2.2   |           | 2006                       | No                                                          | 2006         | 1                |
| F-3.1   |           | 2006-2009                  | 2009-2010                                                   | 2006-2010    | 5                |
| F-3.2   |           | 2003-2008                  | 2007-2008                                                   | 2003-2008    | 6                |
| F-3.3   |           | 2002-2009                  | No                                                          | 2002-2009    | 8                |
| F-3.4   |           | 2002-2008                  | No                                                          | 2002-2008    | 7                |
| F-3.5   |           | 2003-2007                  | No                                                          | 2003-2007    | 5                |
| F-3.6   |           | 2002-2009                  | No                                                          | 2002-2009    | 8                |
| F-3.7   |           | 2002-2009                  | No                                                          | 2002-2009    | 8                |

|    |        |           |           |           |    |
|----|--------|-----------|-----------|-----------|----|
|    | F-3.8  | 2006-2008 | No        | 2006-2008 | 3  |
|    | F-3.9  | 2002-2008 | No        | 2002-2008 | 7  |
|    | F-3.10 | 2005-2006 | No        | 2005-2006 | 2  |
|    | F-3.11 | 2002-2009 | No        | 2002-2009 | 8  |
|    | F-3.12 | 2006-2009 | No        | 2006-2009 | 4  |
|    | F-4.1  | 1999-2008 | 2011      | 1999-2011 | 13 |
|    | F-4.2  | 2007-2009 | 2008      | 2007-2009 | 3  |
|    | F-4.3  | 2009      | 2010      | 2009-2010 | 2  |
|    | F-4.4  | 2009-2010 | 2011      | 2009-2011 | 3  |
|    | F-4.5  | 2006-2009 | No        | 2006-2009 | 4  |
|    | F-4.6  | 2006-2010 | No        | 2006-2010 | 5  |
|    | F-4.7  | 1997-1010 | No        | 1997-1010 | 14 |
|    | F-5.1  | 2005-2009 | No        | 2005-2009 | 5  |
|    | F-5.2  | 2006-2009 | No        | 2006-2009 | 4  |
|    | F-6.1  | 2005-2008 | No        | 2005-2008 | 4  |
|    | F-6.2  | 2003-2007 | No        | 2003-2007 | 5  |
|    | F-7.1  | 2005-2007 | No        | 2005-2007 | 3  |
|    | F-8.1  | 2008-2009 | No        | 2008-2009 | 2  |
| PA | H-1.1  | 2002-2009 | 2010      | 2002-2010 | 9  |
|    | H-1.2  | 2006-2010 | 2008      | 2006-2010 | 5  |
|    | H-1.3  | 2005-2009 | 2009      | 2005-2009 | 5  |
|    | H-1.4  | 2002-2009 | 2010      | 2002-2010 | 9  |
|    | H-1.5  | 2009-2010 | 2010-2011 | 2009-2011 | 3  |
|    | H-1.6  | 2005-2009 | 2007      | 2005-2009 | 5  |
|    | H-1.7  | 2000-2006 | No        | 2000-2006 | 7  |
|    | H-1.8  | 2004-2006 | No        | 2004-2006 | 3  |
|    | H-1.9  | 2005-2010 | No        | 2005-2010 | 6  |
|    | H-1.10 | 2006-2009 | No        | 2006-2009 | 4  |
|    | H-1.11 | 1999-2009 | No        | 1999-2009 | 11 |
|    | H-1.12 | 2003-2009 | No        | 2003-2009 | 7  |
|    | H-1.13 | 2005-2007 | No        | 2005-2007 | 3  |
|    | H-1.14 | 2006-2008 | No        | 2006-2008 | 3  |
|    | H-1.15 | 1997-2010 | No        | 1997-2010 | 14 |
|    | H-1.16 | 2006-2009 | No        | 2006-2009 | 4  |
|    | H-1.17 | 2005-2009 | No        | 2005-2009 | 5  |
|    | E-1.1  | 2006-2009 | 2009-2010 | 2006-2010 | 5  |
|    | E-1.2  | 2006-2010 | 2011      | 2006-2011 | 5  |
|    | E-1.3  | 2006-2009 | No        | 2006-2009 | 4  |
|    | E-1.4  | 2006-2008 | No        | 2006-2008 | 3  |
|    | E-1.5  | 2005-2010 | No        | 2005-2010 | 6  |
|    | E-2.1  | 2007-2009 | 2008-2011 | 2007-2011 | 5  |
|    | E-2.2  | 1998-2008 | No        | 1998-2008 | 11 |
|    | E-3.1  | 2004-2010 | No        | 2004-2010 | 7  |
|    | E-3.2  | 2002-2007 | No        | 2002-2007 | 6  |
|    | E-3.3  | 2004-2009 | No        | 2004-2009 | 6  |
|    | E-3.4  | 2006-2009 | No        | 2006-2009 | 4  |

|    |         |           |           |           |    |
|----|---------|-----------|-----------|-----------|----|
|    | E-3.5   | 2000-2006 | No        | 2000-2006 | 7  |
|    | E-4.1   | 2005-2007 | No        | 2005-2007 | 3  |
|    | E-5.1   | 2002-2008 | No        | 2002-2008 | 7  |
|    | E-5.2   | 2002-2007 | No        | 2002-2007 | 6  |
|    | E-6.1   | 2006-2009 | No        | 2006-2009 | 4  |
|    | E-6.2   | 1998-2009 | No        | 1998-2009 | 12 |
| HA | 1D-1.1  | 2007-2009 | 2009      | 2007-2009 | 3  |
|    | 2H-1.1  | 2008-2009 | 2011      | 2008-2011 | 4  |
|    | 2H-1.2  | 2007      | 2008      | 2007-2008 | 2  |
|    | 2H-1.3  | 2008      | 2008      | 2008      | 1  |
|    | 2H-2.1  | 2006      | 2006      | 2006      | 1  |
|    | 3C-1.1  | 2004-2011 | 2011      | 2004-2011 | 8  |
|    | 3C-1.2  | 2005-2007 | No        | 2005-2007 | 3  |
|    | 3C-1.3  | 2006-2009 | No        | 2006-2009 | 4  |
|    | 3C-2.1  | 2005-2006 | No        | 2005-2006 | 2  |
|    | 3C-2.2  | 2002-2008 | No        | 2002-2008 | 7  |
|    | 3C-2.3  | 2007-2009 | No        | 2007-2009 | 3  |
|    | 3D-1.1  | 2007-2009 | 2007-2010 | 2007-2010 | 4  |
|    | 3D-1.2  | 2008-2009 | No        | 2008-2009 | 2  |
|    | 3D-1.3  | 2005-2009 | No        | 2005-2009 | 5  |
|    | 3D-2.1  | 2007-2009 | No        | 2007-2009 | 3  |
|    | 4A-1.1  | NO        | 2008      | 2008      | 1  |
|    | 4A-1.2  | NO        | 2010      | 2010      | 1  |
|    | 4A-1.3  | 2002-2006 | No        | 2002-2006 | 5  |
|    | 4A-1.4  | 2002-2008 | No        | 2002-2008 | 7  |
|    | 4A-1.5  | 2002-2007 | No        | 2002-2007 | 6  |
|    | 4A-1.6  | 2006      | No        | 2006      | 1  |
|    | 4A-2.1  | 2008-2009 | 2010      | 2008-2010 | 3  |
|    | 4A-3.1  | 2005-2009 | No        | 2005-2009 | 5  |
|    | 4A-3.2  | 2007-2009 | No        | 2007-2009 | 3  |
|    | 5C-1.1  | NO        | 2009      | 2009      | 1  |
|    | 5C-1.2  | 2004-2009 | No        | 2004-2009 | 6  |
|    | 5C-1.3  | 2004-2007 | No        | 2004-2007 | 4  |
|    | 5C-1.4  | 2004-2009 | No        | 2004-2009 | 6  |
|    | 5C-1.5  | 2004-2009 | No        | 2004-2009 | 6  |
|    | 6B-1.1  | 2008      | No        | 2008      | 1  |
|    | 7F-1.1  | 2005-2008 | No        | 2005-2008 | 4  |
|    | 7F-2.1  | 2004-2006 | No        | 2004-2006 | 3  |
|    | 11C-1.1 | NO        | 2010      | 2010      | 1  |
|    | 11C-1.2 | 2007-2009 | No        | 2007-2009 | 3  |
|    | 11C-2.1 | 2002-2006 | No        | 2002-2006 | 5  |
|    | 12A-1.1 | NO        | 2011      | 2011      | 1  |
|    | 13A-1.1 | 2009      | No        | 2009      | 1  |
|    | 16D-1.1 | 2009      | No        | 2009      | 1  |
| NA | 1E-1.1  | 2007-2009 | 2009      | 2007-2009 | 3  |
|    | 1E-2.1  | 2006-2009 | No        | 2006-2009 | 4  |

|    |        |           |           |           |    |
|----|--------|-----------|-----------|-----------|----|
|    | 1E-2.2 | 2006-2009 | No        | 2006-2009 | 4  |
|    | 2D-1.1 | 2006-2009 | 2007-2011 | 2006-2011 | 6  |
|    | 2D-1.2 | No        | 2011      | 2011      | 1  |
|    | 2D-1.3 | 2000-2009 | No        | 2000-2009 | 10 |
|    | 2D-2.1 | 2003-2006 | No        | 2003-2006 | 4  |
|    | 2D-3.1 | 2001-2009 | No        | 2001-2009 | 9  |
|    | 2G-1.1 | 2005-2006 | No        | 2005-2006 | 2  |
|    | 2G-1.2 | 2001-2010 | No        | 2001-2010 | 10 |
|    | 3A-1.1 | 1978      | 2010      | 1978-2010 | 33 |
|    | 3A-2.1 | 2003-2007 | No        | 2003-2007 | 5  |
|    | 3A-2.2 | 2004-2008 | No        | 2004-2008 | 6  |
|    | 3D-1.1 | 2009      | No        | 2009      | 1  |
|    | 4A-1.1 | 2008      | 2008      | 2008      | 1  |
|    | 6A-1.1 | 1999-2007 | 2008      | 1999-2008 | 10 |
|    | 6A-1.2 | 2009      | No        | 2009      | 1  |
|    | 6A-1.3 | 2005-2007 | No        | 2005-2007 | 3  |
|    | 6A-2.1 | 2007-2009 | 2010      | 2007-2010 | 4  |
|    | 6A-3.1 | 2006-2009 | 2010      | 2006-2010 | 5  |
|    | 6A-3.2 | 2004-2009 | 2010      | 2004-2010 | 7  |
|    | 6A-3.3 | 2006      | No        | 2006      | 1  |
|    | 6A-3.4 | 2004-2009 | No        | 2004-2009 | 6  |
|    | 6A-4.1 | 1998-2008 | No        | 1998-2008 | 11 |
|    | 6A-4.2 | 2002-2009 | No        | 2002-2009 | 8  |
|    | 6A-4.3 | 2002-2007 | No        | 2002-2007 | 6  |
|    | 8A-1.1 | 2005-2007 | No        | 2005-2007 | 3  |
|    | 8A-1.2 | 2005-2007 | No        | 2005-2007 | 3  |
|    | 8A-1.3 | 2005-2006 | 2010      | 2005-2010 | 6  |
|    | 8A-1.4 | 2005-2007 | No        | 2005-2007 | 3  |
|    | 8A-2.1 | 2006-2009 | 2008      | 2006-2009 | 4  |
|    | 8A-2.2 | 2007-2009 | No        | 2007-2009 | 3  |
|    | 8A-3.1 | 2005-2009 | No        | 2005-2009 | 5  |
|    | 9A-1.1 | 2007-2009 | No        | 2007-2009 | 3  |
|    | 9A-1.2 | 2007-2010 | No        | 2007-2010 | 4  |
|    | 9A-1.3 | 2007-2010 | No        | 2007-2010 | 4  |
|    | 9A-2.1 | 2005-2006 | No        | 2005-2006 | 2  |
|    | 9A-3.1 | 2006-2009 | No        | 2006-2009 | 4  |
| NP | F-1.1  | 2001-2011 | No        | 2001-2011 | 11 |
|    | H-1.1  | 2006-2009 | 2010      | 2006-2010 | 5  |
|    | H-1.2  | 2001-2009 | 2008      | 2001-2009 | 9  |
|    | H-1.3  | No        | 2010      | 2010      | 1  |
|    | H-1.4  | 2005-2009 | 2011      | 2005-2011 | 7  |
|    | H-1.5  | 1985-2007 | No        | 1985-2007 | 23 |
|    | H-1.6  | 2003-2009 | No        | 2003-2009 | 7  |
|    | H-1.7  | 1999-2009 | No        | 1999-2009 | 11 |
|    | H-1.8  | 2006-2007 | No        | 2006-2007 | 2  |
|    | H-1.9  | 2006-2009 | No        | 2006-2009 | 4  |

|    |        |           |           |           |    |
|----|--------|-----------|-----------|-----------|----|
|    | H-2.1  | 2008-2009 | 2010-2011 | 2008-2011 | 4  |
|    | H-2.2  | 2006-2007 | 2010      | 2006-2010 | 5  |
|    | H-2.3  | 2005-2008 | 2007      | 2005-2008 | 4  |
|    | H-2.4  | 2006-2010 | No        | 2006-2010 | 5  |
|    | H-2.5  | 2005-2009 | No        | 2005-2009 | 5  |
|    | H-3.1  | 2006-2009 | 2008      | 2006-2009 | 4  |
|    | H-3.2  | 2006-2007 | 2007      | 2006-2007 | 2  |
|    | H-3.3  | 2006-2007 | No        | 2006-2007 | 2  |
|    | H-3.4  | 2006-2007 | No        | 2006-2007 | 2  |
|    | H-4.1  | 2003-2009 | 2009      | 2003-2009 | 7  |
|    | H-4.2  | 2004-2009 | 2009      | 2004-2009 | 6  |
|    | H-4.3  | 2005-2007 | No        | 2005-2007 | 3  |
|    | H-4.4  | 2003-2009 | No        | 2003-2009 | 7  |
|    | H-4.5  | 2004-2009 | No        | 2004-2009 | 6  |
|    | H-4.6  | 2003-2009 | No        | 2003-2009 | 7  |
|    | H-4.7  | 2004-2009 | No        | 2004-2009 | 6  |
|    | H-5.1  | 2009      | 2011      | 2009-2011 | 3  |
|    | H-5.2  | 2004-2006 | No        | 2004-2006 | 3  |
|    | H-6.1  | 2001-2009 | No        | 2001-2009 | 9  |
|    | H-6.2  | 2002-2009 | No        | 2002-2009 | 8  |
|    | H-7.1  | 2005-2006 | No        | 2005-2006 | 2  |
|    | D-1.1  | 1999-2009 | No        | 1999-2009 | 11 |
| M  | E-1.1  | 2006-2010 | 2009-2010 | 2006-2010 | 5  |
|    | E-1.2  | 2006-2009 | 2011      | 2006-2011 | 6  |
|    | E-1.3  | 1985-2009 | 2008      | 1985-2009 | 25 |
|    | E-1.4  | 2006      | No        | 2006      | 1  |
|    | E-1.5  | 1998-2009 | 2010      | 1998-2010 | 13 |
|    | E-1.6  | 2004-2010 | 2010-2011 | 2004-2011 | 8  |
|    | E-1.7  | 2005-2010 | 2009-2011 | 2005-2011 | 7  |
|    | E-1.8  | 1998-2009 | No        | 1998-2009 | 12 |
|    | E-1.9  | 1996-2009 | No        | 1996-2009 | 14 |
|    | E-1.10 | 1998-2009 | No        | 1998-2009 | 12 |
|    | E-1.11 | 1996-2007 | No        | 1996-2007 | 12 |
|    | E-1.12 | 1998-2010 | 2007      | 1998-2010 | 13 |
|    | E-1.13 | 2002-2010 | No        | 2002-2010 | 9  |
|    | E-1.14 | 1998-2009 | No        | 1998-2009 | 12 |
|    | E-1.15 | 1998-2007 | No        | 1998-2007 | 10 |
|    | E-1.16 | 2001-2007 | No        | 2001-2007 | 7  |
|    | E-1.17 | 1998-2009 | No        | 1998-2009 | 12 |
|    | E-1.18 | 1996-2009 | No        | 1996-2009 | 14 |
|    | E-1.19 | 1987-2009 | No        | 1987-2009 | 13 |
|    | E-1.20 | 1991-2010 | No        | 1991-2010 | 20 |
|    | E-1.21 | 1986-2009 | No        | 1986-2009 | 24 |
|    | E-2.1  | 2005-2006 | No        | 2005-2006 | 2  |
|    | J-1.1  | 2005-2009 | No        | 2005-2009 | 4  |
| NS | 1D-1.1 | 2003-2010 | 2007-2008 | 2003-2010 | 8  |

|              |            |                  |                  |           |
|--------------|------------|------------------|------------------|-----------|
| 1D-1.2       | 2005-2010  | 2010             | 2005-2010        | 6         |
| 1D-1.3       | 2005-2010  | 2011             | 2005-2011        | 7         |
| 1D-1.4       | 1987-2010  | 2010             | 1987-2010        | 24        |
| 1D-1.5       | 1999-2010  | 2009-2010        | 1999-2010        | 12        |
| 1D-1.6       | 1998-2007  | No               | 1998-2007        | 10        |
| 1D-1.7       | 1988-2009  | No               | 1988-2009        | 22        |
| 1D-1.8       | 1995-2010  | No               | 1995-2010        | 16        |
| 1D-1.9       | 2002-2009  | No               | 2002-2009        | 8         |
| 1D-1.10      | 1999-2007  | No               | 1999-2007        | 9         |
| 1D-1.11      | 2002-2009  | No               | 2002-2009        | 8         |
| 1D-1.12      | 1998-2006  | No               | 1998-2006        | 9         |
| 1D-1.13      | 1999-2010  | No               | 1999-2010        | 12        |
| 1C-1.1       | 1999-2009  | No               | 1999-2009        | 11        |
| 2B-1.1       | 1998-2009  | 2009             | 1998-2009        | 12        |
| 2B-1.2       | 1985-2009  | 2009-2011        | 1985-2011        | 27        |
| 2B-1.3       | 1985-2009  | 2011             | 1985-2011        | 27        |
| 2B-1.4       | 1998-2008  | No               | 1998-2008        | 11        |
| 2B-1.5       | 1998-2008  | No               | 1998-2008        | 11        |
| 2B-1.6       | 2000-2007  | No               | 2000-2007        | 8         |
| 2B-1.7       | 2002-2009  | No               | 2002-2009        | 8         |
| 2B-1.8       | 1991-2009  | No               | 1991-2009        | 19        |
| 2B-2.1       | 2004-2006  | No               | 2004-2006        | 3         |
| <b>Total</b> | <b>248</b> | <b>1978-2011</b> | <b>2007-2011</b> | <b>34</b> |
