# Supplementary material for: Genetic Structure of Avian Influenza Viruses from Ducks of the Atlantic Flyway of North America
Source: PubMed Central journal article supplement (PMC3907406; doi:10.1371/journal.pone.0086999), 2014-01-30
Supplement: pone.0086999.s012.pdf [file pone.0086999.s012.pdf]

Table S7. Detection of the 248 identified Atlantic flyway AIV gene types in the North American flyways.

| Gene type    | Flyway     |             |           |           |
|--------------|------------|-------------|-----------|-----------|
|              | Atlantic   | Mississippi | Central   | Pacific   |
| <b>PB2</b>   |            |             |           |           |
| C-1.1        | 6          | 0           | 0         | 0         |
| C-2.1        | 8          | 16          | 14        | 2         |
| C-2.2        | 33         | 18          | 0         | 0         |
| C-2.3        | 26         | 49          | 4         | 9         |
| C-2.4        | 3          | 0           | 0         | 0         |
| C-2.5        | 10         | 20          | 15        | 16        |
| C-2.6        | 41         | 12          | 4         | 0         |
| C-2.7        | 53         | 20          | 3         | 0         |
| C-2.8        | 1          | 3           | 0         | 0         |
| C-2.9        | 2          | 2           | 3         | 0         |
| C-2.10       | 10         | 0           | 1         | 0         |
| C-2.11       | 7          | 2           | 0         | 0         |
| C-2.12       | 32         | 2           | 2         | 0         |
| C-2.13       | 19         | 4           | 1         | 0         |
| C-2.14       | 2          | 0           | 0         | 0         |
| C-2.15       | 22         | 26          | 17        | 4         |
| C-2.16       | 27         | 2           | 1         | 0         |
| C-2.17       | 1          | 1           | 0         | 0         |
| C-2.18       | 6          | 1           | 0         | 0         |
| C-2.19       | 14         | 1           | 3         | 1         |
| C-3.1        | 18         | 62          | 17        | 63        |
| C-3.2        | 11         | 1           | 0         | 0         |
| C-3.3        | 2          | 0           | 0         | 0         |
| C-3.4        | 1          | 2           | 0         | 0         |
| C-3.5        | 9          | 11          | 1         | 4         |
| C-4.1        | 12         | 0           | 0         | 0         |
| C-5.1        | 99         | 0           | 0         | 0         |
| J-1.1        | 4          | 0           | 0         | 0         |
| J-1.2        | 13         | 0           | 0         | 0         |
| <b>Total</b> | <b>492</b> | <b>255</b>  | <b>86</b> | <b>99</b> |
| <b>PB1</b>   |            |             |           |           |
| F-1.1        | 3          | 1           | 7         | 2         |
| F-1.2        | 4          | 1           | 2         | 9         |
| F-1.3        | 4          | 6           | 8         | 5         |
| F-1.4        | 36         | 7           | 0         | 0         |
| F-2.1        | 4          | 47          | 11        | 21        |
| F-2.2        | 1          | 0           | 0         | 0         |
| F-3.1        | 8          | 39          | 0         | 0         |
| F-3.2        | 39         | 1           | 0         | 0         |
| F-3.3        | 54         | 45          | 0         | 0         |
| F-3.4        | 16         | 28          | 0         | 0         |
| F-3.5        | 22         | 6           | 0         | 0         |

|              |                 |                    |                |                |
|--------------|-----------------|--------------------|----------------|----------------|
| F-3.6        | 54              | 45                 | 0              | 0              |
| F-3.7        | 32              | 41                 | 0              | 0              |
| F-3.8        | 1               | 2                  | 1              | 4              |
| F-3.9        | 18              | 35                 | 0              | 0              |
| F-3.10       | 128             | 0                  | 0              | 0              |
| F-3.11       | 1               | 1                  | 0              | 0              |
| F-3.12       | 1               | 2                  | 3              | 0              |
| F-4.1        | 5               | 25                 | 0              | 0              |
| F-4.2        | 2               | 28                 | 1              | 0              |
| F-4.3        | 1               | 2                  | 0              | 0              |
| F-4.4        | 1               | 2                  | 4              | 3              |
| F-4.5        | 9               | 3                  | 1              | 0              |
| F-4.6        | 9               | 19                 | 15             | 5              |
| F-4.7        | 1               | 5                  | 4              | 24             |
| F-5.1        | 35              | 54                 | 6              | 6              |
| F-5.2        | 35              | 53                 | 2              | 4              |
| F-6.1        | 24              | 0                  | 0              | 0              |
| F-6.2        | 35              | 4                  | 1              | 0              |
| F-7.1        | 4               | 4                  | 0              | 0              |
| F-8.1        | 6               | 0                  | 0              | 0              |
| <b>Total</b> | <b>593</b>      | <b>506</b>         | <b>66</b>      | <b>83</b>      |
| <b>PA</b>    | <b>Atlantic</b> | <b>Mississippi</b> | <b>Central</b> | <b>Pacific</b> |
| H-1.1        | 86              | 23                 | 11             | 24             |
| H-1.2        | 1               | 1                  | 7              | 15             |
| H-1.3        | 11              | 1                  | 1              | 1              |
| H-1.4        | 77              | 17                 | 9              | 2              |
| H-1.5        | 10              | 1                  | 2              | 0              |
| H-1.6        | 4               | 2                  | 0              | 0              |
| H-1.7        | 10              | 0                  | 2              | 0              |
| H-1.8        | 131             | 0                  | 0              | 0              |
| H-1.9        | 6               | 12                 | 4              | 30             |
| H-1.10       | 2               | 1                  | 0              | 0              |
| H-1.11       | 13              | 5                  | 16             | 12             |
| H-1.12       | 16              | 36                 | 11             | 27             |
| H-1.13       | 3               | 1                  | 1              | 1              |
| H-1.14       | 27              | 39                 | 4              | 6              |
| H-1.15       | 4               | 7                  | 13             | 16             |
| H-1.16       | 6               | 9                  | 4              | 33             |
| H-1.17       | 72              | 7                  | 3              | 4              |
| E-1.1        | 6               | 78                 | 16             | 2              |
| E-1.2        | 3               | 27                 | 10             | 8              |
| E-1.3        | 1               | 78                 | 16             | 2              |
| E-1.4        | 2               | 1                  | 32             | 0              |
| E-1.5        | 14              | 19                 | 6              | 49             |
| E-2.1        | 35              | 24                 | 2              | 0              |
| E-2.2        | 18              | 19                 | 2              | 1              |

|              |                 |                    |                |                |
|--------------|-----------------|--------------------|----------------|----------------|
| E-3.1        | 22              | 49                 | 15             | 0              |
| E-3.2        | 52              | 12                 | 0              | 0              |
| E-3.3        | 21              | 48                 | 11             | 0              |
| E-3.4        | 1               | 4                  | 4              | 0              |
| E-3.5        | 7               | 6                  | 1              | 1              |
| E-4.1        | 12              | 0                  | 0              | 0              |
| E-5.1        | 76              | 6                  | 2              | 0              |
| E-5.2        | 47              | 9                  | 0              | 0              |
| E-6.1        | 7               | 0                  | 0              | 0              |
| E-6.2        | 4               | 0                  | 0              | 0              |
| <b>Total</b> | <b>807</b>      | <b>542</b>         | <b>205</b>     | <b>234</b>     |
| <b>HA</b>    | <b>Atlantic</b> | <b>Mississippi</b> | <b>Central</b> | <b>Pacific</b> |
| 1D-1.1       | 3               | 11                 | 5              | 3              |
| 2H-1.1       | 2               | 6                  | 0              | 0              |
| 2H-1.2       | 2               | 1                  | 0              | 0              |
| 2H-1.3       | 1               | 0                  | 0              | 1              |
| 2H-2.1       | 3               | 0                  | 0              | 0              |
| 3C-1.1       | 6               | 15                 | 3              | 0              |
| 3C-1.2       | 8               | 0                  | 0              | 0              |
| 3C-1.3       | 1               | 7                  | 2              | 0              |
| 3C-2.1       | 9               | 0                  | 0              | 0              |
| 3C-2.2       | 5               | 14                 | 0              | 0              |
| 3C-2.3       | 2               | 0                  | 0              | 0              |
| 3D-1.1       | 23              | 0                  | 0              | 0              |
| 3D-1.2       | 16              | 0                  | 0              | 0              |
| 3D-1.3       | 7               | 0                  | 0              | 0              |
| 3D-2.1       | 8               | 0                  | 0              | 0              |
| 4A-1.1       | 3               | 0                  | 0              | 0              |
| 4A-1.2       | 1               | 0                  | 0              | 0              |
| 4A-1.3       | 9               | 3                  | 1              | 0              |
| 4A-1.4       | 36              | 5                  | 0              | 0              |
| 4A-1.5       | 4               | 1                  | 0              | 0              |
| 4A-1.6       | 4               | 0                  | 0              | 0              |
| 4A-2.1       | 2               | 2                  | 1              | 2              |
| 4A-3.1       | 1               | 0                  | 1              | 0              |
| 4A-3.2       | 7               | 93                 | 43             | 1              |
| 5C-1.1       | 4               | 3                  | 0              | 2              |
| 5C-1.2       | 63              | 37                 | 5              | 0              |
| 5C-1.3       | 15              | 8                  | 1              | 0              |
| 5C-1.4       | 44              | 15                 | 1              | 0              |
| 5C-1.5       | 47              | 38                 | 5              | 0              |
| 6B-1.1       | 3               | 0                  | 0              | 0              |
| 7F-1.1       | 1               | 0                  | 0              | 0              |
| 7F-2.1       | 76              | 0                  | 0              | 0              |
| 11C-1.1      | 2               | 0                  | 0              | 0              |
| 11C-1.2      | 1               | 10                 | 0              | 0              |

|              |                 |                    |                |                |
|--------------|-----------------|--------------------|----------------|----------------|
| 11C-2.1      | 16              | 4                  | 0              | 0              |
| 12A-1.1      | 1               | 0                  | 0              | 0              |
| 13A-1.1      | 4               | 0                  | 0              | 0              |
| 16D-1.1      | 1               | 0                  | 0              | 0              |
| <b>Total</b> | <b>441</b>      | <b>273</b>         | <b>68</b>      | <b>9</b>       |
| <b>NP</b>    | <b>Atlantic</b> | <b>Mississippi</b> | <b>Central</b> | <b>Pacific</b> |
| F-1.1        | 3               | 1                  | 1              | 75             |
| H-1.1        | 8               | 14                 | 17             | 4              |
| H-1.2        | 42              | 34                 | 30             | 11             |
| H-1.3        | 2               | 0                  | 0              | 0              |
| H-1.4        | 14              | 23                 | 9              | 13             |
| H-1.5        | 32              | 1                  | 0              | 1              |
| H-1.6        | 4               | 8                  | 3              | 24             |
| H-1.7        | 21              | 16                 | 18             | 2              |
| H-1.8        | 4               | 0                  | 0              | 0              |
| H-1.9        | 2               | 4                  | 0              | 0              |
| H-2.1        | 6               | 1                  | 0              | 3              |
| H-2.2        | 4               | 10                 | 6              | 2              |
| H-2.3        | 15              | 4                  | 4              | 7              |
| H-2.4        | 4               | 12                 | 7              | 7              |
| H-2.5        | 9               | 12                 | 4              | 31             |
| H-3.1        | 7               | 2                  | 0              | 1              |
| H-3.2        | 2               | 1                  | 0              | 1              |
| H-3.3        | 2               | 2                  | 0              | 1              |
| H-3.4        | 5               | 1                  | 0              | 1              |
| H-4.1        | 7               | 7                  | 0              | 0              |
| H-4.2        | 8               | 1                  | 0              | 0              |
| H-4.3        | 30              | 3                  | 1              | 0              |
| H-4.4        | 21              | 10                 | 0              | 0              |
| H-4.5        | 21              | 12                 | 0              | 0              |
| H-4.6        | 17              | 3                  | 0              | 0              |
| H-4.7        | 29              | 11                 | 0              | 0              |
| H-5.1        | 2               | 1                  | 0              | 0              |
| H-5.2        | 18              | 3                  | 0              | 0              |
| H-6.1        | 34              | 29                 | 5              | 5              |
| H-6.2        | 42              | 43                 | 6              | 19             |
| H-7.1        | 94              | 0                  | 0              | 0              |
| D-1.1        | 7               | 0                  | 0              | 0              |
| <b>Total</b> | <b>516</b>      | <b>269</b>         | <b>111</b>     | <b>208</b>     |
| <b>NA</b>    | <b>Atlantic</b> | <b>Mississippi</b> | <b>Central</b> | <b>Pacific</b> |
| 1E-1.1       | 5               | 31                 | 1              | 7              |
| 1E- 2.1      | 7               | 16                 | 6              | 30             |
| 1E- 2.2      | 7               | 15                 | 6              | 21             |
| 2D-1.1       | 5               | 19                 | 1              | 18             |
| 2D-1.2       | 1               | 0                  | 0              | 0              |
| 2D-1.3       | 17              | 16                 | 0              | 0              |

|              |                 |                    |                |                |
|--------------|-----------------|--------------------|----------------|----------------|
| 2D-2.1       | 10              | 0                  | 0              | 0              |
| 2D-3.1       | 39              | 34                 | 4              | 0              |
| 2G-1.1       | 98              | 0                  | 0              | 0              |
| 2G-1.2       | 10              | 31                 | 1              | 2              |
| 3A-1.1       | 1               | 0                  | 1              | 0              |
| 3A-2.1       | 6               | 0                  | 0              | 0              |
| 3A-2.2       | 10              | 4                  | 2              | 15             |
| 3D-1.1       | 1               | 0                  | 0              | 0              |
| 4A-1.1       | 5               | 0                  | 0              | 0              |
| 6A-1.1       | 14              | 1                  | 0              | 0              |
| 6A-1.2       | 4               | 0                  | 0              | 0              |
| 6A-1.3       | 10              | 0                  | 0              | 0              |
| 6A-2.1       | 23              | 0                  | 0              | 0              |
| 6A-3.1       | 3               | 1                  | 4              | 0              |
| 6A-3.2       | 22              | 8                  | 27             | 19             |
| 6A-3.3       | 4               | 2                  | 0              | 0              |
| 6A-3.4       | 8               | 6                  | 19             | 15             |
| 6A-4.1       | 16              | 7                  | 5              | 0              |
| 6A-4.2       | 16              | 7                  | 1              | 0              |
| 6A-4.3       | 5               | 6                  | 0              | 0              |
| 8A-1.1       | 8               | 0                  | 0              | 0              |
| 8A-1.2       | 8               | 0                  | 0              | 0              |
| 8A-1.3       | 4               | 0                  | 0              | 0              |
| 8A-1.4       | 7               | 0                  | 0              | 0              |
| 8A-2.1       | 10              | 8                  | 0              | 0              |
| 8A-2.2       | 10              | 0                  | 0              | 0              |
| 8A-3.1       | 3               | 18                 | 12             | 2              |
| 9A-1.1       | 4               | 12                 | 0              | 0              |
| 9A-1.2       | 4               | 20                 | 0              | 0              |
| 9A-1.3       | 4               | 22                 | 0              | 0              |
| 9A-2.1       | 6               | 0                  | 0              | 0              |
| 9A-3.1       | 1               | 1                  | 0              | 0              |
| <b>Total</b> | <b>416</b>      | <b>285</b>         | <b>90</b>      | <b>129</b>     |
| <b>M</b>     | <b>Atlantic</b> | <b>Mississippi</b> | <b>Central</b> | <b>Pacific</b> |
| E-1.1        | 9               | 16                 | 12             | 14             |
| E-1.2        | 6               | 7                  | 1              | 3              |
| E-1.3        | 115             | 23                 | 2              | 25             |
| E-1.4        | 3               | 0                  | 0              | 0              |
| E-1.5        | 135             | 80                 | 16             | 22             |
| E-1.6        | 7               | 20                 | 9              | 40             |
| E-1.7        | 11              | 57                 | 16             | 109            |
| E-1.8        | 33              | 46                 | 20             | 5              |
| E-1.9        | 138             | 78                 | 15             | 19             |
| E-1.10       | 115             | 87                 | 22             | 26             |
| E-1.11       | 11              | 9                  | 2              | 3              |
| E-1.12       | 121             | 76                 | 27             | 28             |

|              |                 |                    |                |                |
|--------------|-----------------|--------------------|----------------|----------------|
| E-1.13       | 12              | 52                 | 34             | 143            |
| E-1.14       | 59              | 52                 | 16             | 24             |
| E-1.15       | 6               | 1                  | 2              | 4              |
| E-1.16       | 6               | 6                  | 6              | 0              |
| E-1.17       | 102             | 81                 | 24             | 18             |
| E-1.18       | 69              | 15                 | 10             | 6              |
| E-1.19       | 21              | 1                  | 9              | 18             |
| E-1.20       | 2               | 17                 | 13             | 16             |
| E-1.21       | 11              | 2                  | 7              | 0              |
| E-2.1        | 107             | 0                  | 0              | 0              |
| J-1.1        | 10              | 0                  | 0              | 0              |
| <b>Total</b> | <b>1109</b>     | <b>726</b>         | <b>263</b>     | <b>523</b>     |
| <b>NS</b>    | <b>Atlantic</b> | <b>Mississippi</b> | <b>Central</b> | <b>Pacific</b> |
| 1D-1.1       | 52              | 10                 | 6              | 7              |
| 1D-1.2       | 3               | 31                 | 6              | 17             |
| 1D-1.3       | 1               | 12                 | 3              | 3              |
| 1D-1.4       | 60              | 35                 | 9              | 16             |
| 1D-1.5       | 20              | 15                 | 6              | 23             |
| 1D-1.6       | 30              | 26                 | 3              | 0              |
| 1D-1.7       | 90              | 52                 | 10             | 8              |
| 1D-1.8       | 91              | 54                 | 13             | 8              |
| 1D-1.9       | 44              | 11                 | 7              | 8              |
| 1D-1.10      | 10              | 7                  | 8              | 26             |
| 1D-1.11      | 13              | 11                 | 0              | 2              |
| 1D-1.12      | 2               | 6                  | 1              | 0              |
| 1D-1.13      | 12              | 18                 | 6              | 37             |
| 1C-1.1       | 6               | 0                  | 0              | 0              |
| 2B-1.1       | 8               | 15                 | 28             | 0              |
| 2B-1.2       | 22              | 27                 | 36             | 10             |
| 2B-1.3       | 15              | 16                 | 4              | 38             |
| 2B-1.4       | 6               | 17                 | 0              | 0              |
| 2B-1.5       | 9               | 14                 | 2              | 38             |
| 2B-1.6       | 10              | 7                  | 2              | 37             |
| 2B-1.7       | 14              | 4                  | 0              | 0              |
| 2B-1.8       | 7               | 4                  | 14             | 25             |
| 2B-2.1       | 97              | 0                  | 0              | 0              |
| <b>Total</b> | <b>622</b>      | <b>392</b>         | <b>164</b>     | <b>303</b>     |
