# Supplementary material for: Genetic Structure of Avian Influenza Viruses from Ducks of the Atlantic Flyway of North America
Source: PubMed Central journal article supplement (PMC3907406; doi:10.1371/journal.pone.0086999), 2014-01-30
Supplement: pone.0086999.s013.pdf [file pone.0086999.s013.pdf]

Table S8. Summary of detections of the Atlantic Flyway duck AIV genes in non-duck hosts.

| Sub-lineage | Number of gene types | Gene types found outside ducks                           |
|-------------|----------------------|----------------------------------------------------------|
| <b>PB2</b>  |                      |                                                          |
| C-1         | 1                    | ND <sup>a</sup>                                          |
| C-2         | 19                   | C-2.2, 2.3, 2.5, 2.7, 2.12, 2.13, 2.15, 2.16, 2.19       |
| C-3         | 5                    | C-3.1, 3.5                                               |
| C-4         | 1                    | C-4.1                                                    |
| C-5         | 1                    | C-5.1                                                    |
| J-1         | 2                    | J-1.1                                                    |
| Total       | 29                   | 14                                                       |
| <b>PB1</b>  |                      |                                                          |
| F-1         | 4                    | F-1.3, 1.4                                               |
| F-2         | 2                    | F-2.1                                                    |
| F-3         | 12                   | F-3.2, 3.3, 3.4, 3.5, 3.6, 3.7, 3.9, 3.10                |
| F-4         | 7                    | F-4.5, 4.7                                               |
| F-5         | 2                    | F-5.1, 5.2                                               |
| F-6         | 2                    | F-6.1, 6.2                                               |
| F-7         | 1                    | ND                                                       |
| F-8         | 1                    | F-8.1                                                    |
| Total       | 31                   | 18                                                       |
| <b>PA</b>   |                      |                                                          |
| H-1         | 17                   | H-1.1, 1.5, 1.8, 1.9, 1.11, 1.12, 1.13, 1.14, 1.16, 1.17 |
| E-1         | 5                    | E-1.1, 1.4, 1.5                                          |
| E-2         | 2                    | E-2.1, 2.2                                               |
| E-3         | 5                    | E-3.1, 3.2, 3.3                                          |
| E-4         | 1                    | ND                                                       |
| E-5         | 2                    | E-5.1, 5.2                                               |
| E-6         | 2                    | E-6.1, 6.2                                               |
| Total       | 34                   | 22                                                       |
| <b>HA</b>   |                      |                                                          |
| 1D-1        | 1                    | 1D-1.1                                                   |
| 2H-1        | 3                    | 2H-1.2                                                   |
| 2H-2        | 1                    | ND                                                       |
| 3C-1        | 3                    | 3C-1.2                                                   |
| 3C-2        | 3                    | ND                                                       |
| 3D-1        | 3                    | 3D-1.1                                                   |
| 3D-2        | 1                    | ND                                                       |
| 4A-1        | 6                    | 4A-1.1, 1.4                                              |
| 4A-2        | 1                    | ND                                                       |
| 4A-3        | 2                    | 4A-3.2                                                   |
| 5C-1        | 5                    | 5C-1.2, 1.3, 1.4, 1.5                                    |
| 6B-1        | 1                    | 6B-1.1                                                   |
| 7F-1        | 1                    | ND                                                       |
| 7F-2        | 1                    | 7F-2.1                                                   |

|       |    |                                                  |
|-------|----|--------------------------------------------------|
| 11C-1 | 2  | ND                                               |
| 11C-2 | 1  | ND                                               |
| 12A-1 | 1  | ND                                               |
| 13A-1 | 1  | 13A-1.1                                          |
| 16D-1 | 1  | ND                                               |
| Total | 38 | 14                                               |
| <hr/> |    |                                                  |
| NP    |    |                                                  |
| F-1   | 1  | F-1.1                                            |
| H-1   | 9  | H-1.2, 1.4, 1.5, 1.6, 1.7                        |
| H-2   | 5  | H-2.3, 2.4, 2.5                                  |
| H-3   | 4  | H-3.1, 3.4                                       |
| H-4   | 7  | H-4.3, 4.4, 4.5, 4.6                             |
| H-5   | 2  | H-5.2                                            |
| H-6   | 2  | H-6.2                                            |
| H-7   | 1  | H-7.1                                            |
| D-1   | 1  | D-1.1                                            |
| Total | 32 | 19                                               |
| <hr/> |    |                                                  |
| NA    |    |                                                  |
| 1E-1  | 1  | ND                                               |
| 1E-2  | 2  | 1E -2.1, 2.2                                     |
| 2D-1  | 3  | 2D-1.1, 1.3                                      |
| 2D-2  | 1  | 2D-2.1                                           |
| 2D-3  | 1  | 2D-3.1                                           |
| 2G-1  | 2  | 2G-1.1, 1.2                                      |
| 3A-1  | 1  | ND                                               |
| 3A-2  | 2  | 3A-2.1, 2.2                                      |
| 3D-1  | 1  | ND                                               |
| 4A-1  | 1  | 4A-1.1                                           |
| 6A-1  | 3  | 6A-1.1, 1.2                                      |
| 6A-2  | 1  | ND                                               |
| 6A-3  | 4  | 6A-3.2                                           |
| 6A-4  | 3  | ND                                               |
| 8A-1  | 4  | ND                                               |
| 8A-2  | 2  | ND                                               |
| 8A-3  | 1  | ND                                               |
| 9A-1  | 3  | ND                                               |
| 9A-2  | 1  | ND                                               |
| 9A-3  | 1  | ND                                               |
| Total | 38 | 14                                               |
| <hr/> |    |                                                  |
| M     |    |                                                  |
| E-1   | 21 | E-1.1, 1.2, 1.3,1.5 to 1.21                      |
| E-2   | 1  | E-2.1                                            |
| J-1   | 1  | E-3.1                                            |
| Total | 23 | 22                                               |
| <hr/> |    |                                                  |
| NS    |    |                                                  |
| 1D-1  | 13 | 1D-1.1, 1.2, 1.4, 1.5, 1.7, 1.8, 1.9, 1.10, 1.12 |

|                |     |               |
|----------------|-----|---------------|
| 1C-1           | 1   | 1C-1.1        |
| 2B-1           | 8   | 2B-1.1 to 1.8 |
| 2B-2           | 1   | 2B-2.1        |
| Total          | 23  | 18            |
| Overall totals | 248 | 142           |

<sup>a</sup> Not detected
