# Supplementary material for: Genetic Structure of Avian Influenza Viruses from Ducks of the Atlantic Flyway of North America
Source: PubMed Central journal article supplement (PMC3907406; doi:10.1371/journal.pone.0086999), 2014-01-30
Supplement: pone.0086999.s014.pdf [file pone.0086999.s014.pdf]

Table S9. Identification of Atlantic Flyway duck AIV gene types in hosts other than ducks.

| Segment | Gene type | Hosts                                         |
|---------|-----------|-----------------------------------------------|
| PB2     | C-2.2     | shorebird                                     |
|         | C-2.3     | shorebird, goose, turkey, chicken             |
|         | C-2.5     | goose                                         |
|         | C-2.7     | shorebird                                     |
|         | C-2.12    | chicken                                       |
|         | C-2.13    | shorebird                                     |
|         | C-2.15    | turkey, quail                                 |
|         | C-2.16    | chicken                                       |
|         | C-2.19    | shorebird                                     |
|         | C-3.1     | shorebird, goose, turkey, swan                |
|         | C-3.5     | shorebird                                     |
|         | C-4.1     | murre                                         |
|         | C-5.1     | chicken, guinea fowl, pheasant                |
|         | J-1.1     | gull                                          |
|         | PB1       | F-1.3                                         |
| F-1.4   |           | shorebird, chicken, gull                      |
| F-2.1   |           | turkey, dove                                  |
| F-3.2   |           | shorebird                                     |
| F-3.3   |           | shorebird                                     |
| F-3.4   |           | shorebird                                     |
| F-3.5   |           | shorebird                                     |
| F-3.6   |           | shorebird                                     |
| F-3.7   |           | shorebird                                     |
| F-3.9   |           | shorebird, turkey                             |
| F-3.10  |           | turkey, chicken, guinea fowl, pheasant, quail |
| F-4.5   |           | goose                                         |
| F-4.7   |           | goose, grebe                                  |
| F-5.1   |           | shorebird, turkey, quail                      |
| F-5.2   |           | shorebird, turkey, quail                      |
| F-6.1   |           | shorebird, swan                               |
| F-6.2   |           | turkey, swan                                  |
| F-8.1   | gull      |                                               |
| PA      | H-1.1     | shorebird, chicken, gull, murre               |
|         | H-1.4     | shorebird, gull                               |
|         | H-1.8     | turkey, chicken, guinea fowl, pheasant, quail |
|         | H-1.9     | goose, swan                                   |
|         | H-1.11    | shorebird                                     |
|         | H-1.12    | goose, swan                                   |
|         | H-1.13    | goose                                         |
|         | H-1.14    | shorebird, goose                              |
|         | H-1.16    | goose                                         |
|         | H-1.17    | shorebird                                     |
|         | E-1.1     | dove                                          |
|         | E-1.4     | goose, chicken, coot                          |

|    |         |                                                |
|----|---------|------------------------------------------------|
|    | E-1.5   | goose, chicken                                 |
|    | E-2.1   | shorebird                                      |
|    | E-2.2   | shorebird, goose                               |
|    | E-3.1   | shorebird, gull, murre                         |
|    | E-3.2   | shorebird, turkey                              |
|    | E-3.4   | shorebird                                      |
|    | E-5.1   | shorebird, turkey, quail                       |
|    | E-5.2   | shorebird, turkey                              |
|    | E-6.1   | gull                                           |
|    | E-6.2   | shorebird, gull                                |
| HA | 1D-1.1  | dove, dunlin                                   |
|    | 2H-1.2  | chicken                                        |
|    | 3C-1.2  | shorebird                                      |
|    | 3D-1.1  | shorebird                                      |
|    | 4A-1.1  | shorebird                                      |
|    | 4A-1.4  | shorebird                                      |
|    | 4A-3.2  | shorebird                                      |
|    | 5C-1.2  | goose, turkey, swan                            |
|    | 5C-1.3  | chicken                                        |
|    | 5C-1.4  | goose, turkey, swan                            |
|    | 5C-1.5  | goose, turkey                                  |
|    | 6B-1.1  | shorebird                                      |
|    | 7F-2.1  | turkey, chicken, guinea fowl, quail            |
|    | 13A-1.1 | gull                                           |
| NA | 1E- 2.1 | shorebird, goose                               |
|    | 1E- 2.2 | shorebird, goose                               |
|    | 2D-1.1  | dove                                           |
|    | 2D-1.3  | goose, chicken                                 |
|    | 2D-2.1  | shorebird                                      |
|    | 2D-3.1  | shorebird, goose, turkey                       |
|    | 2G-1.1  | turkey, chicken, guinea fowl, pheasant, chukar |
|    | 2G-1.2  | shorebird, goose, turkey                       |
|    | 3A-2.1  | shorebird                                      |
|    | 3A-2.2  | chicken                                        |
|    | 4A-1.1  | shorebird                                      |
|    | 6A-1.1  | swine                                          |
|    | 6A-1.2  | gull                                           |
|    | 6A-3.2  | shorebird                                      |
| NP | F-1.1   | swine                                          |
|    | H-1.2   | shorebird, goose, turkey, chicken, chukar      |
|    | H-1.4   | shorebird, goose, chicken                      |
|    | H-1.5   | shorebird, goose                               |
|    | H-1.6   | goose, chicken, swan                           |
|    | H-1.7   | shorebird, goose, turkey, chicken              |
|    | H-2.3   | shorebird                                      |
|    | H-2.4   | goose, dove                                    |

|       |         |                                                |
|-------|---------|------------------------------------------------|
|       | H-2.5   | shorebird, goose, swan                         |
|       | H-3.1   | shorebird                                      |
|       | H-3.4   | shorebird                                      |
|       | H-4.3   | turkey, quail                                  |
|       | H-4.4   | chicken                                        |
|       | H-4.5   | chicken                                        |
|       | H-4.6   | chicken                                        |
|       | H-5.2   | shorebird                                      |
|       | H-6.2   | shorebird, grebe                               |
|       | H-7.1   | chicken, guinea fowl, pheasant                 |
|       | D-1.1   | shorebird, gull                                |
| <hr/> |         |                                                |
| M     | E-1.1   | dove                                           |
|       | E-1.2   | cormorant                                      |
|       | E-1.3   | shorebird, turkey, chicken                     |
|       | E-1.5   | goose, chicken                                 |
|       | E-1.6   | shorebird, turkey, gull, grebe, cormorant      |
|       | E-1.7   | shorebird, turkey, cormorant                   |
|       | E-1.8   | shorebird, goose, murre, swine                 |
|       | E-1.9   | shorebird, turkey, chicken, gull, quail, swine |
|       | E-1.10  | shorebird, turkey, murre                       |
|       | E-1.11  | shorebird, chicken, pheasant                   |
|       | E-1.13  | shorebird, goose, turkey, grebe, cormorant     |
|       | E-1.12  | shorebird, chicken, murre, swine               |
|       | E-1.14  | shorebird, swine                               |
|       | E-1.15  | shorebird                                      |
|       | E-1.16  | turkey, swan, dunlin                           |
|       | E-1.17  | shorebird, turkey, quail, murre, swine         |
|       | E-1.18  | shorebird, goose                               |
|       | E-1.19  | shorebird, turkey, chicken, guinea fowl, rhea  |
|       | E-1.20  | goose                                          |
|       | E-1.21  | turkey, chicken                                |
|       | E-2.1   | turkey, chicken, guinea fowl, pheasant, quail  |
|       | J-1.1   | shorebird, gull                                |
| <hr/> |         |                                                |
| NS    | 1D-1.1  | shorebird, turkey, chicken, coot               |
|       | 1D-1.2  | goose, coot                                    |
|       | 1D-1.4  | shorebird, chicken                             |
|       | 1D-1.5  | goose, chicken                                 |
|       | 1D-1.7  | shorebird, goose, turkey, swan, swine          |
|       | 1D-1.8  | shorebird, goose, turkey, guinea fowl, swine   |
|       | 1D-1.9  | shorebird, goose, turkey, chicken              |
|       | 1D-1.10 | shorebird                                      |
|       | 1D-1.12 | shorebird                                      |
|       | 1C-1.1  | gull                                           |
|       | 2B-1.1  | gull                                           |
|       | 2B-1.2  | shorebird, goose, murre                        |
|       | 2B-1.3  | shorebird, gull                                |

|        |                                               |
|--------|-----------------------------------------------|
| 2B-1.4 | gull                                          |
| 2B-1.5 | gull                                          |
| 2B-1.6 | goose, guinea fowl, murre                     |
| 2B-1.7 | shorebird                                     |
| 2B-1.8 | shorebird, swan                               |
| 2B-2.1 | turkey, chicken, guinea fowl, pheasant, quail |

---
